# Supplementary material for: Highly conserved elements discovered in vertebrates are present in non-syntenic loci of tunicates, act as enhancers and can be transcribed during development
Source: PubMed Central journal article supplement — Nucleic Acids Res. 2013 Feb 6;41(6):3600–18. doi: 10.1093/nar/gkt030 (PMC3616699; doi:10.1093/nar/gkt030), 2013-02-06

**Supplementary Table 1.** Used core databases and genome builds. The table indicates, for each genome used in the analyses, the name of the respective ensembl core database and the relative genome build.

| <b>Species</b>                | <b>Ensembl core database</b>      | <b>Genome build</b> |
|-------------------------------|-----------------------------------|---------------------|
| <i>Homo sapiens</i>           | homo_sapiens_core_49_36k          | NCBI36              |
| <i>Mus musculus</i>           | mus_musculus_core_49_37b          | NCBIM37             |
| <i>Canis familiaris</i>       | canis_familiaris_core_49_2g       | BROADD2             |
| <i>Takifugu rubripes</i>      | takifugu_rubripes_core_49_4i      | FUGU4               |
| <i>Danio rerio</i>            | danio_rerio_core_49_7c            | ZFISH7              |
| <i>Gasterosteus aculeatus</i> | gasterosteus_aculeatus_core_49_1f | BROADS1             |
| <i>Oryzias latipes</i>        | oryzias_latipes_core_49_1e        | MEDAKA1             |
| <i>Ciona intestinalis</i>     | ciona_intestinalis_core_49_2i     | JGI2                |
| <i>Ciona savignyi</i>         | ciona_savignyi_core_49_2f         | CSAV2.0             |

**Supplementary Table 2.** Amplifications of the fragments containing E1, E2, E3.

Primers used for Ciona enhancer validations

E1\_f: CCGCCAATTTTCCGG  
E1\_r: CACATTACCAGCATAA  
E2\_f: CCGTGTCTTCGTTAC  
E2\_r: CCAAACGCAAAGTCC  
E3\_f: AATGCGTTGGTTACCC  
E3\_r: CGTCATCTTGTTACGT

Length of amplified fragments

E1: 600 bp  
E2: 940 bp  
E3: 300 bp

Primers used for zebrafish enhancer validations

E1\_f: TTGTTAAGCGCAGTTGACAGAAG  
E1\_r: TACTTGAGTTTCCCCCTTGTG  
E2\_f: TTAGAGATAGCCACAGGGGTTGAG  
E2\_r: GTTGGGGATTACACACATAAGC  
E3\_f: AGTTTCACTCCCACCGTCAATC  
E3\_r: GCCGTGGTACTGAAAGTTTCTGAG

Length of amplified elements

E1: 490 bp  
E2: 480 bp  
E3: 1110

**Supplementary Table 3.** Primers used in RT-PCR experiments.

*Primers used for Ciona RT-PCRs*

E1\_f: GAATGGCCCAGCTTATCTCA  
E1\_r: GAGACTTCGGGCTCATTCTG  
E2\_f: GCCGCGCAGAAATTTAATAC  
E2\_r: CAGCATAGGCCCTGATTCAT  
E3\_f: GTGCCTTGGGCATAATTGTT  
E3\_r: TGCACTTAATCAAGTTTTGCAT  
Ci-pans\_f: ATGAATGAAGGCACCTACGC  
Ci-pans\_r: TACGAGCGGAAGCAACTCTT  
Ci-atbf\_f: TCATCATTGCCACGCAGTAT  
Ci-atbf\_r: CATTGATTGTCGATGCTTG

*Primers used for mouse RT-PCRs*

E1\_f: CAGAGGACAGCGGTGTCAATA  
E1\_r: TGCTGCCTGAAATGAAATTACC  
E2\_f: GCTGGTGCCACTACTGAAAGA  
E2\_r: ATAGACCATCGCGCAGGATA  
E3\_f: GATGCATCTTGAGTGGGTCA  
E3\_r: TGGCGGAAAGCCTTTATGAT  
Mm-pans\_f: GCAAGCAGCCTTTTCTCTTC  
Mm-pans\_r: CTGAGGTGATGCAGCATTCTA  
Mm-Otx2\_f: GGACTGCAGGGCAGAGAC  
Mm-Otx2\_r: GAGTGACGGAAGTAGGAGCAA  
Mm-bActin\_f: AGATGACCCAGATCATGTTTGA  
Mm-bActin\_r: TGTGGTACGACCAGAGGCATA

*Primers used for zebrafish RT-PCRs*

E1\_f: GAGCGCGAATGAAATTACCA  
E1\_r: GGCGTGTCAATATCCCCTC  
E2\_f: CACAGCCTGGATGCCTTAAT  
E2\_r: GGCATAGAGCGCAATACACA  
E3\_f: CAGTTTCCGATGCATTTTGA  
E3\_r: TATGGCCCCCTGCACTATTA  
Dr-bActin\_f: TCACAATACCAGTAGTACGACCAGA  
Dr-bActin\_r: TACAATGAGCTCCGTGTTGC

**Supplementary Table 4.** Protocols used in RT-PCR experiments in each analyzed species.

| Organism              | Mouse                                                       |
|-----------------------|-------------------------------------------------------------|
| RNA                   | Total                                                       |
| Tissue                | Whole embryo                                                |
| RNA amount            | 1µg                                                         |
| cDNA preparation kit  | Quantitect Reverse Transcription (Qiagen)                   |
| Negative control      | no retrotranscriptase                                       |
| cDNA amount in PCR    | 50 ng                                                       |
| Primers amount in PCR | 400 nM                                                      |
| Taq                   | Amplitaq Gold (Invitrogen) - 1.5 units                      |
| Final volume PCR      | 20µl                                                        |
| PCR conditions        | 95° 5' - (95° 30" - 58° 30" - 72° 30") x 38 cycles - 72° 7' |

| Organism              | Zebrafish                                                                 |
|-----------------------|---------------------------------------------------------------------------|
| RNA                   | Total                                                                     |
| Tissue                | whole embryo                                                              |
| RNA amount            | 1 µg                                                                      |
| cDNA preparation kit  | RevertAid H minus M-MuLV RT (Fermentas) and random hexamer primer (Roche) |
| Negative control      | DNAseI digested RNA used also as template for cDNA synthesis              |
| cDNA amount in PCR    | 2 µg                                                                      |
| Primers amount in PCR | 10 pmol of each primer (left + right primer)                              |
| Taq                   | GoTaq (Promega) – 0.3µl                                                   |
| Final volume PCR      | 20 µl                                                                     |
| PCR conditions        | 95° 2' - (95° 20" - 60° 20" - 72° 30") x 38 cycles                        |

| Organism              | Ciona                                                                                   |
|-----------------------|-----------------------------------------------------------------------------------------|
| RNA                   | Total                                                                                   |
| Tissue                | Whole embryo                                                                            |
| RNA amount            | 1µg                                                                                     |
| cDNA preparation kit  | QuantiTect Reverse Transcription kit (Qiagen)                                           |
| Negative control      | water; non transcribed RNA; primers combined in ways that should not give amplification |
| cDNA amount in PCR    | 10-20 ng                                                                                |
| Primers amount in PCR | 1 µM                                                                                    |
| Taq                   | Quantifast PCR kit (Qiagen)                                                             |
| Final volume PCR      | 25 µl                                                                                   |
| PCR conditions        | 95° 5' - (95° 10" - 60° 30") x 40 cycles – using Biorad IQ5 real time PCR apparatus     |

**Supplementary Table 5.** oCNE data and sequences. The table contains all the relevant genomic information regarding the discovered elements and their sequences (feature\_pair\_id = oCNE id; csname = coordinate system name; srname = sequence region name).

**(see PDF file named supplementary\_table\_5.pdf)**

**Supplementary Table 6.** Genes flanking or overlapping oCNE in the species analyzed. The annotation in mouse derives from Ensembl, in *Ciona* from Aniseed and in *Oikopleura* and amphioxus from Blast2GO.

**(see PDF file named supplementary\_table\_6.pdf)**

**Supplementary Table 7.** Type and loci of oCNEs duplications.

Vertebrate specific duplications

1. oCNE 1349788 is present in 4 copies upstream to Irx1, Irx3, Irx4, Irx6.
2. oCNE 1351400 is present in 2 copies upstream to the Sox21, Sox14.
3. oCNE 1352111 is present in 2 copies upstream to the Lmo1, Lmo3.

Mammals specific duplications

1. oCNE 1352298 is present in 2 copies downstream to the Neurod2, Neurod6.
2. oCNE 1351047 is present in 2 copies intergenic between Tshz3/Zfp536 and Tshz1/Zfp516.

Fish specific duplications

1. oCNE 1350761 is present in 3 copies intronic to ebf1a, ebf1b, ebf3.
2. oCNE 1351012 is present in 2 copies downstream to lhx1b, lhx1a.

Zebrafish specific duplications

1. oCNE 1349653 is present in 2 copies intronic to pbx3b gene and upstream to pbx3a.
2. oCNE 1350007 is present in 2 copies intronic to dachd, dachc.
3. oCNE 1350084 is present in 3 copies intronic to dacha, dachd, dachc.
4. oCNE 1353058 is present in 2 copies downstream to pax7a, pax7b.

Ascidian specific duplications

1. oCNE 1352154 is present in 4 copies in a 3kb region on the chromosome 2q, intergenic between rpl31/pigf. The same element is present in 5 copies in the syntenic region of Ciona savignyi.
2. oCNE 1351484 is present in 2 copies in a 7kb region on the chromosome 7q, intronic and upstream to two genes of unknown function. The same element is present in 1 copy in the syntenic region of Ciona savignyi.
3. oCNE 1351973 is present in 4 copies in a 22kb region on the chromosome 1q, intronic to the ccnb3 gene and intergenic between ccn3/bai1. The same element is present in 1 copy in the syntenic region of Ciona savignyi.

**Supplementary Table 8.** Jaspar analysis results. For each family of transcription factors is reported the number of the oCNEs and rCNEs (considered as a negative set) containing at least 1 match with the corresponding transcription factor, the p-value and the corrected p-value for the comparisons of the 2 proportions testing the enrichments in oCNEs.

| <b>MOUSE</b>                  |              |              |          |              |
|-------------------------------|--------------|--------------|----------|--------------|
| <b>class</b>                  | <b>oCNEs</b> | <b>rCNEs</b> | <b>p</b> | <b>p.adj</b> |
| Homeobox class                | 140          | 91           | 1.67E-10 | 1.83E-09     |
| bZIP cEBP-like subclass       | 85           | 58           | 1.85E-04 | 1.02E-03     |
| HMG class                     | 150          | 142          | 3.44E-03 | 1.26E-02     |
| Forkhead class                | 96           | 83           | 1.33E-02 | 3.66E-02     |
| TRP(MYB) class                | 137          | 136          | 4.90E-02 | 1.08E-01     |
| MADS class                    | 31           | 33           | 4.74E-01 | 8.69E-01     |
| Nuclear Receptor class        | 70           | 118          | 1.00E+00 | 1.00E+00     |
| bZIP CREB/G-box-like subclass | 37           | 46           | 6.68E-01 | 1.00E+00     |
| ETS class                     | 17           | 38           | 9.93E-01 | 1.00E+00     |
| REL class                     | 8            | 15           | 8.47E-01 | 1.00E+00     |
| bHLH(zip) class               | 21           | 44           | 9.94E-01 | 1.00E+00     |

| <b>FUGU</b>                   |              |              |          |              |
|-------------------------------|--------------|--------------|----------|--------------|
| <b>class</b>                  | <b>oCNEs</b> | <b>rCNEs</b> | <b>p</b> | <b>adj.p</b> |
| Homeobox class                | 138          | 81           | 1.56E-12 | 1.71E-11     |
| bZIP cEBP-like subclass       | 92           | 47           | 2.26E-08 | 1.24E-07     |
| Forkhead class                | 96           | 54           | 1.41E-07 | 5.18E-07     |
| HMG class                     | 144          | 128          | 4.58E-04 | 1.26E-03     |
| TRP(MYB) class                | 126          | 122          | 4.04E-02 | 8.88E-02     |
| REL class                     | 11           | 9            | 3.16E-01 | 5.79E-01     |
| bZIP CREB/G-box-like subclass | 35           | 43           | 6.37E-01 | 8.76E-01     |
| MADS class                    | 32           | 39           | 6.11E-01 | 8.76E-01     |
| ETS class                     | 15           | 34           | 9.91E-01 | 9.99E-01     |
| Nuclear Receptor class        | 73           | 114          | 9.99E-01 | 9.99E-01     |
| bHLH(zip) class               | 24           | 44           | 9.80E-01 | 9.99E-01     |

| <b>CIONA</b>                  |              |              |          |              |
|-------------------------------|--------------|--------------|----------|--------------|
| <b>class</b>                  | <b>oCNEs</b> | <b>rCNEs</b> | <b>p</b> | <b>p.adj</b> |
| Homeobox class                | 131          | 65           | 9.16E-15 | 1.01E-13     |
| HMG class                     | 153          | 129          | 7.78E-06 | 4.28E-05     |
| Forkhead class                | 96           | 71           | 3.91E-04 | 1.43E-03     |
| bZIP cEBP-like subclass       | 84           | 64           | 2.59E-03 | 7.13E-03     |
| TRP(MYB) class                | 146          | 146          | 4.67E-02 | 1.03E-01     |
| MADS class                    | 45           | 37           | 8.05E-02 | 1.48E-01     |
| ETS class                     | 26           | 25           | 3.45E-01 | 5.43E-01     |
| REL class                     | 6            | 7            | 5.00E-01 | 6.88E-01     |
| bZIP CREB/G-box-like subclass | 55           | 67           | 6.96E-01 | 8.51E-01     |
| bHLH(zip) class               | 31           | 43           | 8.23E-01 | 9.06E-01     |
| Nuclear Receptor class        | 64           | 86           | 9.17E-01 | 9.17E-01     |



**Supplementary Table 9.** The table shows for amphioxus and Oikopleura the number and the score of oCNEs associated genes classified for the top scoring GO biological processes by Blast2GO analysis.

| <b>Amphioxus</b> |                                      |             |              |
|------------------|--------------------------------------|-------------|--------------|
| <b>Level</b>     | <b>GO Term</b>                       | <b>#Seq</b> | <b>Score</b> |
| 3                | regulation of biological process     | 20          | 16.11        |
| 4                | regulation of cellular process       | 17          | 15.05        |
| 3                | anatomical structure development     | 15          | 11.38        |
| 3                | multicellular organismal development | 15          | 10.03        |
| 4                | transport                            | 11          | 9.67         |
| 5                | organ development                    | 12          | 8.28         |
| 3                | macromolecule metabolic process      | 14          | 8.25         |
| 4                | signal transduction                  | 9           | 7.42         |
| 4                | anatomical structure morphogenesis   | 8           | 6.84         |
| 3                | cellular metabolic process           | 15          | 6.84         |

| <b>Oikopleura</b> |                                      |             |              |
|-------------------|--------------------------------------|-------------|--------------|
| <b>Level</b>      | <b>GO Term</b>                       | <b>#Seq</b> | <b>Score</b> |
| 3                 | anatomical structure development     | 5           | 9.32         |
| 4                 | regulation of cellular process       | 6           | 7.12         |
| 5                 | organ development                    | 4           | 6.87         |
| 3                 | multicellular organismal development | 5           | 6.4          |
| 3                 | regulation of biological process     | 6           | 5.32         |
| 4                 | anatomical structure morphogenesis   | 3           | 5.15         |
| 4                 | system development                   | 4           | 5.1          |

**Supplementary Figure 1.** Validation of zebrafish oCNEs enhancer function in zebrafish. The figure reports, for each validation, a schema representing the injected construct, a representative image of the screened embryos and a chart indicating the percentage of embryo expressing the reporter in the relative tissue. A is the construct containing the negative control, B-D are relative to the tested oCNEs.

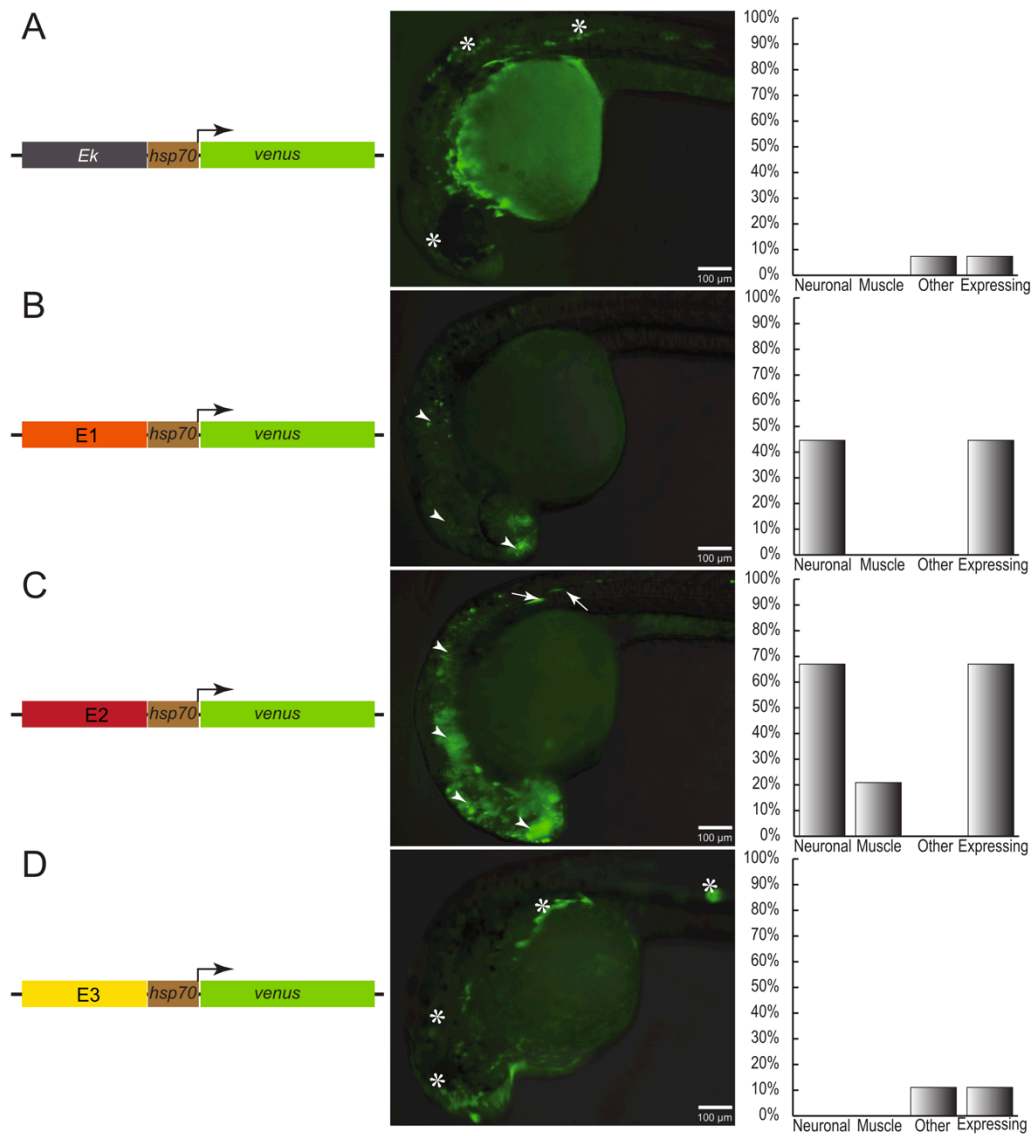

**Supplementary Figure 2.** Validation of ciona oCNEs enhancer function in zebrafish. The figure reports, for each transgenesis validation, a schema representing the injected construct, a representative image of the screened embryos and a chart indicating the percentage of embryo expressing the reporter in the relative tissue. A is the construct containing the negative control, B-D are relative to the tested oCNEs.

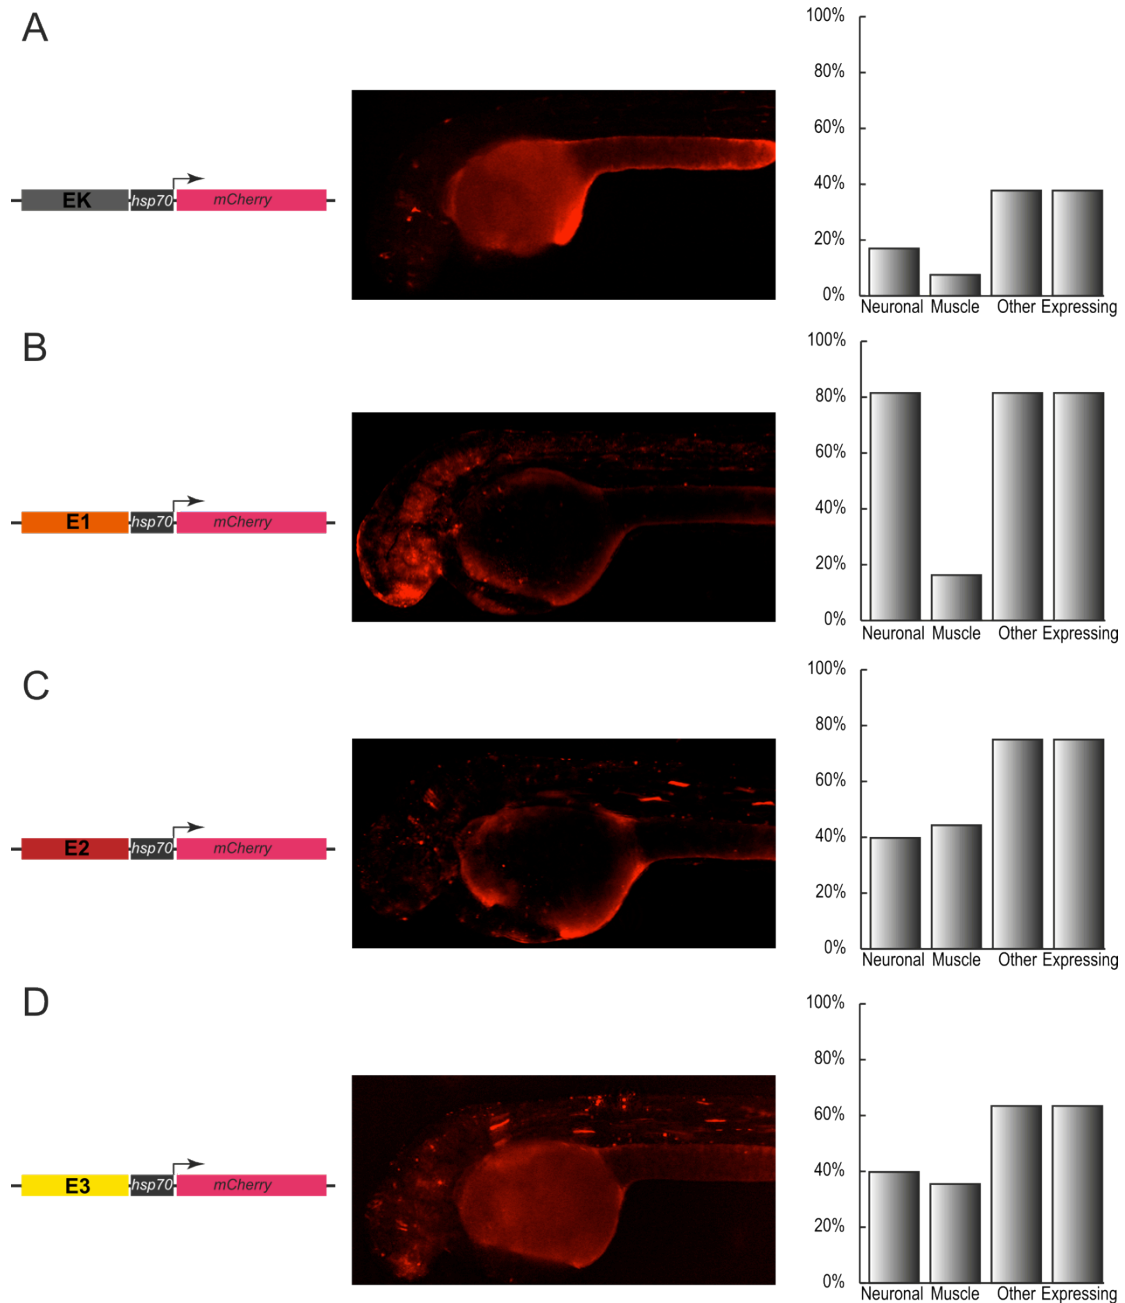

**Supplementary Figure 3.** Chart indicating the percentages of Ciona embryos and the tissues expressing the reporter in transgenesis experiments. For each element more than 100 embryos were tested.

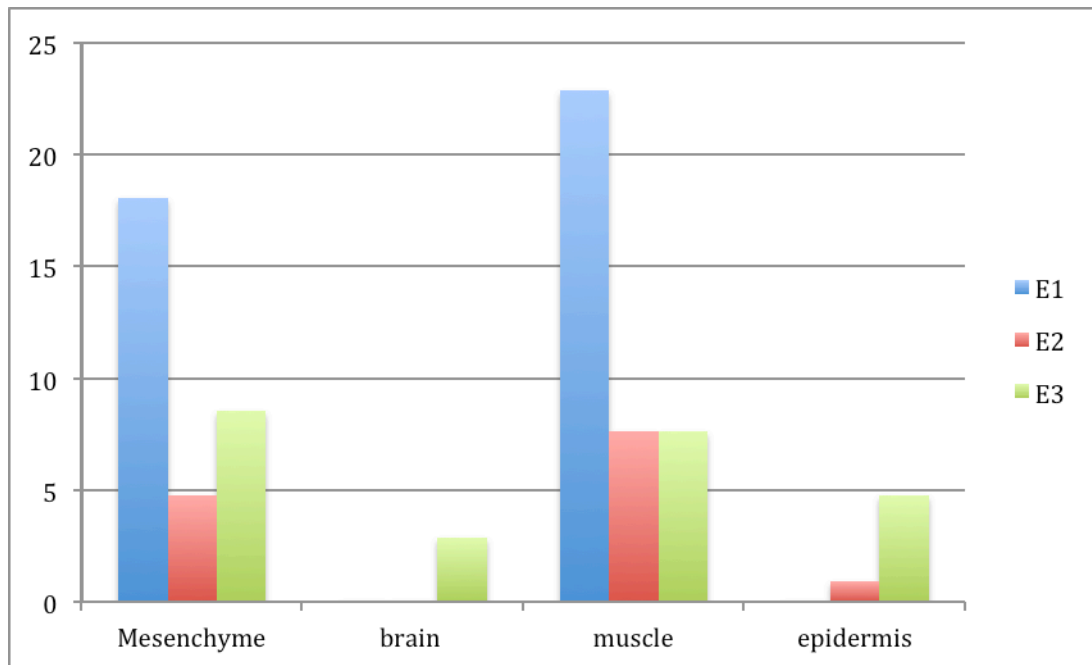

**Supplementary Figure 4.** Boxplot showing the distributions of the number of the 183 oCNEs and 183 randomly selected genomic regions overlapping contigs from the ENCODE/CSHL Long and Short RNA-seq tracks in the UCSC hg19 human genome browser.

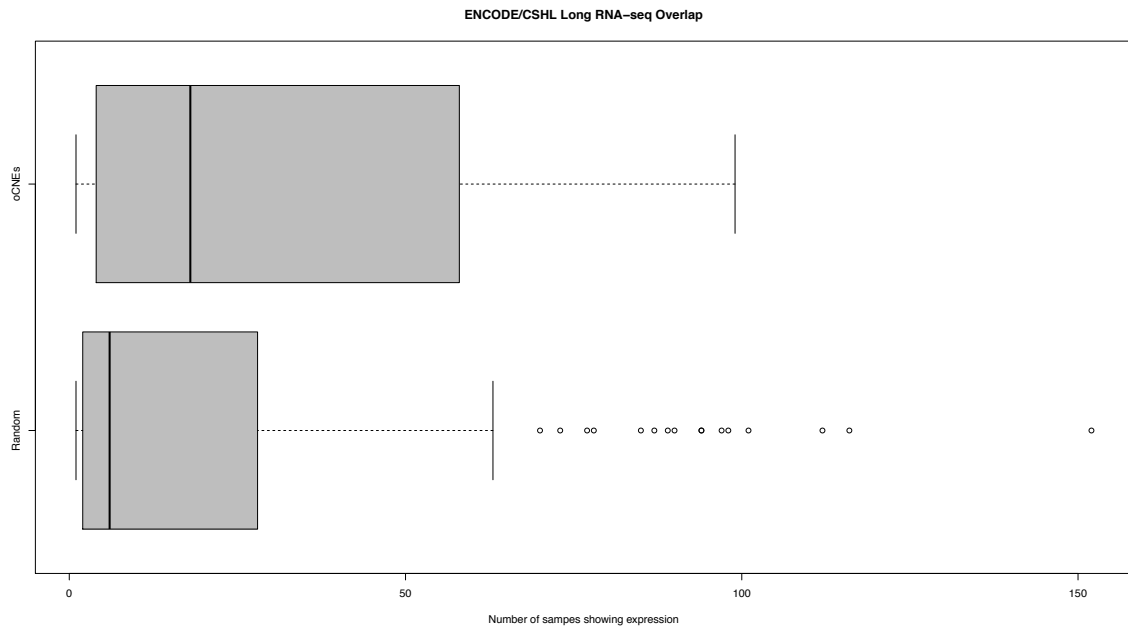

**Supplementary Figure 5.** Window lengths and common domain enrichments. The chart shows, for 3 different genomic intervals, the difference between the percentage of oCNEs (light grey) and randomly coupled vCNEs/rCNEs (dark grey) containing at least one common protein domain in all the species analyzed. Adjusted p-values are reported on the side of each couple of bars. Window lengths are in Kb.

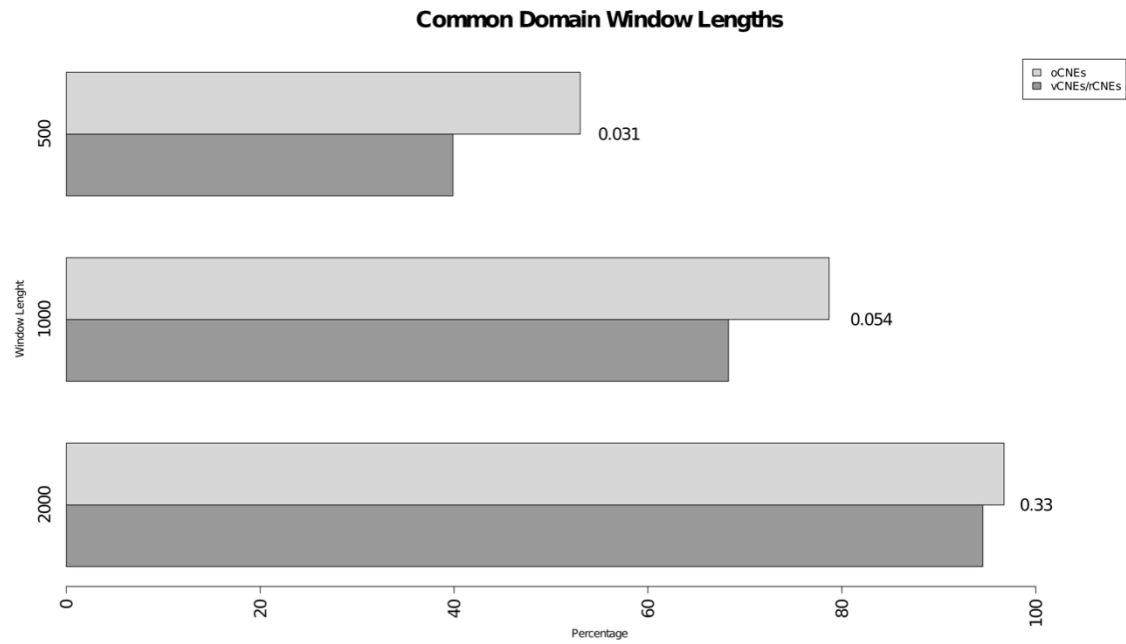

Supplement: supp_gkt030_nar-02655-h-2012-File007.pdf [file supp_gkt030_nar-02655-h-2012-File007.pdf]
