# Supplementary material for: Highly conserved elements discovered in vertebrates are present in non-syntenic loci of tunicates, act as enhancers and can be transcribed during development
Source: PubMed Central journal article supplement — Nucleic Acids Res. 2013 Feb 6;41(6):3600–18. doi: 10.1093/nar/gkt030 (PMC3616699; doi:10.1093/nar/gkt030), 2013-02-06
Supplement: supp_gkt030_nar-02655-h-2012-File008.pdf [file supp_gkt030_nar-02655-h-2012-File008.pdf]

| ocNE_id | csn         | srn          | start     | end       | strand | seq                                                     | organism               |
|---------|-------------|--------------|-----------|-----------|--------|---------------------------------------------------------|------------------------|
| 1354045 | reflig      | reflig_11    | 1364789   | 1364828   | -1     | AAACACATTACCGTAAAAACAAACAGCTCCGATGACAAAA                | Ciona savignyi         |
| 1354045 | chromosome  | 36           | 20514674  | 20514711  | 1      | GAACACAGCGGGGAGAGGAAATAGAAAGCTGAGAAAA                   | Canis familiaris       |
| 1354045 | chromosome  | 2            | 173823341 | 173823378 | 1      | GAACACAGCAGGGGAGAGGAAATAGGAGGCTGAGAAAA                  | Homo sapiens           |
| 1354045 | scaffold    | scaffold_100 | 599095    | 599132    | -1     | AAACACAGCGGGGAGAGGAAACAGGAGGCTGAGAAAA                   | Takifugu rubripes      |
| 1354045 | chromosome  | 3q           | 989911    | 989950    | 1      | AAACACATTACGAAAAAGCAACAGGAGCTGACAAAA                    | Ciona intestinalis     |
| 1354045 | group       | groupXVI     | 10088996  | 10089033  | -1     | AAACACAGCAGGGGAGAGGAAACAGGAGGCTGAGAAAA                  | Gasterosteus aculeatus |
| 1354045 | chromosome  | 21           | 24218352  | 24218389  | 1      | AAACACAGCGGGGAGAGGAAACAGGAGGCTGAGAAAA                   | Oryzias latipes        |
| 1354045 | toplevel    | 9            | 3495253   | 3495290   | 1      | AAGCTCAGCGGGGAGAGGAAACAGGAGCTGAGAAAA                    | Danio rerio            |
| 1354045 | chromosome  | 2            | 72264914  | 72264951  | 1      | GAACACAGCAGGGGAGAGGAAATAGGAGGCTGAGAAAA                  | Mus musculus           |
| 1352888 | reflig      | reflig_1     | 1879540   | 1879580   | 1      | TATATATTGCATAACATAAATGATAAATCGTCACTCACTC                | Ciona savignyi         |
| 1352888 | chromosome  | 36           | 18274289  | 18274327  | 1      | TATACATTCCACATAGTACTTACTTAATTTGTCC                      | Canis familiaris       |
| 1352888 | chromosome  | 2            | 171279822 | 171279860 | 1      | TATACATTCCACATAGTACTTACTTCAATTAATTTGCC                  | Homo sapiens           |
| 1352888 | scaffold    | scaffold_100 | 795643    | 795681    | -1     | TATACATTCCACATAGTACTTACTTCAATTAATTTGCC                  | Takifugu rubripes      |
| 1352888 | chromosome  | 1q           | 2284631   | 2284670   | 1      | TATATATTCCATTACGTTGTGATAAATCGTCAATCGTCC                 | Ciona intestinalis     |
| 1352888 | group       | groupXVI     | 10318893  | 10318931  | -1     | TATACATTCCACATAGTACTTACTTCAATTAATTTGCC                  | Gasterosteus aculeatus |
| 1352888 | chromosome  | 21           | 23927463  | 23927501  | 1      | TATACATTCCACATAGTACTTACTTCAATTAATTTGCC                  | Oryzias latipes        |
| 1352888 | toplevel    | 9            | 2582002   | 2582040   | 1      | TATACATTCCACATAGTACTTACTTCAATTAATTTGCC                  | Danio rerio            |
| 1352888 | chromosome  | 2            | 70312907  | 70312945  | 1      | TATACATTCCACATAGTACTTACTTCAATTAATTTGCC                  | Mus musculus           |
| 1353858 | reflig      | reflig_98    | 186679    | 186724    | 1      | TTAAGCGTTAAAAAATCAATTCGAGAATAAATGAATTTGCGCG             | Ciona savignyi         |
| 1353858 | chromosome  | 26           | 11787209  | 11787251  | -1     | TGATCCATTTCAAAATCTAATCAACAGAAATAGGATCTTTTCAT            | Canis familiaris       |
| 1353858 | chromosome  | 12           | 109999767 | 109999809 | -1     | TGATCCATTTCAAAATCTAATCAACAGAAATAGGATCTTTTCAT            | Homo sapiens           |
| 1353858 | scaffold    | scaffold_7   | 2309648   | 2309692   | -1     | TGATCCGTTTTGAAAAATCTAATCAACTGAATAGGATCTTGTCAT           | Takifugu rubripes      |
| 1353858 | chromosome  | 1q           | 6441339   | 6441384   | 1      | TTAACCGTTAAAAAATCAATTCAGAAATAAATGAATTTCTTCTT            | Ciona intestinalis     |
| 1353858 | group       | groupXIII    | 16458664  | 16458608  | -1     | TGATCCATTTGAAAAATCTAATCAACTGAATAGGATCTTTTCAT            | Gasterosteus aculeatus |
| 1353858 | chromosome  | 9            | 25634234  | 25634278  | -1     | TGATCCATTTGAAAAATCTAATCAACTGAATAGGATCTTTTCAT            | Oryzias latipes        |
| 1353858 | toplevel    | 8            | 9203134   | 9203178   | 1      | TGATCCCTTTGAAAAATCTAATCAACAGAGCAGGATCTTTTCAT            | Danio rerio            |
| 1353858 | chromosome  | 5            | 122467136 | 122467178 | 1      | TGATCCATTTGAAAAATCTAATCAACAGAAATAGGATCTTTTCAT           | Mus musculus           |
| 1353064 | reflig      | reflig_1     | 2399153   | 2399201   | 1      | TGAATGAAGGACTGCTGCTGACGCTTGAATTTAATTTCCCGT              | Ciona savignyi         |
| 1353064 | chromosome  | 4            | 29078475  | 29078518  | 1      | TGAGCAAAGGCGCCCTGACAGGGATTATTTATTTGTCAT                 | Canis familiaris       |
| 1353064 | chromosome  | 10           | 77137864  | 77137907  | 1      | TGAGCAAAGGCGCCCTGACAGGGATTATTTATTTGTCAT                 | Homo sapiens           |
| 1353064 | scaffold    | scaffold_59  | 1359247   | 1359290   | -1     | TGAGCAAAGGCGCTGCTGACAGGGATTATTTATTTGTCAT                | Takifugu rubripes      |
| 1353064 | chromosome  | 3p           | 1225988   | 1226035   | 1      | TGAATCAGGCGCTACTGCTGCAACTTTTGAATTTAATTTCCCGT            | Ciona intestinalis     |
| 1353064 | group       | groupV       | 369914    | 369957    | 1      | TGAGCAAAGGACTGCTGACAGGGATTATTTATTTGTCAT                 | Gasterosteus aculeatus |
| 1353064 | chromosome  | 19           | 9307763   | 9307806   | 1      | TGAGCAAAGGCGCTGCTGACAGGGATTATTTATTTGTCAT                | Oryzias latipes        |
| 1353064 | toplevel    | 13           | 15193231  | 15193274  | 1      | TGAGCAAAGGCGCTGCTGACAGGGATTATTTATTTGTCAT                | Danio rerio            |
| 1353064 | chromosome  | 14           | 23074767  | 23074810  | 1      | TGAGCAAAGGCGCCCTGACAGGGATTATTTATTTGTCAT                 | Mus musculus           |
| 1349646 | reflig      | reflig_7     | 1868104   | 1868151   | -1     | GTCCGGAGCTGCCACTATGCGCGTGGAACAACCGGTCGCTTTTTT           | Ciona savignyi         |
| 1349646 | chromosome  | 1            | 4224433   | 4224477   | 1      | GTCAGGAAGCCACAGATGAGGGAACACAGCTGGCTTCATTT               | Canis familiaris       |
| 1349646 | chromosome  | 18           | 75103418  | 75103462  | -1     | GTCAGGAAGCCACAGTATGAGGGAACACAGCTGGCTTCATTT              | Homo sapiens           |
| 1349646 | scaffold    | scaffold_133 | 80382     | 80427     | 1      | GTCAGGAAGCCACAGTATGAGGGAACACAGCTGGCTTCATTT              | Takifugu rubripes      |
| 1349646 | chromosome  | 8q           | 2765559   | 2765605   | 1      | GTCCGGGCTGGCACAATGAAGGGAACACAGCTGGCTTCATTT              | Ciona intestinalis     |
| 1349646 | group       | groupXX      | 4178858   | 4178903   | 1      | GTCAGGAAGCCACAGTATGAGGGAACACAGCTGGATTCATTT              | Gasterosteus aculeatus |
| 1349646 | ultracontig | 182          | 1464731   | 1464776   | 1      | GTCAGGAAGCCACAGTATGAGGGAACACAGCTGGCTTCATTT              | Oryzias latipes        |
| 1349646 | toplevel    | 16           | 2588031   | 2588075   | -1     | GTCAGGAAGCCACAGTGGCAGGGAACACAGCTGGCTTCATTT              | Danio rerio            |
| 1349646 | chromosome  | 18           | 81015555  | 81015599  | 1      | GTCAGGAAGCCACAGTATGAGGGAACACAGCTGGCTTCATTT              | Mus musculus           |
| 1353964 | reflig      | reflig_37    | 811342    | 811385    | 1      | ATAAGTTGAATGAAAAATTTTAAACGTTAGTTGAATCAATGA              | Ciona savignyi         |
| 1353964 | chromosome  | 28           | 41540800  | 41540840  | 1      | AAATTTGAATGCAATAGAATAATCTTGATAATTAATGA                  | Canis familiaris       |
| 1353964 | chromosome  | 10           | 131581705 | 131581745 | 1      | AAATTTGAATGCAATAGAATAATCTTGATAATTAATGA                  | Homo sapiens           |
| 1353964 | scaffold    | scaffold_97  | 430482    | 430522    | -1     | AAATTTGAATGCAATAGAATAATCTTTATAATTAATGA                  | Takifugu rubripes      |
| 1353964 | scaffold    | scaffold_850 | 474       | 516       | 1      | GAAATGGAATGAAATATCAAACGTGGTTTATAATCAATGA                | Ciona intestinalis     |
| 1353964 | group       | groupIV      | 14121821  | 14121861  | 1      | AAATTTGAATGCAATAGAATAATCTTTATAATTAATGA                  | Gasterosteus aculeatus |
| 1353964 | chromosome  | 10           | 16881724  | 16881764  | 1      | AAATTTGAATGCAATAGAATAATCTTTATAATTAATGA                  | Oryzias latipes        |
| 1353964 | toplevel    | 21           | 26146580  | 26146619  | 1      | AAATTTGAATGCAATAGAATAATCTTTATAATTAATGA                  | Danio rerio            |
| 1353964 | chromosome  | 7            | 144442366 | 144442406 | 1      | AAATTTGAATGCAATAGAATAATCTTTATAATTAATGA                  | Mus musculus           |
| 1353533 | reflig      | reflig_15    | 1376257   | 1376302   | -1     | CCATCTTCATATTTGCGCTCAGTTTCTTTAAGTTATTTCCGAT             | Ciona savignyi         |
| 1353533 | chromosome  | 28           | 16329483  | 16329525  | 1      | TATTTTTCAATTTGCTGCCACAGTATTAATTTATTCGATAT               | Canis familiaris       |
| 1353533 | chromosome  | 10           | 102372592 | 102372634 | 1      | TATTTTTCAATTTGCTGCCACAGTATTAATTTATTCGATAT               | Homo sapiens           |
| 1353533 | scaffold    | scaffold_86  | 642642    | 642684    | -1     | TATTTTTCAATTTGCTGCCACAGTATTAATTTATTCGATAT               | Takifugu rubripes      |
| 1353533 | chromosome  | 4q           | 410858    | 410902    | 1      | TGTTCTTTTATTTTCTGCTCAGTTTCTTAAAGTTAATTCGCAT             | Ciona intestinalis     |
| 1353533 | group       | groupVI      | 9653140   | 9653182   | 1      | TATTTTTCAATTTGCTGCCACAGTATTAATTTATTCGATAT               | Gasterosteus aculeatus |
| 1353533 | chromosome  | 15           | 21110238  | 21110280  | -1     | TATTTTTCAATTTGCTGCCACAGTATTAATTTATTCGATAT               | Oryzias latipes        |
| 1353533 | toplevel    | 12           | 47408161  | 47408203  | -1     | TATTTTTCAATTTGCTGCCACAGTATTAATTTATTCGATAT               | Danio rerio            |
| 1353533 | chromosome  | 19           | 44716010  | 44716052  | 1      | TATTTTTCAATTTGCTGCCACAGTATTAATTTATTCGATAT               | Mus musculus           |
| 1351662 | reflig      | reflig_14    | 793616    | 793659    | -1     | TCCGATTAATCACTACTCAAAGAGTCCCGTCATGAATCAAATG             | Ciona savignyi         |
| 1351662 | chromosome  | 9            | 60731061  | 60731100  | 1      | TCTGATTAATTAATCAAATGCTGCTGTATTCAAATG                    | Canis familiaris       |
| 1351662 | chromosome  | 9            | 127573073 | 127573112 | -1     | TCTGATTAATTAATCAAATGCTGCTGTATTCAAATG                    | Homo sapiens           |
| 1351662 | scaffold    | scaffold_18  | 734017    | 734056    | -1     | TCTGATTAATTAATCAAATGCGCGCTGTTAATCAAATG                  | Takifugu rubripes      |
| 1351662 | chromosome  | 1q           | 1814258   | 1814301   | 1      | TCCGATTAATCACTACTCAAACCGTTCGCTGATAATCAAATG              | Ciona intestinalis     |
| 1351662 | group       | groupXIII    | 13548502  | 13548541  | -1     | TCTGATTAATTAATCAAATGCTGCGCTGTTAATCAAATG                 | Gasterosteus aculeatus |
| 1351662 | chromosome  | 9            | 18952180  | 18952219  | -1     | TCTGATTAATTAATCAAATGCTGCGCTGTTAATCAAATG                 | Oryzias latipes        |
| 1351662 | toplevel    | 8            | 32400757  | 32400794  | -1     | CTGATTAATTAATCAAATGCTGCGCTGTTAATCAAATG                  | Danio rerio            |
| 1351662 | chromosome  | 2            | 34202687  | 34202726  | 1      | TCTGATTAATTAATCAAATGCTGCTGTATTCAAATG                    | Mus musculus           |
| 1350007 | reflig      | reflig_15    | 1588562   | 1588605   | -1     | TGATCTTAAAAAATCAATATTCATCGACAGGCGGAGGATTAATA            | Ciona savignyi         |
| 1350007 | chromosome  | 22           | 28924476  | 28924520  | 1      | GGATATTTAATTAATCAAAATCTAATCTCGATTCATTAAGGCTCACAT        | Canis familiaris       |
| 1350007 | chromosome  | 13           | 71199268  | 71199312  | 1      | GGATATTTAATTAATCAAAATCTAATCTCGATTCATTAAGGCTCACAT        | Homo sapiens           |
| 1350007 | scaffold    | scaffold_31  | 409143    | 409187    | -1     | GGATATTTAATTAATCAAAATCTAATCTCGATTCATTAAGGCTCACAT        | Takifugu rubripes      |
| 1350007 | chromosome  | 4q           | 825337    | 825379    | 1      | GGCTTTTAAAAAATCAAAATCTAATCTCGATTCATTAAGGCTCACAT         | Ciona intestinalis     |
| 1350007 | chromosome  | 21           | 9487993   | 9488037   | 1      | GGATATTTAATTAATCAAAATCTAATCTCGATTCATTAAGGCTCACAT        | Oryzias latipes        |
| 1350007 | group       | groupXVI     | 2722520   | 2722564   | -1     | GGATATTTAATTAATCAAAATCTAATCTCGATTCATTAAGGCTCACAT        | Gasterosteus aculeatus |
| 1350007 | toplevel    | 9            | 24892417  | 24892461  | -1     | GGATATTTAATTAATCAAAATCTAATCTCGATTCATTAAGGCTCACAT        | Danio rerio            |
| 1350007 | chromosome  | 14           | 98446263  | 98446307  | 1      | GGATATTTAATTAATCAAAATCTAATCTCGATTCATTAAGGCTCACAT        | Mus musculus           |
| 1350761 | reflig      | reflig_19    | 4767823   | 4767882   | 1      | CAAACTGCTAAATGCAATTAATTTCTAATGAATTAAGCTGAGGTGGGAAAACTT  | Ciona savignyi         |
| 1350761 | chromosome  | 28           | 41540800  | 41540855  | 1      | AAATTTGAATGCAATAGAATAATCTTGATAATTAATGAAAACCTGTCAATTTTT  | Canis familiaris       |
| 1350761 | chromosome  | 10           | 131581705 | 131581760 | 1      | AAATTTGAATGCAATAGAATAATCTTGATAATTAATGAAAACCTGTCAATTTTT  | Homo sapiens           |
| 1350761 | scaffold    | scaffold_97  | 430467    | 430522    | -1     | AAATTTGAATGCAATAGAATAATCTTTATAATTAATGAAAACCTGTCAATTTTT  | Takifugu rubripes      |
| 1350761 | chromosome  | 2q           | 2591879   | 2591937   | -1     | AACITTTGCTGCACCTGAGTTAATCATTAGAATAATGCAATTTGTGGCAAGTTTG | Ciona intestinalis     |
| 1350761 | group       | groupIV      | 14121821  | 14121876  | 1      | AAATTTGAATGCAATAGAATAATCTTTATAATTAATGAAAACCTGTCAATTTTT  | Gasterosteus aculeatus |
| 1350761 | chromosome  | 10           | 16881724  | 16881779  | 1      | AAATTTGAATGCAATAGAATAATCTTTATAATTAATGAAAACCTGTCAATTTTT  | Oryzias latipes        |
| 1350761 | toplevel    | 21           | 26146580  | 26146635  | 1      | AAATTTGAATGCAATAGAATAATCTTTATAATTAATGAAAACCTGTCAATTTTT  | Danio rerio            |

|         |            |                  |           |           |    |                                                                 |                        |
|---------|------------|------------------|-----------|-----------|----|-----------------------------------------------------------------|------------------------|
| 1350761 | chromosome | 7                | 144442366 | 144442421 | 1  | AAATTTGAATTCGAAATAGAAATACTTTGATAAATTAAGAAAACCTGCAATTTTT         | Mus musculus           |
| 1354218 | reflig     | reflig_145       | 233954    | 233992    | 1  | GCAAAATGAACCTGATTGAATGCTGTAACCTACTTTGA                          | Ciona savignyi         |
| 1354218 | chromosome | 18               | 13326100  | 13326136  | 1  | GCAAAATACATCAGACCTACAGCTGAACCCGACATT                            | Canis familiaris       |
| 1354218 | chromosome | 7                | 39360042  | 39360078  | -1 | GCAAAATACATCAGACCTACAGCTGAACCCGACATT                            | Homo sapiens           |
| 1354218 | scaffold   | scaffold_223     | 244985    | 245021    | -1 | GCAAAATCACCAGACCTACAGCTGATCCCGCATT                              | Takifugu rubripes      |
| 1354218 | chromosome | 14q              | 2152335   | 2152374   | -1 | GCAAAATGAACCTGATTGACGGTTGTAACCCAGATATT                          | Ciona intestinalis     |
| 1354218 | group      | groupXXI         | 9778795   | 9778831   | -1 | GCAAAATCACCAGACCTACAGCTGAGCCCGACATT                             | Gasterosteus aculeatus |
| 1354218 | chromosome | 20               | 19212633  | 19212669  | -1 | GCAAAATCACCAGACCTACAGCTGAGCCCGCATT                              | Oryzias latipes        |
| 1354218 | toplevel   | 24               | 9476635   | 9476671   | 1  | GCAAAATCAGCAGACCTACAGCTGAGGCTGACATT                             | Danio rerio            |
| 1354218 | chromosome | 13               | 18310763  | 18310799  | 1  | GCAAAATCACCAGACCTACAGCTGAACCCGACATT                             | Mus musculus           |
| 1353060 | reflig     | reflig_1         | 2399373   | 2399433   | -1 | GCTTGCTAATAGTCGGCGGACACATCAGACGTAAGGGTGTAAATAACAG               | Ciona savignyi         |
| 1353060 | chromosome | 15               | 48058799  | 48058859  | -1 | GCTTGACAAATGGTGCTTAGAAGCACCATTAAAGATGCTGTAATGGAGCGCATAATGACGG   | Canis familiaris       |
| 1353060 | chromosome | 4                | 147793852 | 147793912 | -1 | ACTTGACAAATGGTGCTTAGAAGCACCATTAAAGACGCTGTAATGGAGCGCATAATGACGG   | Homo sapiens           |
| 1353060 | scaffold   | scaffold_17      | 1505614   | 1505674   | -1 | GCTTGACAAATGGTGCTTAGAAGCACCATTAAAGACGCGACTAATGGCGGCATAATGACGG   | Takifugu rubripes      |
| 1353060 | chromosome | 3p               | 1226207   | 1226265   | -1 | GCGCGCTAATAGCCCTGAGAGACACATTAGACGAACTAAGGGGCTAATAATAACAG        | Ciona intestinalis     |
| 1353060 | group      | groupIX          | 6738411   | 6738471   | 1  | GCTTGACAAATGGTGCTTAGAAGCACCATTAAAGACGCGACTAATGGAGCGCATAATGACGG  | Gasterosteus aculeatus |
| 1353060 | chromosome | 1                | 22407811  | 22407871  | -1 | GCTTGACAAATGGTGCTTAGAAGCACCATTAAAGACGCGGCTAATGGCGGCATAATGACGG   | Oryzias latipes        |
| 1353060 | toplevel   | 1                | 35364548  | 35364608  | -1 | GCTTGACAAATGGTGCTTAGAAGCACCATTAAAGACGCGGCTAATGGGGCGCATAATGACGG  | Danio rerio            |
| 1353060 | chromosome | 8                | 80945911  | 80945971  | 1  | GCTTGACAAATGGTGCTTAGAAGCACCATTAAAGACGCGCTGTAATGGAGCGCATAATGACGG | Mus musculus           |
| 1351391 | reflig     | reflig_0         | 1560761   | 1560800   | 1  | AACGAAATCTCTGCCAATCCCACCTAAAACACTTTGTC                          | Ciona savignyi         |
| 1351391 | chromosome | 21               | 42339036  | 42339075  | 1  | GGCTAAATTAATTAACAATCTCACTGTTGCACCTTTCTC                         | Canis familiaris       |
| 1351391 | chromosome | 11               | 16382404  | 16382443  | 1  | GGCTAAATTAATTAACAATCTCACTGTTGCACCTTTCTC                         | Homo sapiens           |
| 1351391 | scaffold   | scaffold_1       | 7079465   | 7079504   | -1 | GACTAAATTAATTAACAATCTCAATGTTACACACTTTCTC                        | Takifugu rubripes      |
| 1351391 | chromosome | 10q              | 2053503   | 2053542   | -1 | AACGAAATCTCTGCCAATCCCACCTAAAACACTTTGTC                          | Ciona intestinalis     |
| 1351391 | group      | groupII          | 9536214   | 9536253   | -1 | GACTAAATTAATTAACAATCTCAATGTTACACACTTTCTC                        | Gasterosteus aculeatus |
| 1351391 | chromosome | 3                | 17581762  | 17581801  | -1 | GACTAAATTAATTAACAATCTCAATGTTGCACACTTTCTC                        | Oryzias latipes        |
| 1351391 | toplevel   | 7                | 18360761  | 18360800  | -1 | GAGTAAATTAATTAACAATCTAGCTGTTACACACTTTCTC                        | Danio rerio            |
| 1351391 | chromosome | 7                | 123010778 | 123010817 | 1  | GGCTAAATTAATTAACAATCTCGCTGTCACACTTTCTC                          | Mus musculus           |
| 1351111 | reflig     | reflig_58        | 897292    | 897336    | 1  | TTAACGATGGCATGTGTTGATTATGCAATGAAATCATGCAA                       | Ciona savignyi         |
| 1351111 | chromosome | 24               | 30416500  | 30416547  | 1  | AAATTAATGGTGCAATTTAGCTTTTATAATGTAATTTAATGATGCAA                 | Canis familiaris       |
| 1351111 | chromosome | 20               | 37158507  | 37158554  | 1  | AAATTAATGGTGCAATTTAGCTTTTATAATGTAATTTAATGATGCAA                 | Homo sapiens           |
| 1351111 | scaffold   | scaffold_75      | 107131    | 107178    | 1  | AAATTAATGGTGCAATTTAGCTTTTATAATGTAATTTAATGATGCAA                 | Takifugu rubripes      |
| 1351111 | chromosome | 9p               | 3236310   | 3236355   | -1 | AGTTAATGATGTCCTTTGTTGATATGTTGATTAATTAATGCAA                     | Ciona intestinalis     |
| 1351111 | scaffold   | scaffold_276     | 6470      | 6517      | -1 | AAATTAATGGTGCAATTTAGCTTTTATAATGTAATTTAATGATGCAA                 | Gasterosteus aculeatus |
| 1351111 | chromosome | 7                | 15132248  | 15132294  | 1  | AAATTAATGGTGCAATTTAGCTTTTATAATGTAATTTAATGATGCAA                 | Oryzias latipes        |
| 1351111 | toplevel   | 23               | 2250526   | 2250573   | -1 | AAATTAATGGTGCAATTTACACTGTATAATGTTAATTAATGATGCAA                 | Danio rerio            |
| 1351111 | chromosome | 2                | 158727271 | 158727318 | 1  | AAATTAATGGTGCAATTTAGCTTTTATAATGTAATTTAATGATGCAA                 | Mus musculus           |
| 1352843 | reflig     | reflig_209       | 87149     | 87192     | 1  | CAATTACACCTCGTCAAGTCCCTGTTTGTCAAGTAAAATTT                       | Ciona savignyi         |
| 1352843 | chromosome | 28               | 31171911  | 31171956  | 1  | CTGATATGACTAATAGCAAGTGCATGAAATGCTAATAGAAATTT                    | Canis familiaris       |
| 1352843 | chromosome | 10               | 119482500 | 119482545 | 1  | CTGATATGACTAATAGCAAGTGCATGAAATGCTAATAGAAATTT                    | Homo sapiens           |
| 1352843 | scaffold   | scaffold_53      | 1106558   | 1106603   | 1  | CAGATACGCTGGTAAACAAGTCCATGAAATTAAGTAAATTT                       | Takifugu rubripes      |
| 1352843 | chromosome | 2q               | 2868980   | 2869023   | 1  | CAATTACACCTGGTACTAAGTGCATGTTTGTCAAGTAAAATTT                     | Ciona intestinalis     |
| 1352843 | group      | groupVI          | 2672015   | 2672060   | 1  | CAGATATGGTGGTAAACAAGTCCATGAAATTAAGTAAATTT                       | Gasterosteus aculeatus |
| 1352843 | chromosome | 15               | 29784369  | 29784414  | -1 | CAGATATGGTGGTAAACAAGTCCATGAAATTAAGTAAATTT                       | Oryzias latipes        |
| 1352843 | toplevel   | 13               | 11960921  | 11960966  | 1  | CAGATATGCTAATAACAAGTCCATGAAATTAAGTAAATTT                        | Danio rerio            |
| 1352843 | chromosome | 19               | 59713742  | 59713786  | 1  | CTGATATGACTAATAGCAAGTGCATGAAATGCTAATAGAAATTT                    | Mus musculus           |
| 1350418 | reflig     | reflig_65        | 843844    | 843887    | -1 | AAACGATAGTTTTTAAATCGAATCTTTTCTGTAATTAATGTT                      | Ciona savignyi         |
| 1350418 | chromosome | 28               | 41540800  | 41540841  | 1  | AAATTTGAATGCAATTAAGATAATCTTTGATAATTAATGAA                       | Canis familiaris       |
| 1350418 | chromosome | 10               | 131581705 | 131581746 | 1  | AAATTTGAATGCAATTAAGATAATCTTTGATAATTAATGAA                       | Homo sapiens           |
| 1350418 | scaffold   | scaffold_97      | 430481    | 430522    | -1 | AAATTTGAATGCAATTAAGATAATCTTTGATAATTAATGAA                       | Takifugu rubripes      |
| 1350418 | chromosome | 8q               | 1649400   | 1649443   | -1 | AAACTAGGTTAATTAAGAACCTTCTCGTGAATTAATGTTG                        | Ciona intestinalis     |
| 1350418 | group      | groupIV          | 14121821  | 14121862  | 1  | AAATTTGAATGCAATTAAGATAATCTTTGATAATTAATGAA                       | Gasterosteus aculeatus |
| 1350418 | chromosome | 10               | 16881724  | 16881765  | 1  | AAATTTGAATGCAATTAAGATAATCTTTGATAATTAATGAA                       | Oryzias latipes        |
| 1350418 | toplevel   | 14               | 39203254  | 39203295  | 1  | AAATTTGAATGCAATTAAGATAATCTTTGATAATTAATGAA                       | Danio rerio            |
| 1350418 | chromosome | 7                | 144442366 | 144442407 | 1  | AAATTTGAATGCAATTAAGATAATCTTTGATAATTAATGAA                       | Mus musculus           |
| 1354116 | reflig     | reflig_20        | 373497    | 373536    | 1  | TATCTTTCGCGATTATACAAAACGTCAGTAAAGTTGATAGAT                      | Ciona savignyi         |
| 1354116 | chromosome | 5                | 75938033  | 75938074  | -1 | TATTTTCAAATGATTTCAAATAATGATTTAAGGGGATGAT                        | Canis familiaris       |
| 1354116 | chromosome | 16               | 77068601  | 77068642  | 1  | TATTTTCAAATGATTTCAAATAATGATTTAAGGGGATGAT                        | Homo sapiens           |
| 1354116 | scaffold   | scaffold_30      | 672665    | 672706    | 1  | TATTTTCAAATGATTTCAAATAATGATTTAAGGGGATGAT                        | Takifugu rubripes      |
| 1354116 | chromosome | 8q               | 4944001   | 4944040   | 1  | TATCTTTCAGATTATACCAACGAACTAAGCTGAAGAT                           | Ciona intestinalis     |
| 1354116 | group      | groupXIX         | 15524852  | 15524893  | 1  | TATTTTCAAATGATTTCAAATAATGATTTAAGGGGATGAT                        | Gasterosteus aculeatus |
| 1354116 | chromosome | 6                | 15918775  | 15918816  | -1 | TATTTTCAAATGATTTAAAATAATGATACATAAGCAGCCGAT                      | Oryzias latipes        |
| 1354116 | toplevel   | 25               | 29771475  | 29771516  | 1  | TATTTTCAAATGATTTCAAACCTGACGTAAGCAGTTGAT                         | Danio rerio            |
| 1354116 | chromosome | 8                | 117268987 | 117269028 | 1  | TATTTTCAAATGATTTCAAATAATGATTTAAGGGGATGAT                        | Mus musculus           |
| 1350077 | reflig     | reflig_37        | 108655    | 108697    | 1  | TAGAGTATCATTCTGATTCATCCGGCTTAATGTAATTAACA                       | Ciona savignyi         |
| 1350077 | chromosome | 22               | 28924487  | 28924529  | 1  | TAAAATCTAATCTGCTCATTAAAGGCTCACATAAATTAAGC                       | Canis familiaris       |
| 1350077 | chromosome | 13               | 71199279  | 71199321  | 1  | TAAAATCTAATCTGCTCATTAAAGGCTCACATAAATTAAGC                       | Homo sapiens           |
| 1350077 | scaffold   | scaffold_31      | 409134    | 409176    | -1 | TAAAATCTAATCTGCTCATTAAAGGCTCACATAAATTAAGC                       | Takifugu rubripes      |
| 1350077 | chromosome | 10p              | 954036    | 954078    | 1  | TAGAGTATCATTCTGCTCATTAAAGGCTCACATAAATTAAGC                      | Ciona intestinalis     |
| 1350077 | chromosome | 21               | 9488004   | 9488046   | 1  | TAAAATCTAATCTGCTCATTAAAGGCTCACATAAATTAAGC                       | Oryzias latipes        |
| 1350077 | group      | groupXVI         | 2722511   | 2722553   | -1 | TAAAATCTAATCTGCTCATTAAAGGCTCACATAAATTAAGC                       | Gasterosteus aculeatus |
| 1350077 | toplevel   | 9                | 24892408  | 24892450  | -1 | TAAAATCTAATCTGCTCATTAAAGGCTCACATAAATTAAGC                       | Danio rerio            |
| 1350077 | chromosome | 14               | 98446274  | 98446316  | 1  | TAAAATCTAATCTGCTCATTAAAGGCTCACATAAATTAAGC                       | Mus musculus           |
| 1353297 | reflig     | reflig_235       | 38311     | 38351     | 1  | TCGCTCCACGGGATTAAGTACGACGCTAAAGATATAAG                          | Ciona savignyi         |
| 1353297 | chromosome | 28               | 31705237  | 31705278  | 1  | CAACTACCACAATTAAGAGCTAATACAAACAAATATATA                         | Canis familiaris       |
| 1353297 | chromosome | 10               | 120066730 | 120066771 | 1  | CAACTACCACAATTAAGAGCTAATACAAACAAATATATA                         | Homo sapiens           |
| 1353297 | scaffold   | scaffold_53      | 1197227   | 1197268   | 1  | CCACTACCACAATTAAGGGCTAATACAAACAAATATATA                         | Takifugu rubripes      |
| 1353297 | chromosome | 9q               | 2332770   | 2332810   | -1 | TCACTCCACGGGATTAAGCGGACTTGTAAAGATATATA                          | Ciona intestinalis     |
| 1353297 | group      | groupVI          | 2766582   | 2766623   | 1  | CCACTACCACAATTAAGGGCTAATACAAACAAATATATA                         | Gasterosteus aculeatus |
| 1353297 | chromosome | 15               | 29604980  | 29605021  | -1 | CCACTACCACAATTAAGGGCTAATACAAACAAATATATA                         | Oryzias latipes        |
| 1353297 | toplevel   | 13               | 12344609  | 12344650  | 1  | CCACTACCACAATTAAGGGCTAATACAAACAAATATATA                         | Danio rerio            |
| 1353297 | chromosome | 19               | 60281574  | 60281615  | 1  | CAACTACCACAATTAAGAGCTAATACAAACAAATATATA                         | Mus musculus           |
| 1352188 | reflig     | reflig_0         | 116459    | 116499    | -1 | CACAGGCCACAGGTTAGCAGCTAACCAACTACTAATCAAC                        | Ciona savignyi         |
| 1352188 | chromosome | 36               | 21299307  | 21299346  | 1  | CACAGGCCACAGCAATTTCTAACCAATGACCACCTGAAC                         | Canis familiaris       |
| 1352188 | chromosome | 2                | 174750007 | 174750046 | 1  | CACAGGCCACAGCAATTTCTAACCAATGACCACCTGAAC                         | Homo sapiens           |
| 1352188 | scaffold   | scaffold_100     | 537862    | 537901    | -1 | CACAGGCCACAGCAATTTCTAACCAACCACTGAC                              | Takifugu rubripes      |
| 1352188 | chromosome | 10p              | 798728    | 798767    | 1  | CCAGGCCACAGGTTAGCGCTAACCAACTACTAATCAAC                          | Ciona intestinalis     |
| 1352188 | group      | groupXVI         | 10015908  | 10015947  | -1 | CACAGGCCACAGCAATTTCTAACCAACCGCCACTGAAC                          | Gasterosteus aculeatus |
| 1352188 | chromosome | 21               | 24314870  | 24314909  | 1  | CACAGGCCACCAATTTCTAACCAACCGCCACTGAAC                            | Oryzias latipes        |
| 1352188 | toplevel   | Zv7_scaffold2619 | 45963     | 46000     | -1 | CAGCCACGGCAATTTCTAACCAACCACTGAC                                 | Danio rerio            |

|         |            |              |           |           |    |                                                    |                        |
|---------|------------|--------------|-----------|-----------|----|----------------------------------------------------|------------------------|
| 1352188 | chromosome | 2            | 73018159  | 73018198  | 1  | CACAGGCACCAGCAATTTCTAACCAATGACCACCTGAAC            | Mus musculus           |
| 1352111 | reflig     | reflig_172   | 255102    | 255144    | 1  | TAATTTAGTTTGGAGCTTCAAACTATCACGTTTTCACA             | Ciona savignyi         |
| 1352111 | chromosome | 27           | 33017670  | 33017710  | -1 | TAATTAGTTTAAATTAACAAACAGCTAATAAAATTACACA           | Canis familiaris       |
| 1352111 | chromosome | 12           | 16833052  | 16833092  | 1  | TAATTAGTTTAAATTAACAAACAGCTAATAAAATTACACA           | Homo sapiens           |
| 1352111 | scaffold   | scaffold_14  | 107567    | 107607    | 1  | CAATTAGTTTAAATTAACAAACAGCTAATAAAATTGCACA           | Takifugu rubripes      |
| 1352111 | chromosome | 8q           | 3267484   | 3267526   | -1 | CAATTTAGTTGATTGAAGTTCAACAACGAATCACGATTTTCACA       | Ciona intestinalis     |
| 1352111 | group      | groupII      | 9881014   | 9881054   | 1  | CAATTAGTTTAAATTAACAAACAGCTAATAAAATTGCACA           | Gasterosteus aculeatus |
| 1352111 | chromosome | 3            | 18032030  | 18032070  | 1  | CAATTAGTTTAAATTAACAAACAGCTAATAAAATTGCACA           | Oryzias latipes        |
| 1352111 | toplevel   | 7            | 23643838  | 23643878  | -1 | CAATTAGTTTAAATTAACAAACAGCTAATAAAATTGCACA           | Danio rerio            |
| 1352111 | chromosome | 6            | 138531344 | 138531384 | 1  | TAATTAGTTTAAATTAACAAACAGCTAATAAAATTGCACA           | Mus musculus           |
| 1353651 | reflig     | reflig_375   | 91986     | 92027     | -1 | ATAAATATTTCTTTCAGAAATAAATAAAGCACCGACAAA            | Ciona savignyi         |
| 1353651 | chromosome | 9            | 26232197  | 26232237  | -1 | ACGAATGCATTTTCAGCAGAATAAATAACTTAATAACAAA           | Canis familiaris       |
| 1353651 | chromosome | 17           | 34972793  | 34972833  | 1  | ACGAATGCATTTTCAGCAGAATAAATAACTTAATAACAAA           | Homo sapiens           |
| 1353651 | scaffold   | scaffold_80  | 807953    | 807993    | -1 | ACAAATGAATTTTCAGCAGAATAAATAACTTAATAACAAA           | Takifugu rubripes      |
| 1353651 | chromosome | 4q           | 1822883   | 1822924   | 1  | ATAAATGAACATCTATCAGAATAAATAACTTAATAACAAA           | Ciona intestinalis     |
| 1353651 | group      | groupIII     | 1309797   | 13098037  | -1 | ACAAATGAATTTTCAGCAGAATAAATAACTTAATAACAAA           | Gasterosteus aculeatus |
| 1353651 | chromosome | 17           | 30337034  | 30337074  | 1  | ACAAATGAATTTTCAGCAGAATAAATAACTTAATAACAAA           | Oryzias latipes        |
| 1353651 | toplevel   | 24           | 30905730  | 30905770  | 1  | ACAAATGAATTTTCAGCAGAATAAATAACTTAATAACAAA           | Danio rerio            |
| 1353651 | chromosome | 11           | 98145075  | 98145115  | 1  | ACGAATGCATTTTCAGCAGAATAAATAACTTAATAACAAA           | Mus musculus           |
| 1349971 | reflig     | reflig_2     | 2024168   | 2024207   | -1 | TGGCAAGTTGCTGGAAAACGGCAAAATGCTCCGGTATC             | Ciona savignyi         |
| 1349971 | chromosome | 15           | 46500351  | 46500391  | -1 | TGGCAATATGTTTAGAAAACAGTAAATGCTTGTGTAATA            | Canis familiaris       |
| 1349971 | chromosome | 4            | 145846653 | 145846693 | -1 | TGGCAATATGTTTAGAAAACAGTAAATGCTTGTGTAATA            | Homo sapiens           |
| 1349971 | scaffold   | scaffold_17  | 1291164   | 1291204   | -1 | TGGCAACATGTTTAGAAAACATCAAATGCTTGTGTAATA            | Takifugu rubripes      |
| 1349971 | chromosome | 7q           | 4546946   | 4546986   | 1  | TGGCAGAGAGCTTGGAAAATGGCAAACTGCTCCGGAATA            | Ciona intestinalis     |
| 1349971 | group      | groupX       | 6996427   | 6996467   | 1  | TGGCAACATGTTTAGAAAACATCAAATGCTTGTGTAATA            | Gasterosteus aculeatus |
| 1349971 | chromosome | 1            | 22058323  | 22058363  | -1 | TGGCAACATGTTTAGAAAACATCAAATGCTTGTGTAATA            | Oryzias latipes        |
| 1349971 | toplevel   | 1            | 34730828  | 34730867  | -1 | TGGCAGCAAGTTGAAAACATGAAATGCTTGTGTAATA              | Danio rerio            |
| 1349971 | chromosome | 8            | 82522644  | 82522684  | 1  | TGGCAATATGTTTAGAAAACAGTAAATGCTTGTGTAATA            | Mus musculus           |
| 1353047 | reflig     | reflig_14    | 894552    | 894588    | -1 | AAACATGTTTGGCAAGGTGATTAATCCTGCTTGAC                | Ciona savignyi         |
| 1353047 | chromosome | 6            | 18672390  | 18672426  | -1 | AAGCACGTTTTCAGCAAGGTGATAAGTCAGTTTAAAT              | Canis familiaris       |
| 1353047 | chromosome | 7            | 1234945   | 1234981   | 1  | AAGCACGTTTTCAGCAAGGTGATAAGTCAGTTTAAAT              | Homo sapiens           |
| 1353047 | scaffold   | scaffold_15  | 765095    | 765131    | 1  | AAGCACGTTTTCAGCAAGGTGATAAGTCAGTTTAAAT              | Takifugu rubripes      |
| 1353047 | chromosome | 1p           | 2720534   | 2720573   | 1  | AAACATGTTTGGCAAGGTGATTAATCCTGCTTGAC                | Ciona intestinalis     |
| 1353047 | group      | groupXI      | 14171730  | 14171766  | 1  | AAGCACGTTTTCAGCAAGGTGATAAGTCAGTTTAAAT              | Gasterosteus aculeatus |
| 1353047 | chromosome | 8            | 7504886   | 7504922   | -1 | AAGCACGTTTTCAGCAAGGTGATAAGTCAGTTTAAAT              | Oryzias latipes        |
| 1353047 | toplevel   | 3            | 41260518  | 41260554  | -1 | AAGCACGTTTTCAGCAAGGTGATAAGTCAGTTTAAAT              | Danio rerio            |
| 1353047 | chromosome | 5            | 140015368 | 140015404 | 1  | AAGCACGTTTTCAGCAAGGTGATAAGTCAGTTTAAAT              | Mus musculus           |
| 1353058 | reflig     | reflig_1     | 2399033   | 2399073   | 1  | CTGTAATGTCATTTTCCCAATTAATTTGCCCAGCGCAG             | Ciona savignyi         |
| 1353058 | chromosome | 2            | 82689563  | 82689602  | 1  | GTGAAAATGCATTTTAAATTAATTTGATCCTGCATG               | Canis familiaris       |
| 1353058 | chromosome | 1            | 18967939  | 18967978  | -1 | GTGAAAATGCATTTTAAATTAATTTGATCCTGCATG               | Homo sapiens           |
| 1353058 | scaffold   | scaffold_56  | 1262550   | 1262589   | -1 | GTGAAAATGCATTTTAAATTAATTTGATCCTGCATG               | Takifugu rubripes      |
| 1353058 | chromosome | 3p           | 1225870   | 1225909   | 1  | CTGTAATGTCATTTTCCCAATTAATTTGACCAGCGCG              | Ciona intestinalis     |
| 1353058 | scaffold   | scaffold_27  | 5042926   | 5042965   | 1  | GTGAAAATGCATTTTAAATTAATTTGATCCTGCATG               | Gasterosteus aculeatus |
| 1353058 | chromosome | 5            | 7454421   | 7454460   | -1 | GTGAAAATGCATTTTAAATTAATTTGATCCTGCATG               | Oryzias latipes        |
| 1353058 | toplevel   | 11           | 39887530  | 39887569  | 1  | GTGAAAATGCATTTTAAATTAATTTGATCCTGCATG               | Danio rerio            |
| 1353058 | chromosome | 4            | 139281358 | 139281397 | 1  | GTGAAAATGCATTTTAAATTAATTTGATCCTGCATG               | Mus musculus           |
| 1352540 | reflig     | reflig_14    | 1100813   | 1100864   | -1 | CAATTTTCGTCATTAACAGCAATAAAGCGAATAAAGCGCT           | Ciona savignyi         |
| 1352540 | chromosome | 4            | 29321323  | 29321371  | 1  | TAATTTGATAAATCATCAGCAGAAAATAACTGGATGTCAAACATTC     | Canis familiaris       |
| 1352540 | chromosome | 10           | 77397333  | 77397381  | 1  | TAATTTGATAAATCATCAGCAGAAAATAACTGGATGTCAAACATTC     | Homo sapiens           |
| 1352540 | scaffold   | scaffold_59  | 1337780   | 1337828   | 1  | TAATTTGATAAATCATCAGCAGAAAATAACTGGATGTCAAACATTC     | Takifugu rubripes      |
| 1352540 | chromosome | 1q           | 1037133   | 1037183   | -1 | TAATTTGCACATTAACAGCAATAAAGCGAATAAAGCGCGCA          | Ciona intestinalis     |
| 1352540 | chromosome | 19           | 9344897   | 9344945   | -1 | TAATTTGATAAATCATCAGCAGAAAATAACTGGATGTCAAACATTC     | Oryzias latipes        |
| 1352540 | group      | groupV       | 393489    | 393537    | -1 | TAATTTGATAAATCATCAGCAGAAAATAACTGGATGTCAAACATTC     | Gasterosteus aculeatus |
| 1352540 | toplevel   | 13           | 15338542  | 15338590  | 1  | TAATTTGATAAATCATCAGCAGAAAATAACTGGATGTCAAACATTC     | Danio rerio            |
| 1352540 | chromosome | 14           | 23325050  | 23325098  | 1  | TAATTTGATAAATCATCAGCAGAAAATAACTGGATGTCAAACATTC     | Mus musculus           |
| 1352116 | reflig     | reflig_172   | 255104    | 255146    | -1 | CGTGTGAAAACGTGATAAGTTTGAAGCCTCAATCAAATAAT          | Ciona savignyi         |
| 1352116 | chromosome | 2            | 67434665  | 67434703  | -1 | CATTTTAAATGATTAGAGTAAATTAATCAATGTAAT               | Canis familiaris       |
| 1352116 | chromosome | 16           | 49406593  | 49406631  | 1  | CATTTTAAATGATTAGAGTAAATTAATCAATGTAAT               | Homo sapiens           |
| 1352116 | scaffold   | scaffold_28  | 636787    | 636825    | 1  | CATTTGAAATGATTGGTGTAAATGAAATCAATGTCAT              | Takifugu rubripes      |
| 1352116 | chromosome | 8q           | 3267482   | 3267524   | 1  | CGTGTGAAATCGTGTTCGTTGTTGAATCAATCAAATAAT            | Ciona intestinalis     |
| 1352116 | chromosome | 3            | 29411030  | 29411068  | -1 | CCTTTGAAATGATTGGTGTAAATGAAATCAATGTCAT              | Oryzias latipes        |
| 1352116 | group      | groupII      | 17841808  | 17841846  | -1 | CGTTCGAAATGATCGGTTGTAATGAAATCAATGTCAT              | Gasterosteus aculeatus |
| 1352116 | toplevel   | 7            | 25949775  | 25949811  | 1  | TTTGAATGATTGGTGTAAATGAAATCAATGTCAT                 | Danio rerio            |
| 1352116 | chromosome | 8            | 91282522  | 91282560  | 1  | CATTTTAAATGATTAGAGTAAATTAATCAATGTAAT               | Mus musculus           |
| 1352362 | reflig     | reflig_1     | 122488    | 122528    | -1 | TCGCTTACAGAATTAATTTCTCCGCGCGGATTAGG                | Ciona savignyi         |
| 1352362 | chromosome | 14           | 25022918  | 25022957  | 1  | TTGCCAGCAAAATAGCTGTTATTACTGCTACTGTTTGT             | Canis familiaris       |
| 1352362 | chromosome | 7            | 96481341  | 96481380  | 1  | TTGCCAGCAAAATAGCTGTTATTACTGCTACTGTTTGT             | Homo sapiens           |
| 1352362 | scaffold   | scaffold_292 | 287318    | 287357    | -1 | TCGCTTACAGAATTAATTTCTCCGCGCGGATTAGG                | Takifugu rubripes      |
| 1352362 | scaffold   | scaffold_237 | 34451     | 34491     | 1  | TCGCTTACAGAATTAATTTCTCCGCGCGGATTAGG                | Ciona intestinalis     |
| 1352362 | group      | groupX       | 9485572   | 9485611   | 1  | TTGCCAGCAAAATAGCTGTTATTACTGCTACTGTTTGT             | Gasterosteus aculeatus |
| 1352362 | chromosome | 11           | 9808775   | 9808814   | 1  | TTGCCAGCAAAATAGCTGTTATTACTGCTACTGTTTGT             | Oryzias latipes        |
| 1352362 | toplevel   | 19           | 38250562  | 38250599  | 1  | GCCTGCAAAATAGCGCTTATTACTGCTACTGTTTGT               | Danio rerio            |
| 1352362 | chromosome | 6            | 6821660   | 6821699   | 1  | TTGCCAGCAAAATAGCTGTTATTACTGCTACTGTTTGT             | Mus musculus           |
| 1350896 | reflig     | reflig_281   | 55642     | 55689     | -1 | GTATGTCATTAATTTTTCGGCCTACCAATTTGTTTGTTCACAGT       | Ciona savignyi         |
| 1350896 | chromosome | 9            | 61084548  | 61084595  | 1  | GTGAAACAATTAGAATTTCTGCCTATTATCATGGTAATCTTATCAGT    | Canis familiaris       |
| 1350896 | chromosome | 9            | 127181607 | 127181654 | -1 | GTGAAACAATTAGAATTTCTGCCTATTATCATGGTAATCTTATCAGT    | Homo sapiens           |
| 1350896 | scaffold   | scaffold_18  | 637682    | 637729    | -1 | GTGAAACAATTAGAATTTCTGCCTATTATCATGGTAATCTTATCAGT    | Takifugu rubripes      |
| 1350896 | chromosome | 1q           | 3808425   | 3808472   | -1 | GTGTCOAATTAATTTTGTTCGGCATCAATCATGTTTGTTCACAGT      | Ciona intestinalis     |
| 1350896 | group      | groupXIII    | 13458012  | 13458059  | -1 | GTGAAACAATTAGAATTTCTGCCTATTATCATGGTAATCTTATCAGT    | Gasterosteus aculeatus |
| 1350896 | chromosome | 9            | 18840212  | 18840259  | -1 | GTGAAACAATTAGAATTTCTGCCTATTATCATGGTAATCTTATCAGT    | Oryzias latipes        |
| 1350896 | toplevel   | 8            | 33470485  | 33470532  | -1 | GTGAAACAATTAGAATTTCTGCCTATTATCATGGTAATCTTATCAGT    | Danio rerio            |
| 1350896 | chromosome | 2            | 34521012  | 34521059  | 1  | GAGAAAACAATTAGAATTTCTGCCTATTATCATGGTAATCTTATCAGC   | Mus musculus           |
| 1353655 | reflig     | reflig_48    | 1877135   | 1877187   | 1  | ATTTACTCATAAATCAGCACTTATGAGCTGCAATGATGTCTATAAT     | Ciona savignyi         |
| 1353655 | chromosome | 4            | 29321243  | 29321294  | 1  | ACTTACTTAAATCAATCCACTTTGGCATCATTATCATGTATCAACATAAT | Canis familiaris       |
| 1353655 | chromosome | 10           | 77397253  | 77397304  | 1  | ACTTACTTAAATCAATCCACTTTGGCATCATTATCATGTATCAACATAAT | Homo sapiens           |
| 1353655 | scaffold   | scaffold_59  | 1337700   | 1337751   | 1  | ACTTACTTAAATCAATCCACTTTGGCATCATTATCATGTATCAACATAAT | Takifugu rubripes      |
| 1353655 | scaffold   | scaffold_67  | 411082    | 411133    | -1 | ACTTACTTAAATCAATCCACTTTGGCATCATTATCATGTATCAACATAAT | Ciona intestinalis     |
| 1353655 | chromosome | 19           | 9344974   | 9345025   | -1 | ACTTACTTAAATCAATCCACTTTGGCATCATTATCATGTATCAACATAAT | Oryzias latipes        |
| 1353655 | group      | groupV       | 393566    | 393617    | -1 | ACTTACTTAAATCAATCCACTTTGGCATCATTATCATGTATCAACATAAT | Gasterosteus aculeatus |
| 1353655 | toplevel   | 13           | 15338462  | 15338513  | 1  | ACTTACTTAAATCAATCCACTTTGGCATCATTATCATGTATCAACATAAT | Danio rerio            |

|         |            |              |           |           |    |                                                      |                        |
|---------|------------|--------------|-----------|-----------|----|------------------------------------------------------|------------------------|
| 1353655 | chromosome | 14           | 23324970  | 23325021  | 1  | ACTTACTTAAAATCAACTCCACTTTGGCATCATTATCATGTATCAACATAAT | Mus musculus           |
| 1351739 | reflig     | reflig_268   | 28496     | 28540     | -1 | ACAACAAGCGATTACCCATTTAAGTGGCTAACCGTAATTTGAT          | Ciona savignyi         |
| 1351739 | chromosome | 36           | 20514515  | 20514555  | 1  | CTAGAAGTCATTTCTTTTCAAAGGCAAATGTTATTTAAT              | Canis familiaris       |
| 1351739 | chromosome | 2            | 173823182 | 173823222 | 1  | CTAGAAGTCATTTCTTTTCAAAGGCAAATGTTATTTAAT              | Homo sapiens           |
| 1351739 | scaffold   | scaffold_100 | 599251    | 599291    | -1 | CCAGAAGTCATTTCTTTTCAAAGGCAAACGTTATTTAAT              | Takifugu rubripes      |
| 1351739 | chromosome | 1p           | 2567498   | 2567540   | 1  | ACAAAAGTCAGCCCTCATTAAAATGGCTAACTGTAACCTAAT           | Ciona intestinalis     |
| 1351739 | group      | groupXVI     | 10089152  | 10089192  | -1 | CCAGAAGTCATTTCTTTTCAAAGGCAAACGTTATTTAAT              | Gasterosteus aculeatus |
| 1351739 | chromosome | 21           | 24218194  | 24218233  | 1  | CCAGAAGTCATTTCTTTTCAAAGGCAAACGTTATTTAAT              | Oryzias latipes        |
| 1351739 | toplevel   | 9            | 3495094   | 3495134   | 1  | CCAGAAGTCATTTCTTTTCAAAGGCAAATGTTATTTAAT              | Danio rerio            |
| 1351739 | chromosome | 2            | 72264755  | 72264795  | 1  | CTAGAAGTCATTTCTTTTCAAAGGCAAATGTTATTTAAT              | Mus musculus           |
| 1350930 | reflig     | reflig_54    | 2658010   | 2658051   | 1  | AATCCTACTGAATTTTGAAAAGCAGCATCAATTTATGATGG            | Ciona savignyi         |
| 1350930 | chromosome | 5            | 80954870  | 80954912  | -1 | AATCAAGGTGAATTTTCAAAGGCTGCCATTTTGGAAATTATGC          | Canis familiaris       |
| 1350930 | chromosome | 16           | 70833511  | 70833553  | -1 | AATCAAGGTGAATTTTCAAAGGCTGCCATTTTGGAAATTATGC          | Homo sapiens           |
| 1350930 | scaffold   | scaffold_14  | 789771    | 789813    | -1 | AATCAAGGTGAATTTTCAAAGGCTGCCATTTTCAAATGATGG           | Takifugu rubripes      |
| 1350930 | chromosome | 12q          | 2285249   | 2285290   | 1  | AATCCAAGTGAATTTTCAAAGGCAAGCTAATGATTTGATGG            | Ciona intestinalis     |
| 1350930 | group      | groupII      | 10691185  | 10691227  | -1 | AATCAAGGTGAATTTTCAAAGGCTGCCATTTTCAAATGATGG           | Gasterosteus aculeatus |
| 1350930 | chromosome | 3            | 19082839  | 19082881  | -1 | AATCAAGGTGAATTTTCAAAGGCTGCCATTTTCAAATGATGG           | Oryzias latipes        |
| 1350930 | toplevel   | 7            | 62447145  | 62447187  | 1  | AATCAAGGTGAATTTTCAAAGGCTGCCATTTTCAAATGATGG           | Danio rerio            |
| 1350930 | chromosome | 8            | 111941220 | 111941262 | 1  | AATCAAGGTGAATTTTCAAAGGCTGCCATTTTGGAAATTATGC          | Mus musculus           |
| 1350807 | reflig     | reflig_9     | 2293800   | 2293834   | 1  | TTATCCAGAACTCAATGTTTTCATGCTGTTATAA                   | Ciona savignyi         |
| 1350807 | chromosome | 19           | 48758465  | 48758504  | 1  | TTATGTTATAATCCAAGTCTGCTCATTGTCACAGCCAA               | Canis familiaris       |
| 1350807 | chromosome | 2            | 144159021 | 144159060 | 1  | TTATGTTATAATCCAAGTCTGCTCATTGTCACAGCCAA               | Homo sapiens           |
| 1350807 | scaffold   | scaffold_110 | 508061    | 508100    | -1 | TTATGTTATAATCCAAGTCTGCTCATTGTCACAGCCAA               | Takifugu rubripes      |
| 1350807 | scaffold   | scaffold_161 | 130530    | 130569    | 1  | TTATCTAGAATCAATGTTTCCCTTTGTTATAGACAA                 | Ciona intestinalis     |
| 1350807 | chromosome | 2            | 5295410   | 5295449   | 1  | TTATGTTATAATCCAAGTCTGCTCATTGTCACAGCCAA               | Oryzias latipes        |
| 1350807 | group      | groupI       | 28060937  | 28060976  | 1  | TTATGTTATAATCCAAGTCTGCTCATTGTCACAGCCAA               | Gasterosteus aculeatus |
| 1350807 | toplevel   | Zv7_NA1298   | 53651     | 53688     | 1  | ATCTTATAATCCAAGTCTGCTCATTGTCACAGCCAA                 | Danio rerio            |
| 1350807 | chromosome | 2            | 44160384  | 44160423  | 1  | TTATGTTATAATCCAAGTCTGCTCATTGTCACAGCCAA               | Mus musculus           |
| 1352542 | reflig     | reflig_19    | 3623474   | 3623524   | -1 | GAGATAGCTAATGCAATGACCGGTATAAATAGAGCCAGCTGTAGC        | Ciona savignyi         |
| 1352542 | chromosome | 15           | 48058757  | 48058807  | -1 | TAATGACGGCTAATTTTCGATCAGATATAAATAGAGCCCCAACAGTTATT   | Canis familiaris       |
| 1352542 | chromosome | 4            | 147793810 | 147793860 | -1 | TAATGACGGCTAATTTTCGATCAGATATAAATAGAGCCCCAACAGTTATT   | Homo sapiens           |
| 1352542 | scaffold   | scaffold_17  | 1505571   | 1505622   | -1 | TAATGACGGCTAATTTTCGATCAGATATAAATAGAGCCCCAACAGTTATT   | Takifugu rubripes      |
| 1352542 | chromosome | 2q           | 3796598   | 3796647   | 1  | TAGGAACGGCTAATTCGCGGAAACCGGTATAAATAGAGCCAGCTGTACT    | Ciona intestinalis     |
| 1352542 | group      | groupIX      | 6738463   | 6738514   | 1  | TAATGACGGCTAATTTTCGATCAGATATAAATAGAGCCCCAACAGTTATT   | Gasterosteus aculeatus |
| 1352542 | chromosome | 1            | 22407768  | 22407819  | -1 | TAATGACGGCTAATTTTCGATCAGATATAAATAGAGCCCCAACAGTTATT   | Oryzias latipes        |
| 1352542 | toplevel   | 1            | 35364505  | 35364556  | -1 | TAATGACGGCTAATTTTCGATCAGATATAAATAGAGCCCCAACAGTTATT   | Danio rerio            |
| 1352542 | chromosome | 8            | 80945963  | 80946013  | 1  | TAATGACGGCTAATTTTCGATCAGATATAAATAGAGCCCCAACAGTTATT   | Mus musculus           |
| 1351751 | reflig     | reflig_48    | 3516996   | 3517041   | 1  | TTTTTTCATGCTCCGATGTAATAGCGGGGCGAGTACGAAGTTGAAA       | Ciona savignyi         |
| 1351751 | chromosome | 3            | 18321630  | 18321674  | 1  | TTTGTCTGCTGTTTATGATGAATGAAGCAAGCAAAAAGGAGA           | Canis familiaris       |
| 1351751 | chromosome | 5            | 93253492  | 93253536  | -1 | TTTTGTCCTGCTGTTTATGATGAATGAAGCAAGCAAAAAGGAGA         | Homo sapiens           |
| 1351751 | scaffold   | scaffold_101 | 510819    | 510863    | 1  | TTTTGTCCTGCTGTTTATGATGAATGAAGCAAGCAAAAAGGAGA         | Takifugu rubripes      |
| 1351751 | chromosome | 5q           | 2568567   | 2568611   | -1 | TTTTTTCATGTTCCGATGTAATAGCAGCAAGTACTAAGTTGAAA         | Ciona intestinalis     |
| 1351751 | group      | groupXIII    | 11097881  | 11097925  | -1 | TTTTGTCCTGCTGTTTATGATGAATGAAGCAAGCAAAAAGGAGA         | Gasterosteus aculeatus |
| 1351751 | chromosome | 9            | 15510424  | 15510468  | -1 | TTTTGTCCTGCTGTTTATGATGAATGAAGCAAGCAAAAAGGAGA         | Oryzias latipes        |
| 1351751 | toplevel   | 5            | 46568889  | 46568933  | 1  | TTTTGTCCTGCTGTTTATGATGAATGAAGCAAGCAAAAAGGAGA         | Danio rerio            |
| 1351751 | chromosome | 13           | 78032019  | 78032063  | 1  | TTTTGTCCTGCTGTTTATGATGAATGAAGCAAGCAAAAAGGAGA         | Mus musculus           |
| 1353498 | reflig     | reflig_14    | 664639    | 664680    | 1  | ACTGTTGCCAATCTCTTAATTTATGTTTGTCAATAGCAAA             | Ciona savignyi         |
| 1353498 | chromosome | 14           | 56795965  | 56796006  | 1  | ACTGCTCATTGCTCATTAAATATAAAATATCATATTCAGA             | Canis familiaris       |
| 1353498 | chromosome | 7            | 114088239 | 114088280 | 1  | ACTGCTCATTGCTCATTAAATATAAAATATCATATTCAGA             | Homo sapiens           |
| 1353498 | scaffold   | scaffold_8   | 3086013   | 3086054   | -1 | ACTGCTCATTGCTCATTAAATATAAAATATCATATTCAGA             | Takifugu rubripes      |
| 1353498 | chromosome | 1q           | 1951412   | 1951453   | -1 | ACTGTTACTTATCTCTAATATATATTTGTCATAAGCAAA              | Ciona intestinalis     |
| 1353498 | group      | groupIV      | 19051005  | 19051046  | -1 | ACTGCTCATTGCTCATTAAATATAAAATATCATATTCAGA             | Gasterosteus aculeatus |
| 1353498 | chromosome | 23           | 4508781   | 4508822   | -1 | ACTGCTCATTGCTCATTAAATATAAAATATCATATTCAGA             | Oryzias latipes        |
| 1353498 | toplevel   | 4            | 40363406  | 40363447  | 1  | ACTGCTCATTGCTCATTAAATATAAAATATCATATTCAGA             | Danio rerio            |
| 1353498 | chromosome | 6            | 15362651  | 15362692  | 1  | ACTGCTCATTGCTCATTAAATATAAAATATCATATTCAGA             | Mus musculus           |
| 1351484 | reflig     | reflig_131   | 89964     | 90007     | 1  | CTGTCTTCCGTTCTCTCTTATTCGTGAATCCATTTCCACA             | Ciona savignyi         |
| 1351484 | chromosome | 22           | 48663193  | 48663237  | 1  | TCAATATCCCCTCTCTCATTATCTGTTGGATTGCACATCCACA          | Canis familiaris       |
| 1351484 | chromosome | 13           | 94416908  | 94416952  | 1  | TCAATATCCCCTCTCTCATTATCTGTTGGATTGCACATCCACA          | Homo sapiens           |
| 1351484 | scaffold   | scaffold_103 | 117085    | 117129    | -1 | TCAATATCCCCTCTCTCATTATCTGTTGGATTGCACATCCACA          | Takifugu rubripes      |
| 1351484 | chromosome | 7q           | 1593023   | 1593066   | 1  | TCACTTTCCGTTCTCTCTTATTTGAGAATTCATTTCCACA             | Ciona intestinalis     |
| 1351484 | group      | groupXVI     | 9268709   | 9268753   | 1  | TCAATATCCCCTCTCTCATTATCTGTTGGATTGCACATCCACA          | Gasterosteus aculeatus |
| 1351484 | chromosome | 21           | 25474839  | 25474883  | -1 | TCAATATCCCCTCTCTCATTATCTGTTGGATTGCACATCCACA          | Oryzias latipes        |
| 1351484 | toplevel   | 14           | 2403074   | 2403119   | -1 | TCAATATCCCCTCTCTCATTATCTGTTGGATTGCACATCCACA          | Danio rerio            |
| 1351484 | chromosome | 14           | 118835136 | 118835180 | 1  | TCAATATCCCCTCTCTCATTATCTGTTGGATTGCACATCCACA          | Mus musculus           |
| 1350371 | reflig     | reflig_90    | 316408    | 316448    | 1  | CAATCTAATCGAAGAATTAAGCAATGCATAAATATAGC               | Ciona savignyi         |
| 1350371 | chromosome | 22           | 28924489  | 28924529  | 1  | AAATCTAATCTCGATTCTAATAGGCTCACATAAATTAAGC             | Canis familiaris       |
| 1350371 | chromosome | 13           | 71199281  | 71199321  | 1  | AAATCTAATCTCGATTCTAATAGGCTCACATAAATTAAGC             | Homo sapiens           |
| 1350371 | scaffold   | scaffold_31  | 409134    | 409174    | -1 | AAATCTAATCTCGATTCTAATAGGCTCACATAAATTAAGC             | Takifugu rubripes      |
| 1350371 | chromosome | 4q           | 5687507   | 5687547   | 1  | CGATCTAATCAAGCAATTAATAGCAATACATAAATATAGC             | Ciona intestinalis     |
| 1350371 | chromosome | 21           | 9488006   | 9488046   | 1  | AAATCTAATCTCGATTCTAATAGGCTCACATAAATTAAGC             | Oryzias latipes        |
| 1350371 | group      | groupXVI     | 2722511   | 2722551   | -1 | AAATCTAATCTCGATTCTAATAGGCTCACATAAATTAAGC             | Gasterosteus aculeatus |
| 1350371 | toplevel   | 9            | 24892408  | 24892448  | -1 | AAATCTAATCTCGATTCTAATAGGCTCACATAAATTAAGC             | Danio rerio            |
| 1350371 | chromosome | 14           | 98446276  | 98446316  | 1  | AAATCTAATCTCGATTCTAATAGGCTCACATAAATTAAGC             | Mus musculus           |
| 1351743 | reflig     | reflig_3     | 1183158   | 1183201   | -1 | ATTTGTGATGTTTTTCAATTCGCTAAATTTGCCGACAGATTTATT        | Ciona savignyi         |
| 1351743 | chromosome | 22           | 52785243  | 52785289  | 1  | GTCTTTGATGGTTTATATTTATGCAAAATCTCTAGATATGATTTACC      | Canis familiaris       |
| 1351743 | chromosome | 13           | 99312290  | 99312336  | 1  | GTCTTTGATGGTTTATATTTATGCAAAATCTCTAGATATGATTTACC      | Homo sapiens           |
| 1351743 | scaffold   | scaffold_31  | 524379    | 524425    | 1  | GTCTTTGATGGTTTATATTTATGCAAAATCTAGCAGATATGATTTATT     | Takifugu rubripes      |
| 1351743 | chromosome | 4q           | 1354083   | 1354126   | -1 | GTTTGTGATGTTTTTCAATTCGCCAAATCTGCCGATGGATTTATT        | Ciona intestinalis     |
| 1351743 | chromosome | 21           | 9274507   | 9274553   | -1 | GTCTTTGATGGTTTATATTTATGCAAAATCTCTAGATATGATTTATT      | Oryzias latipes        |
| 1351743 | group      | groupXVI     | 2845296   | 2845342   | 1  | GTCTTTGATGGTTTATATTTATGCAAAATCTCTAGATATGATTTATT      | Gasterosteus aculeatus |
| 1351743 | toplevel   | 9            | 25186295  | 25186340  | 1  | GTCTTTGATGGTTTATATTTATGCAAAATCTCTAGATATGATTTATT      | Danio rerio            |
| 1351743 | chromosome | 14           | 122774095 | 122774141 | 1  | GTCTTTGATGGTTTATATTTATGCAAAATCTCTAGATATGATTTACC      | Mus musculus           |
| 1353914 | reflig     | reflig_27    | 1802645   | 1802684   | 1  | TTTCACTTCACTGTTCTCTCTATTTTAAATCAAGCGAC               | Ciona savignyi         |
| 1353914 | chromosome | 9            | 60663613  | 60663656  | 1  | TTCAATCTCACCTCATCTCCACTACATAAACCCCTGGCAA             | Canis familiaris       |
| 1353914 | chromosome | 9            | 127645984 | 127646027 | -1 | TTCAATCTCACCTCATCTCCACTACATAAACCCCTGGCAA             | Homo sapiens           |
| 1353914 | scaffold   | scaffold_18  | 737856    | 737899    | -1 | TTCAATCTCACCTCATCTCCACTACATAAACCCCTGGCAA             | Takifugu rubripes      |
| 1353914 | chromosome | 1q           | 4863406   | 4863445   | 1  | TTACTCTCACCTGTTCTCTCTATTTTAACTACCTGGAA               | Ciona intestinalis     |
| 1353914 | group      | groupXIII    | 13552526  | 13552569  | -1 | TTCAATCTCACCTCATCTCCACTACATAAACCCCTGGCAA             | Gasterosteus aculeatus |
| 1353914 | chromosome | 9            | 18956250  | 18956293  | -1 | TTCAATCTCACCTCATCTCCACTACATAAACCCCTGGCAA             | Oryzias latipes        |
| 1353914 | toplevel   | 8            | 32412548  | 32412589  | -1 | CAATATCACCTCATCTCCACTAGTACATAAACCCCTGGCAA            | Danio rerio            |

|         |            |              |           |           |    |                                                     |                        |
|---------|------------|--------------|-----------|-----------|----|-----------------------------------------------------|------------------------|
| 1353914 | chromosome | 2            | 34144158  | 34144201  | 1  | TTCAATCTCACCTACTCTCCACTACATTAACCCCTGGCAA            | Mus musculus           |
| 1352645 | reflig     | reftig_41    | 258045    | 258083    | 1  | GACTGCAAAATGAAAGATAATCACATTACGCCTATTGTT             | Ciona savignyi         |
| 1352645 | chromosome | 36           | 20514701  | 20514742  | 1  | GGCTGAGAAAATGAGAGCTAATTTTCACTGCCTCATGTC             | Canis familiaris       |
| 1352645 | chromosome | 2            | 173823368 | 173823409 | 1  | GGCTGAGAAAATGAGAGCTAATTTTCACTGCCTCATGTC             | Homo sapiens           |
| 1352645 | scaffold   | scaffold_100 | 599063    | 599105    | -1 | GGCTGAGAAAATGAGAGCTAATTTTCCCTGCCTGGTGTG             | Takifugu rubripes      |
| 1352645 | chromosome | 4q           | 4913960   | 4914001   | -1 | GACAGAGAAAATTAAGTGTGATTACGTTTCCGCCCTTTTGTG          | Ciona intestinalis     |
| 1352645 | group      | groupXVI     | 10088964  | 10089006  | -1 | GGCTGAGAAAATGAGAGCTAATTTTCCCTGCCTGGTGTG             | Gasterosteus aculeatus |
| 1352645 | chromosome | 21           | 24218379  | 24218421  | 1  | GGCTGAGAAAATGAGAGCTAATTTTCCCTGCCTGGTGTG             | Oryzias latipes        |
| 1352645 | toplevel   | 9            | 3495282   | 3495322   | 1  | CTGAGAAAATGAGAGCTAATTTTCCCTGCCTGGTGTG               | Danio rerio            |
| 1352645 | chromosome | 2            | 72264941  | 72264982  | 1  | GGCTGAGAAAATGAGAGCTAATTTTCACTGCCTCATGTC             | Mus musculus           |
| 1351357 | reflig     | reftig_148   | 64002     | 64043     | 1  | CAGATTGGCATATGATCCATTGTGAAACCTGAACATGTAAC           | Ciona savignyi         |
| 1351357 | chromosome | 28           | 4306495   | 4306534   | -1 | CAGATTATGTGATCCTGATTATAAATCTGAACATGAATC             | Canis familiaris       |
| 1351357 | chromosome | 10           | 50267214  | 50267253  | -1 | CAGATTATGTGATCCTGATTATAAATCTGAACATGAATC             | Homo sapiens           |
| 1351357 | scaffold   | scaffold_24  | 778986    | 779025    | -1 | CCGATTAAAAGAGAAAACATGCTAATTAATCTGAACATGAATC         | Takifugu rubripes      |
| 1351357 | chromosome | 8q           | 3737412   | 3737453   | -1 | CAGATTGCCATATGATCCATTATACGACAGAACATGTAAC            | Ciona intestinalis     |
| 1351357 | group      | groupVI      | 8146838   | 8146877   | 1  | CCGATTACACATTCTCTATTATAAATCTGAACATGAATC             | Gasterosteus aculeatus |
| 1351357 | chromosome | 15           | 23041792  | 23041831  | -1 | CCGATTACAGATTCTCTATTATAAATCTGAACATGAATC             | Oryzias latipes        |
| 1351357 | toplevel   | 13           | 30384337  | 30384374  | 1  | GATTACCCGATTCCTATTATAAATCTGAACATGAATC               | Danio rerio            |
| 1351357 | chromosome | 14           | 33419384  | 33419423  | 1  | CAGATTATGTGATCCTGATTATAAATCTGAACATGAATC             | Mus musculus           |
| 1351013 | reflig     | reftig_56    | 467486    | 467525    | 1  | GTCAATTAAGAGTAAAATCGATAAAAATAAATAAATGAA             | Ciona savignyi         |
| 1351013 | chromosome | 28           | 31705315  | 31705354  | 1  | TTTAATTAAGAGAAAACATGCTGATTAAATGAACATGCA             | Canis familiaris       |
| 1351013 | chromosome | 10           | 120066808 | 120066847 | 1  | TTTAATTAAGAGAAAACATGCTGATTAAATGAACATGCA             | Homo sapiens           |
| 1351013 | scaffold   | scaffold_53  | 1197305   | 1197344   | 1  | TTTAATTAAGAGAAAACATGCTAATTAATAAACAGCA               | Takifugu rubripes      |
| 1351013 | chromosome | 10q          | 4015519   | 4015558   | 1  | GTCAATTAAGAGAAAACATGCTAATTAATAAACAGCA               | Ciona intestinalis     |
| 1351013 | group      | groupVI      | 2766663   | 2766702   | 1  | TTTAATTAAGAGAAAACATGCTAATTAATAAACAGCA               | Gasterosteus aculeatus |
| 1351013 | chromosome | 15           | 29604904  | 29604943  | -1 | TTTAATTAAGAGAAAACATGCTAATTAATAAACAGCA               | Oryzias latipes        |
| 1351013 | toplevel   | 13           | 12344688  | 12344727  | 1  | TTTAATTAAGAGAAAACATGCTAATTAATAAACAGCA               | Danio rerio            |
| 1351013 | chromosome | 19           | 60281652  | 60281691  | 1  | TTTAATTAAGAGAAAACATGCTGATTAAATGAACATGCA             | Mus musculus           |
| 1352510 | reflig     | reftig_431   | 479444    | 479481    | 1  | AAGCACCTTCCATCTGCTATAAATAAAGATCGAT                  | Ciona savignyi         |
| 1352510 | chromosome | 28           | 16355617  | 16355656  | 1  | CTACAGGAATTCCTCAATTCCTATAAAAATGAAATTCAT             | Canis familiaris       |
| 1352510 | chromosome | 10           | 102404273 | 102404312 | 1  | CTACAGGAATTCCTCAATTCCTATAAAAATGAAATTCAT             | Homo sapiens           |
| 1352510 | scaffold   | scaffold_59  | 812901    | 812940    | 1  | CTCCAGGAATTCCTCAATTCCTATAAAAATGAAATTCAT             | Takifugu rubripes      |
| 1352510 | chromosome | 2q           | 3365830   | 3365870   | -1 | CTACACCGTTCCTCAATTCCTATAAAAATGAAATTCAT              | Ciona intestinalis     |
| 1352510 | chromosome | 19           | 10196963  | 10197002  | -1 | CTACTGGAATTCCTCAATTCCTATAAAAATGAAATTCAT             | Oryzias latipes        |
| 1352510 | group      | groupV       | 960156    | 960195    | -1 | CTACGGGAATTCCTCAATTCCTATAAAAATGAAATTCAT             | Gasterosteus aculeatus |
| 1352510 | toplevel   | 13           | 29145877  | 29145916  | 1  | CTACAGGAATTCCTCAATTCCTATAAAAATGAAATTCAT             | Danio rerio            |
| 1352510 | chromosome | 19           | 44744757  | 44744796  | 1  | CTACAGGAATTCCTCAATTCCTATAAAAATGAAATTCAT             | Mus musculus           |
| 1352154 | reflig     | reftig_22    | 617313    | 617359    | -1 | TATTGTGCATGGTAACCTATATGCTTGTCTAAATTAATGAATCAG       | Ciona savignyi         |
| 1352154 | chromosome | 12           | 13260108  | 13260155  | -1 | TCATTTGATGCTGAGATTATGCTCAATTAATAAATGAAATTCAG        | Canis familiaris       |
| 1352154 | chromosome | 6            | 41638053  | 41638100  | -1 | TCATTTGATGCTGAGATTATGCTCAATTAATAAATGAAATTCAG        | Homo sapiens           |
| 1352154 | scaffold   | scaffold_79  | 142414    | 142461    | 1  | TCATTTGATGCTTTAGATTATATGCTCAAAAAGTAATTTCCGAG        | Takifugu rubripes      |
| 1352154 | chromosome | 2q           | 2703850   | 2703897   | 1  | ACATGTCATGCTGAGATTATATGCTTTCGAAAAGTAATTTCCGAG       | Ciona intestinalis     |
| 1352154 | chromosome | 5            | 28991790  | 28991837  | -1 | TCATTTGATGCTTTAGATTATATGCTCAAAAAGTAATTTCCGAG        | Oryzias latipes        |
| 1352154 | scaffold   | scaffold_27  | 474549    | 474596    | 1  | TCATTTGATGCTTTAGATTATATGCTCAAAAAGTAATTTCCGAG        | Gasterosteus aculeatus |
| 1352154 | toplevel   | 11           | 19748801  | 19748848  | 1  | TCATTTGATGCTTTAGATTATATGCTCAAAAAGTAATTTCCGAG        | Danio rerio            |
| 1352154 | chromosome | 17           | 48044901  | 48044948  | 1  | TCATTTGATGCTGAGATTATGCTCAATTAATAAATGAAATTCAG        | Mus musculus           |
| 1351879 | reflig     | reftig_1     | 1815125   | 1815175   | 1  | ACACCAGCCGCTGACGCTCATCAGATCACTGATGGTTATCGAATCGGACT  | Ciona savignyi         |
| 1351879 | chromosome | 8            | 35281214  | 35281265  | 1  | ATAACAGTGCAGCTCTCACTCAATTCAGATCTGCTAATGGAATCTGTCT   | Canis familiaris       |
| 1351879 | chromosome | 14           | 56127212  | 56127263  | 1  | ATAACAGTGCAGCTCTCACTCAATTCAGATCTGCTAATGGAATCTGTCT   | Homo sapiens           |
| 1351879 | scaffold   | scaffold_193 | 59397     | 59448     | 1  | ATAACAGGCTGCTCTCACTCAATTCAGATCTGCTAATGGAATCTGTCT    | Takifugu rubripes      |
| 1351879 | chromosome | 3q           | 5201233   | 5201283   | -1 | ACACCAGCCCTCTCACTCAATTCAGATCTGCTAATGGAATCTGTCT      | Ciona intestinalis     |
| 1351879 | group      | groupXV      | 5078243   | 5078294   | -1 | ATAACGGGCTGCTCTCACTCAATTCAGATCTGCTAATGGAATCTGTCT    | Gasterosteus aculeatus |
| 1351879 | chromosome | 22           | 12452936  | 12452987  | 1  | ATAACAGGCTGCTCTCACTCAATTCAGATCTGCTAATGGAATCTGTCT    | Oryzias latipes        |
| 1351879 | toplevel   | 17           | 42581599  | 42581642  | -1 | CCTGCTCTCACTCAATTCAGATCTGCTAATGGAATCTGTCT           | Danio rerio            |
| 1351879 | chromosome | 14           | 49076465  | 49076516  | 1  | ATAACGGGCTGCTCTCACTCAATTCAGATCTGCTAATGGAATCTGTCT    | Mus musculus           |
| 1350874 | reflig     | reftig_24    | 416465    | 416509    | 1  | TAATTAATGACGGGCTGGCTCAGTCCAGTATATCGACTTGT           | Ciona savignyi         |
| 1350874 | chromosome | 36           | 20514719  | 20514762  | 1  | TAATTAATGACGGGCTGGCTCAGTCCAGTATATCGACTTGT           | Canis familiaris       |
| 1350874 | chromosome | 2            | 173823386 | 173823429 | 1  | TAATTAATGACGGGCTGGCTCAGTCCAGTATATCGACTTGT           | Homo sapiens           |
| 1350874 | scaffold   | scaffold_100 | 599043    | 599087    | -1 | TAATTAATGACGGGCTGGCTCAGTCCAGTATATCGACTTGT           | Takifugu rubripes      |
| 1350874 | chromosome | 8q           | 4503805   | 4503849   | 1  | TAATTAATGACGGGCTGGCTCAGTCCAGTATATCGACTTGT           | Ciona intestinalis     |
| 1350874 | group      | groupXVI     | 10088944  | 10088988  | -1 | TAATTAATGACGGGCTGGCTCAGTCCAGTATATCGACTTGT           | Gasterosteus aculeatus |
| 1350874 | chromosome | 21           | 24218397  | 24218441  | 1  | TAATTAATGACGGGCTGGCTCAGTCCAGTATATCGACTTGT           | Oryzias latipes        |
| 1350874 | toplevel   | 9            | 3495298   | 3495342   | 1  | TAATTAATGACGGGCTGGCTCAGTCCAGTATATCGACTTGT           | Danio rerio            |
| 1350874 | chromosome | 2            | 72264959  | 72265002  | 1  | TAATTAATGACGGGCTGGCTCAGTCCAGTATATCGACTTGT           | Mus musculus           |
| 1350782 | reflig     | reftig_24    | 412420    | 412470    | -1 | ACTCTGTAATTTGTAATTTATGCTGTTCTCGTGTGTTGAGTGGGCC      | Ciona savignyi         |
| 1350782 | chromosome | 28           | 31748949  | 31749000  | 1  | GCCTCGTAAATTTGTTTTATCATCTCCAAGTGTGTTGCACAGGCAGCA    | Canis familiaris       |
| 1350782 | chromosome | 10           | 120107882 | 120107933 | 1  | GCCTCGTAAATTTGTTTTATCATCTCCAAGTGTGTTGCACAGGCAGCA    | Homo sapiens           |
| 1350782 | scaffold   | scaffold_53  | 1206955   | 1207006   | 1  | GCCTCGTAAATTTGTTTTATCATCTCCAAGTGTGTTGCACAGGCAGCA    | Takifugu rubripes      |
| 1350782 | chromosome | 8q           | 4499440   | 4499490   | -1 | ACCTTGTAATTTGTAATTTATGCTGTTCTGTTGTTGTCAGGCGCTT      | Ciona intestinalis     |
| 1350782 | group      | groupVI      | 2777375   | 2777426   | 1  | GCCTTGTAATTTGTTTTATCATCTCCAAGTGTGTTGCACAGGCAGTC     | Gasterosteus aculeatus |
| 1350782 | chromosome | 15           | 29591300  | 29591351  | -1 | GCCTTGTAATTTGTTTTATCATCTCCAAGTGTGTTGCACAGGCAGTC     | Oryzias latipes        |
| 1350782 | toplevel   | 13           | 12377734  | 12377784  | 1  | GCCTTGTAATTTGTTTTATCATCTCCAAGTGTGTTGCACAGGCAGTC     | Danio rerio            |
| 1350782 | chromosome | 19           | 60318646  | 60318697  | 1  | GCCTCGTAAATTTGTTTTATCATCTCCAAGTGTGTTGCACAGGCAGCA    | Mus musculus           |
| 1350084 | reflig     | reftig_13    | 1886316   | 1886370   | -1 | ATTATTTATGCAATCTTAATTAATGATCGGACGTTTATTACATTTTTAAA  | Ciona savignyi         |
| 1350084 | chromosome | 22           | 28924540  | 28924591  | 1  | AAGATTTATGGATTCTCATTGCATATTGCATACAATTCATCAATTACTCAA | Canis familiaris       |
| 1350084 | chromosome | 13           | 71199332  | 71199383  | 1  | AAGATTTATGGATTCTCATTGCATATTGCATACAATTCATCAATTACTCAA | Homo sapiens           |
| 1350084 | scaffold   | scaffold_31  | 409072    | 409123    | -1 | AAGATTTATGGATTCTCATTGCATATTGCATACAATTCATCAATTACTCAA | Takifugu rubripes      |
| 1350084 | scaffold   | scaffold_78  | 503984    | 504034    | 1  | ATAATTTATGGATTCTCATTGCATATTGCATACAATTCATCAATTACTCAA | Ciona intestinalis     |
| 1350084 | chromosome | 21           | 9488057   | 9488108   | 1  | AAGATTTATGGATTCTCATTGCATATTGCATACAATTCATCAATTACTCAA | Oryzias latipes        |
| 1350084 | group      | groupXVI     | 2722449   | 2722500   | -1 | AAGATTTATGGATTCTCATTGCATATTGCATACAATTCATCAATTACTCAA | Gasterosteus aculeatus |
| 1350084 | toplevel   | 9            | 24892346  | 24892397  | -1 | AAGATTTATGGATTCTCATTGCATATTGCATACAATTCATCAATTACTCAA | Danio rerio            |
| 1350084 | chromosome | 14           | 98446327  | 98446378  | 1  | AAGATTTATGGATTCTCATTGCATATTGCATACAATTCATCAATTACTCAA | Mus musculus           |
| 1352046 | reflig     | reftig_27    | 282125    | 282168    | -1 | AGTTTTTGTGTAATTTATAGATCTTTAGAGGCTCAATATCAATA        | Ciona savignyi         |
| 1352046 | chromosome | 35           | 12841896  | 12841934  | 1  | GGCAGCATAAATTTACAGCTGAAGACTCATATCATTAA              | Canis familiaris       |
| 1352046 | chromosome | 6            | 10138584  | 10138622  | 1  | GGCAGCATAAATTTACAGCTGAAGACTCATATCATTAA              | Homo sapiens           |
| 1352046 | scaffold   | scaffold_162 | 397443    | 397481    | -1 | GGCAGCATAAATTTACAGCTGAAGACTCATATCATTAA              | Takifugu rubripes      |
| 1352046 | chromosome | 1q           | 7248540   | 7248580   | -1 | GGCCGTGTGTTATTTATGATCTCAAACTGATATCAATA              | Ciona intestinalis     |
| 1352046 | group      | groupXXI     | 4172522   | 4172560   | 1  | GGCAGCATAAATTTACAGCTGAAGACTCATATCATTAA              | Gasterosteus aculeatus |
| 1352046 | chromosome | 20           | 10931248  | 10931286  | 1  | GGCAGTAAATTTACAGCTGAAGACTCATATCATTAA                | Oryzias latipes        |
| 1352046 | toplevel   | 21           | 45708466  | 45708504  | -1 | GGCAGCATAAATTTACAGCTGAAGACTCATATCATTAA              | Danio rerio            |

|         |            |              |           |           |    |                                                               |                        |
|---------|------------|--------------|-----------|-----------|----|---------------------------------------------------------------|------------------------|
| 1352046 | chromosome | 13           | 40477554  | 40477592  | 1  | GGCAGCGCAATTTATTACAGCTGAAGACTCATATCATT                        | Mus musculus           |
| 1352662 | reflitg    | reflitg_244  | 114282    | 114331    | -1 | AGTCGATTGCTCAGATTCAATCTAATTTTCAGCACACAAATAAAAAATCC            | Ciona savignyi         |
| 1352662 | chromosome | 9            | 60501061  | 60501108  | 1  | AGATGATCCCAATGAACCTCAATTTAATTTGGTGCAAAATAAAAAATCC             | Canis familiaris       |
| 1352662 | chromosome | 9            | 127817298 | 127817345 | -1 | AGATGATCCCAATGAACCTCAATATAATTTGGTGCAAAATAAAAAATCC             | Homo sapiens           |
| 1352662 | scaffold   | scaffold_18  | 813902    | 813949    | -1 | AGATGATCCCAATGAACCTCAATTTAATTTGGTGCAAAATAAAAAATCC             | Takifugu rubripes      |
| 1352662 | chromosome | 14p          | 192194    | 192243    | -1 | AGTCGATCGTCTGGATTAATAATTTAATTTGGTGCAAAATAAAAAATCC             | Ciona intestinalis     |
| 1352662 | group      | groupXIII    | 13621103  | 13621150  | -1 | AGATGATCCCAATGAACCTCAATTTAATTTGGTGCAAAATAAAAAATCC             | Gasterosteus aculeatus |
| 1352662 | chromosome | 9            | 19052427  | 19052474  | -1 | AGATGATCCCAATGAACCTCAATTTAATTTGGTGCAAAATAAAAAATCC             | Oryzias latipes        |
| 1352662 | toplevel   | 16           | 32765265  | 32765312  | -1 | AGATGATCCCAATGAACCTCAATTTAATTTGGTGCAAAATAAAAAATCC             | Danio rerio            |
| 1352662 | chromosome | 2            | 33992184  | 33992231  | 1  | AGATGAAACCCATGAACCTCAATTTAATTTGGTGCAAAATAAAAAATCC             | Mus musculus           |
| 1352077 | reflitg    | reflitg_1    | 2388713   | 2388755   | -1 | AGAAAGGAGAAACAACTTCGAGTGGGAGGAGTGGGAGAGACGC                   | Ciona savignyi         |
| 1352077 | chromosome | 16           | 48528533  | 48528575  | 1  | AGAAAGGAGAAACAACTTCGAGTGGGAGGAGTGGGAGAGACGC                   | Canis familiaris       |
| 1352077 | chromosome | 4            | 186175741 | 186175783 | -1 | AGAAAGGAGAAACAACTTCGAGTGGGAGGAGTGGGAGAGACGC                   | Homo sapiens           |
| 1352077 | scaffold   | scaffold_364 | 50783     | 50825     | -1 | AGAAAGGAGAAACAACTTCGAGTGGGAGGAGTGGGAGAGACGC                   | Takifugu rubripes      |
| 1352077 | chromosome | 3p           | 1214837   | 1214879   | -1 | AGAAAGGAGAAACAACTTCGAGTGGGAGGAGTGGGAGAGACGC                   | Ciona intestinalis     |
| 1352077 | scaffold   | scaffold461  | 267910    | 267952    | 1  | AGAAAGGAGAAACAACTTCGAGTGGGAGGAGTGGGAGAGACGC                   | Oryzias latipes        |
| 1352077 | group      | groupIX      | 8598715   | 8598756   | -1 | AGAAAGGAGAAACAACTTCGAGTGGGAGGAGTGGGAGAGACGC                   | Gasterosteus aculeatus |
| 1352077 | toplevel   | 1            | 13423951  | 13423993  | -1 | AGAAAGGAGAAACAACTTCGAGTGGGAGGAGTGGGAGAGACGC                   | Danio rerio            |
| 1352077 | chromosome | 8            | 47380731  | 47380773  | 1  | AGAAAGGAGAAACAACTTCGAGTGGGAGGAGTGGGAGAGACGC                   | Mus musculus           |
| 1351049 | reflitg    | reflitg_251  | 130263    | 130303    | 1  | TTACCGTAAAAGCTTTTGTGGGCCCTGCCACCTGCTTTA                       | Ciona savignyi         |
| 1351049 | chromosome | 22           | 52785194  | 52785232  | 1  | TTACAGTACAAAGCTTATAGGGTCTTGAAACCCCTTTG                        | Canis familiaris       |
| 1351049 | chromosome | 13           | 99312241  | 99312279  | 1  | TTACAGTACAAAGCTTATAGGGTCTTGAAACCCCTTTG                        | Homo sapiens           |
| 1351049 | scaffold   | scaffold_31  | 524330    | 524368    | 1  | TTACAGTACAAAGCTTATAGGGTCTTGAAACCCCTTTG                        | Takifugu rubripes      |
| 1351049 | chromosome | 2q           | 4288265   | 4288305   | 1  | TTACTGTAAAAGCTTTTGTGGTCTGCTGACCTGCTCTG                        | Ciona intestinalis     |
| 1351049 | chromosome | 21           | 9274564   | 9274602   | -1 | TTACAGTACAAAGCTTATAGGGTCTTGAAACCCCTTTG                        | Oryzias latipes        |
| 1351049 | group      | groupXVI     | 2845247   | 2845285   | 1  | TTACAGTACAAAGCTTATAGGGTCTTGAAACCCCTTTG                        | Gasterosteus aculeatus |
| 1351049 | toplevel   | 9            | 25186246  | 25186284  | 1  | TTACAGTACAAAGCTTATAGGGTCTTGAAACCCCTTTG                        | Danio rerio            |
| 1351049 | chromosome | 14           | 122774046 | 122774084 | 1  | TTACAGTACAAAGCTTATAGGGTCTTGAAACCCCTTTG                        | Mus musculus           |
| 1352909 | reflitg    | reflitg_48   | 2432186   | 2432228   | 1  | ATTTAATAGCTTTTGATAATTAATCCCGGCTTAATATTA                       | Ciona savignyi         |
| 1352909 | chromosome | 14           | 56795943  | 56795990  | 1  | ACTATATCGCATGCATAATAAACTGCTCATTGCTCATAATATTA                  | Canis familiaris       |
| 1352909 | chromosome | 7            | 114088217 | 114088264 | 1  | ACTATATCGCATGCATAATAAACTGCTCATTGCTCATAATATTA                  | Homo sapiens           |
| 1352909 | scaffold   | scaffold_8   | 3086029   | 3086076   | -1 | ACTATATAGCATGCATAATAAACTGCTCATTGCTCATAATATTA                  | Takifugu rubripes      |
| 1352909 | chromosome | 5q           | 5026217   | 5026266   | -1 | ATTTAATAGCTTTTGATAATTAATCCCGGCTTAATATTA                       | Ciona intestinalis     |
| 1352909 | group      | groupIV      | 19051021  | 19051068  | -1 | ACTATATAGCATGCATAATAAACTGCTCATTGCTCATAATATTA                  | Gasterosteus aculeatus |
| 1352909 | chromosome | 23           | 4508797   | 4508844   | -1 | ACTATATAGCATGCATAATAAACTGCTCATTGCTCATAATATTA                  | Oryzias latipes        |
| 1352909 | toplevel   | 4            | 40363384  | 40363431  | 1  | ACTATATAGCATGCATAATAAACTGCTCATTGCTCATAATATTA                  | Danio rerio            |
| 1352909 | chromosome | 6            | 15362629  | 15362676  | 1  | ACTATATCGCATGCATAATAAACTGCTCATTGCTCATAATATTA                  | Mus musculus           |
| 1352705 | reflitg    | reflitg_1    | 2394837   | 2394875   | -1 | CATTTAAAATAAAACCTCTGTTTTCCCTCGGTTAAT                          | Ciona savignyi         |
| 1352705 | chromosome | 28           | 4314295   | 4314334   | -1 | GCATTTAATAACCAAAATATCATTATATCCCTTTAAT                         | Canis familiaris       |
| 1352705 | chromosome | 10           | 50274929  | 50274968  | -1 | GCATTTAATAACCAAAATATCATTATATCCCTTTAAT                         | Homo sapiens           |
| 1352705 | scaffold   | scaffold_24  | 782162    | 782201    | -1 | GCATTTAATAACCAAAATATCATTATATCCCTTTAAT                         | Takifugu rubripes      |
| 1352705 | chromosome | 3p           | 1221633   | 1221672   | -1 | GCATTTAATAACCAAAATATCATTATATCCCTTTAAT                         | Ciona intestinalis     |
| 1352705 | group      | groupVI      | 8143314   | 8143353   | 1  | GCATTTAATAACCAAAATATCATTATATCCCTTTAAT                         | Gasterosteus aculeatus |
| 1352705 | chromosome | 15           | 23044672  | 23044711  | -1 | GCATTTAATAACCAAAATATCATTATATCCCTTTAAT                         | Oryzias latipes        |
| 1352705 | toplevel   | 13           | 30381150  | 30381189  | 1  | GCATTTAATAACCAAAATATCATTATATCCCTTTAAT                         | Danio rerio            |
| 1352705 | chromosome | 14           | 33411732  | 33411771  | 1  | GCATTTAATAACCAAAATATCATTATATCCCTTTAAT                         | Mus musculus           |
| 1349653 | reflitg    | reflitg_375  | 84487     | 84429     | -1 | GGCGGGAATATTGATAAAACAACAGCTGCAACGGTAGCAGT                     | Ciona savignyi         |
| 1349653 | chromosome | 9            | 60661939  | 60661981  | 1  | GGCAGGGAATATTGATAAAACAATATCTGTAGCCGTTTCATT                    | Canis familiaris       |
| 1349653 | chromosome | 9            | 127647618 | 127647660 | -1 | GGCAGGGAATATTGATAAAACAATATCTGTAGCCGTTTCATT                    | Homo sapiens           |
| 1349653 | scaffold   | scaffold_18  | 743877    | 743919    | -1 | GGCGGGAATATTGATAAAACAATATCTGTAGCCGTTTCATT                     | Takifugu rubripes      |
| 1349653 | chromosome | 4q           | 1830466   | 1830508   | 1  | GGTGGAAATATTCTTAAACAACAAGCGGCTGCGCGGCATT                      | Ciona intestinalis     |
| 1349653 | group      | groupXIII    | 13554482  | 13554524  | -1 | GGCAGAGAATATTGATAAAACAATATCTGTAGCCGTTTCATT                    | Gasterosteus aculeatus |
| 1349653 | chromosome | 9            | 18958029  | 18958071  | -1 | GCCAGGGAATATTGATAAAACAATATCTGTAGCCGTTTCATT                    | Oryzias latipes        |
| 1349653 | toplevel   | 8            | 32421347  | 32421387  | -1 | CGGGAATATTGATAAAACAATATCTGTAGCCGTTTCATT                       | Danio rerio            |
| 1349653 | chromosome | 2            | 34142518  | 34142560  | 1  | GGCAGGGAATATTGATAAAACAATATCTGTAGCCGTTTCATT                    | Mus musculus           |
| 1351072 | reflitg    | reflitg_19   | 4761683   | 4761745   | -1 | ATCCGAGTAAATGTTTATAAAAATTCAGAGCTCATTTCAAGTTCATGAACAGTTAATAAAA | Ciona savignyi         |
| 1351072 | chromosome | 36           | 5787696   | 5787759   | 1  | ATCCATCTGAGCTTTGATAAATCTATTACAGTTTCATTTCACTGATTTCAACGTAATAAAA | Canis familiaris       |
| 1351072 | chromosome | 2            | 157155105 | 157155168 | 1  | ATCCATCTGAGCTTTGATAAATCTATTACAGTTTCATTTCACTGATTTCAACGTAATAAAA | Homo sapiens           |
| 1351072 | scaffold   | scaffold_46  | 536036    | 536099    | -1 | ATCCATCTGAGCTTTGATAAATCTATTACAGTTTCATTTCACTGATTTCAACGTAATAAAA | Takifugu rubripes      |
| 1351072 | chromosome | 2q           | 2586250   | 2586312   | -1 | ATCCGAGTAAATGTTTATAAAAATTCAGAGCTCATTTCAAGTTCATGAACAGTTAATAAAA | Ciona intestinalis     |
| 1351072 | group      | groupXVI     | 11261391  | 11261454  | -1 | ATCCATCTGAGCTTTGATAAATCTATTACAGTTTCATTTCACTGATTTCAACGTAATAAAA | Gasterosteus aculeatus |
| 1351072 | chromosome | 21           | 22606350  | 22606413  | 1  | ATCCATCTGAGCTTTGATAAATCTATTACAGTTTCATTTCACTGATTTCAACGTAATAAAA | Oryzias latipes        |
| 1351072 | toplevel   | Zv7_NA227    | 39433     | 39496     | -1 | ATCCATCGAGCTTTGATAAATCTATTACAGTTTCATTTCACTGATTTCAACGTAATAAAA  | Danio rerio            |
| 1351072 | chromosome | 2            | 57227856  | 57227919  | 1  | ATCCATCTGAGCTTTGATAAATCTATTACAGTTTCATTTCACTGATTTCAACGTAATAAAA | Mus musculus           |
| 1353795 | reflitg    | reflitg_1    | 1225860   | 1225905   | 1  | AACACGATAAATGAATAAACTATTATGACGGCTGAATGGGTATGTG                | Ciona savignyi         |
| 1353795 | chromosome | 28           | 41543174  | 41543215  | 1  | ATCAAGCTAATAACAGTTATTATGGCATTTTTGAAGATGATG                    | Canis familiaris       |
| 1353795 | chromosome | 10           | 131584267 | 131584308 | 1  | ATCAAGCTAATAACAGTTATTATGGCATTTTTGAAGATGATG                    | Homo sapiens           |
| 1353795 | scaffold   | scaffold_76  | 482380    | 482421    | 1  | ATCAAGCTAATAACAGTTATTATGGCATTTTTGAAGATGATG                    | Takifugu rubripes      |
| 1353795 | chromosome | 3p           | 1993482   | 1993524   | -1 | AACAAGATAATGAATAAACTATTATGACGTTTGAAGGTTTGG                    | Ciona intestinalis     |
| 1353795 | group      | groupVI      | 11277870  | 11277911  | -1 | ATCAAGCTAATAACAGTTATTATGGCATTTTTGAAGATGATG                    | Gasterosteus aculeatus |
| 1353795 | chromosome | 15           | 18875869  | 18875910  | 1  | ATCAAGCTAATAACAGTTATTATGGCATTTTTGAAGATGATG                    | Oryzias latipes        |
| 1353795 | toplevel   | 12           | 39082204  | 39082245  | 1  | ATCAAGCTAATAACAGTTATTATGGCATTTTTGAAGATGATG                    | Danio rerio            |
| 1353795 | chromosome | 7            | 144444767 | 144444808 | 1  | ATCAAGCTAATAACAGTTATTATGGCATTTTTGAAGATGATG                    | Mus musculus           |
| 1352288 | reflitg    | reflitg_19   | 4533387   | 4533426   | 1  | TGCGGATTTACTTGGTTAAAAATAATCAAAACAAAGTTT                       | Ciona savignyi         |
| 1352288 | chromosome | 11           | 39563489  | 39563526  | 1  | CAGACTATGTGTTGTAATAATACATTAATAAAAGCATTT                       | Canis familiaris       |
| 1352288 | chromosome | 9            | 16428417  | 16428454  | 1  | CAGACTATGTGTTGTAATAATACATTAATAAAAGCATTT                       | Homo sapiens           |
| 1352288 | scaffold   | scaffold_17  | 655292    | 655329    | 1  | TGGGGTATTTGTTGTAATAATACATTAATAAAAGCATTT                       | Takifugu rubripes      |
| 1352288 | chromosome | 2q           | 5696695   | 5696734   | 1  | TGCGGATTTGCGGTGTTAAAAATAATCAAAACAAAGTTT                       | Ciona intestinalis     |
| 1352288 | group      | groupIX      | 7785368   | 7785405   | -1 | TGGGGTATTTGTTGTAATAATACATTAATAAAAGCATTT                       | Gasterosteus aculeatus |
| 1352288 | chromosome | 1            | 21193316  | 21193354  | -1 | TGGGGTATTTGTTGTAATAATACATTAATAAAAGCATTT                       | Oryzias latipes        |
| 1352288 | toplevel   | 1            | 24543954  | 24543990  | 1  | TGGGGTATTTGTTGTAATAATACATTAATAAAAGCATTT                       | Danio rerio            |
| 1352288 | chromosome | 4            | 83940443  | 83940480  | 1  | CAGACTATGTGTTGTAATAATACATTAATAAAAGCATTT                       | Mus musculus           |
| 1351990 | reflitg    | reflitg_30   | 3415283   | 3415323   | 1  | TCATCTGAGGTTTCAGATAGCGGCTGCGCTGCCAATCCG                       | Ciona savignyi         |
| 1351990 | chromosome | 23           | 54616564  | 54616606  | 1  | CTCTCTGAAGTTCTCTAAATAGATTTAAATGCCAATTAG                       | Canis familiaris       |
| 1351990 | chromosome | 3            | 159365462 | 159365504 | 1  | CTCTCTGAAGTTCTCTAAATAGATTTAAATGCCAATTAG                       | Homo sapiens           |
| 1351990 | scaffold   | scaffold_9   | 1521985   | 1522027   | 1  | CGCTCTGAAGTTTCAGATAGCGGCTGCGCTGCCAATTAG                       | Takifugu rubripes      |
| 1351990 | scaffold   | scaffold_55  | 503518    | 503558    | 1  | CGCTCTGAAGTTTCAGATAGCGGCTGCGCTGCCAATTAG                       | Ciona intestinalis     |
| 1351990 | group      | groupI       | 8784231   | 8784273   | -1 | GCCTCTGAAGTTCTCTAAATGGGTTTTAAATGCCAATTAG                      | Gasterosteus aculeatus |
| 1351990 | chromosome | 13           | 14785256  | 14785298  | 1  | GCCTCTGAAGTTCTCTAAATGGGTTTTAAATGCCAATTAG                      | Oryzias latipes        |
| 1351990 | toplevel   | 15           | 1612515   | 1612554   | 1  | TCTTGAAGTTCTCTAAATGGGTTTTAAATGCCAATTAG                        | Danio rerio            |

|         |             |                |           |           |    |                                                 |                        |
|---------|-------------|----------------|-----------|-----------|----|-------------------------------------------------|------------------------|
| 1351990 | chromosome  | 3              | 66840376  | 66840418  | 1  | CCTCTTGAAGTTCTCCAATAGATTTTAAATGCCAATTAG         | Mus musculus           |
| 1353210 | reflig      | reflig_86      | 182174    | 182216    | 1  | CTGTTTTGGTTATAATGACGTGCGGGTAAAGTCTGCTCA         | Ciona savignyi         |
| 1353210 | chromosome  | 28             | 41540848  | 41540884  | 1  | CAATTTTTGTTTCATAAGTAATTTGATTAAACATGTTGA         | Canis familiaris       |
| 1353210 | chromosome  | 10             | 131581753 | 131581789 | 1  | CAATTTTTGTTTCATAAGTAATTTGATTAAACATGTTGA         | Homo sapiens           |
| 1353210 | scaffold    | scaffold_97    | 430438    | 430474    | -1 | CAATTTTTGGTTCATAAGTAATTTGATTAAAGTGGTGA          | Takifugu rubripes      |
| 1353210 | chromosome  | 8q             | 1976774   | 1976813   | 1  | CTGTTTTGGTTATAATGACGTCTAGGCTAAAGTCTGG           | Ciona intestinalis     |
| 1353210 | group       | groupIV        | 14121869  | 14121905  | 1  | CAATTTTTGGTTCATAAGTAATTTGATTAAAGTGGTGA          | Gasterosteus aculeatus |
| 1353210 | chromosome  | 10             | 16881772  | 16881808  | 1  | CAATTTTTGGTTCATAAGTAATTTGATTAAAGTGGTGA          | Oryzias latipes        |
| 1353210 | toplevel    | 14             | 39203302  | 39203338  | 1  | CAATTCGGTTCATAAGTAATTTGATTAAACGAGATGA           | Danio rerio            |
| 1353210 | chromosome  | 7              | 144442414 | 144442450 | 1  | CAATTTTTGTTTCATAAGTAATTTGATTAAACATGTTGA         | Mus musculus           |
| 1352107 | reflig      | reflig_172     | 254999    | 255039    | -1 | AAATTAAGGAATGATAATTTGTTTTGCTGCTAATCCGAC         | Ciona savignyi         |
| 1352107 | chromosome  | X              | 20484108  | 20484149  | -1 | AATTGCAGAGAATGAATAATTTGATTGACAATTTGACCAGTG      | Canis familiaris       |
| 1352107 | chromosome  | X              | 24918514  | 24918555  | -1 | AATTGCAGAGAATGAATAATTTGATTGACAATTTGACCAGTG      | Homo sapiens           |
| 1352107 | scaffold    | scaffold_152   | 402545    | 402586    | 1  | AATTGCAGAGAATGAATAATTTGATTGACAATTTGACCAGTG      | Takifugu rubripes      |
| 1352107 | chromosome  | 8q             | 3267588   | 3267628   | 1  | AAATTAACGGAAATGATAATTTGGCTTGTCTACTAATCCCGG      | Ciona intestinalis     |
| 1352107 | group       | groupXXI       | 5928951   | 5928992   | 1  | AATTGCAGAGAATGAATAATTTGATTGACAATTTGACCAGTG      | Gasterosteus aculeatus |
| 1352107 | chromosome  | 20             | 13321977  | 13322018  | 1  | AATTGCAGAGAATGAATAATTTGATTGACAATTTGACCAGTG      | Oryzias latipes        |
| 1352107 | toplevel    | 24             | 22507273  | 22507314  | -1 | AATTGCAGAGAATGAATAATTTGATTGACAATTTGACCAGTG      | Danio rerio            |
| 1352107 | chromosome  | X              | 90556032  | 90556073  | 1  | AATTGCAGAGAATGAATAATTTGATTGACAATTTGACCAGTG      | Mus musculus           |
| 1350763 | reflig      | reflig_19      | 4767777   | 4767814   | -1 | AAGTCGCGTGAATTAATTTATTCATCTTTATAAAGCAAT         | Ciona savignyi         |
| 1350763 | chromosome  | 1              | 123482508 | 123482551 | 1  | ACTTACTTAATGAAATACATAATTAACATATTATAATGTCAGTA    | Canis familiaris       |
| 1350763 | chromosome  | 19             | 36332718  | 36332761  | -1 | ACTTACTTAATGAAATACATAATTAACATATTATAATGTCAGTA    | Homo sapiens           |
| 1350763 | scaffold    | scaffold_133   | 415485    | 415528    | -1 | ACTTCTTAATGAAATAAGTAATTAACATATTATAATGTCGCG      | Takifugu rubripes      |
| 1350763 | chromosome  | 2q             | 2591824   | 2591868   | 1  | ACTTCTTTATAAAAAATGAATAATTAATCCACACCCTTGTCATGG   | Ciona intestinalis     |
| 1350763 | group       | groupXX        | 4606132   | 4606175   | -1 | ACTTCTTAATGAAATAAGTAATTAACATATTATAATGTCGCG      | Gasterosteus aculeatus |
| 1350763 | ultracontig | ultracontig182 | 2432250   | 2432293   | -1 | ACTTCTTAATGAAATAAGTAATTAACATATTATAATGTCGCG      | Oryzias latipes        |
| 1350763 | toplevel    | 19             | 12361043  | 12361079  | 1  | CCTTAATGAAATACGTAATTAACATATTATAATGTCG           | Danio rerio            |
| 1350763 | chromosome  | 7              | 37677879  | 37677922  | 1  | ACTTACTTAATGAAATACATAATTAACATATTATAATGTCAGTA    | Mus musculus           |
| 1351973 | reflig      | reflig_30      | 1337653   | 1337692   | 1  | AATCTTAATGTCGAGCTGCTGATTTCAATTTGCTATATTG        | Ciona savignyi         |
| 1351973 | chromosome  | 6              | 18544466  | 18544508  | -1 | CATCTTAATAGTGATGTCACGAAATTAATGATGTTGTTAATG      | Canis familiaris       |
| 1351973 | chromosome  | 7              | 1410363   | 1410405   | 1  | CATCTTAATAGTGATGTCACGAAATTAATGATGTTGTTAATG      | Homo sapiens           |
| 1351973 | scaffold    | scaffold_40    | 1466607   | 1466649   | -1 | CAACTTAATCTGATGTCATGAATTAATGATGTTGTTAATG        | Takifugu rubripes      |
| 1351973 | chromosome  | 1q             | 7092238   | 7092279   | -1 | AATCTTAATGTCGAGCTGCTGATTTCAATTTGCTTTTTAATG      | Ciona intestinalis     |
| 1351973 | group       | groupIX        | 18138487  | 18138529  | -1 | CAACTTAATCTGATGTCATGAATTAATGATGTTGTTAATG        | Gasterosteus aculeatus |
| 1351973 | chromosome  | 1              | 27760919  | 27760961  | -1 | CAACTTAATCTGATGTCATGAATTAATGATGTTGTTAATG        | Oryzias latipes        |
| 1351973 | toplevel    | 1              | 3666546   | 3666588   | -1 | CATCTTAATAGTGATGTCACGAAATTAATGATGTTGTTAATG      | Danio rerio            |
| 1351973 | chromosome  | 5              | 140158147 | 140158189 | 1  | CATCTTAATAGTGATGTCACGAAATTAATGATGTTGTTAATG      | Mus musculus           |
| 1354068 | reflig      | reflig_1       | 4567437   | 4567479   | -1 | TTCTTCATTGAATTTGATGTTCTTGGATTAGTACGTTAGA        | Ciona savignyi         |
| 1354068 | chromosome  | 5              | 81521525  | 81521569  | -1 | GAATGATTGCATTAATGATGTCACCAATAAGAGAGCTGTTATA     | Canis familiaris       |
| 1354068 | chromosome  | 16             | 71441080  | 71441124  | -1 | GAATGATTGCATTAATGATGTCACCAATAAGAGAGCTGTTATA     | Homo sapiens           |
| 1354068 | scaffold    | scaffold_14    | 886697    | 886741    | -1 | GAATGATTGCATTAATGATGTCACCAATAAGAGAGCTGTTATA     | Takifugu rubripes      |
| 1354068 | chromosome  | 3q             | 4752237   | 4752279   | -1 | GTATTCATTAATGATGTTGATGTTTTGGATTAGCTGTTAGA       | Ciona intestinalis     |
| 1354068 | chromosome  | 3              | 19213834  | 19213878  | -1 | CAATGATTGCATTAATGATGTCACCAATGTAAGCTGTTTACA      | Oryzias latipes        |
| 1354068 | group       | groupII        | 10807691  | 10807735  | -1 | GCATGATTGCATTAATGATGTCACCAATGTAAGCTGTTTACA      | Gasterosteus aculeatus |
| 1354068 | toplevel    | 7              | 62099765  | 62099809  | 1  | GAATGATTGCATTAATGATGTCACCAATGTAAGCTGTTTACA      | Danio rerio            |
| 1354068 | chromosome  | 8              | 111419699 | 111419743 | 1  | GAATGATTGCATTAATGATGTCACCAATAAGAGAGCTGTTTACA    | Mus musculus           |
| 1353929 | reflig      | reflig_3       | 714592    | 714634    | 1  | ATCGAATTAATGATGTCATGATGTCACCAATGATGTCACCAAT     | Ciona savignyi         |
| 1353929 | chromosome  | 11             | 56364491  | 56364532  | 1  | ATAGAATTCATGATCAATCATGTTTCGGTGATAGTACCAT        | Canis familiaris       |
| 1353929 | chromosome  | 9              | 36969055  | 36969096  | 1  | ATAGAATTCATGATCAATCATGTTTCGGTGATAGTACCAT        | Homo sapiens           |
| 1353929 | scaffold    | scaffold_333   | 109480    | 109521    | -1 | ATGGAATTCATGATCAATCATGATGTCACCAATGATGTCACCAAT   | Takifugu rubripes      |
| 1353929 | chromosome  | 4q             | 3837277   | 3837317   | -1 | ATGGAATTCATGATCAATCATGATGTCACCAATGATGTCACCAAT   | Ciona intestinalis     |
| 1353929 | group       | groupIX        | 1501806   | 1501847   | 1  | ATGGAATTCATGATCAATCATGATGTCACCAATGATGTCACCAAT   | Gasterosteus aculeatus |
| 1353929 | chromosome  | 1              | 16590106  | 16590147  | 1  | ATGGAATTCATGATCAATCATGATGTCACCAATGATGTCACCAAT   | Oryzias latipes        |
| 1353929 | toplevel    | 12             | 47246605  | 47246643  | 1  | GAATTCATGATCAATCATGATGTCACCAATGATGTCACCAAT      | Danio rerio            |
| 1353929 | chromosome  | 4              | 44669896  | 44669937  | 1  | ATAGAATTCATGATCAATCATGTTTCGGTGATAGTACCAT        | Mus musculus           |
| 1352298 | reflig      | reflig_76      | 2303576   | 2303615   | -1 | ATTTGACTGCGATAAATTTCCACCCAGTAAACTTATTG          | Ciona savignyi         |
| 1352298 | chromosome  | 9              | 26232196  | 26232236  | -1 | CGAATGCATTTTCAGCAGAATAATTAACCTAATTAACAAAT       | Canis familiaris       |
| 1352298 | chromosome  | 17             | 34972794  | 34972834  | 1  | CGAATGCATTTTCAGCAGAATAATTAACCTAATTAACAAAT       | Homo sapiens           |
| 1352298 | scaffold    | scaffold_80    | 807952    | 807992    | -1 | CAAATGAATTTTCAGCAGAATAATTAACCTAATTAACAAAT       | Takifugu rubripes      |
| 1352298 | chromosome  | 14q            | 1957841   | 1957880   | 1  | CAAATGAATTTTCAGCAGAATAATTAACCTAATTAACAAAT       | Ciona intestinalis     |
| 1352298 | group       | groupIII       | 13097996  | 13098036  | -1 | CAAATGAATTTTCAGCAGAATAATTAACCTAATTAACAAAT       | Gasterosteus aculeatus |
| 1352298 | chromosome  | 17             | 30337035  | 30337075  | 1  | CAAATGAATTTTCAGCAGAATAATTAACCTAATTAACAAAT       | Oryzias latipes        |
| 1352298 | toplevel    | 24             | 30905731  | 30905771  | 1  | CAAATGAATTTTCAGCAGAATAATTAACCTAATTAACAAAT       | Danio rerio            |
| 1352298 | chromosome  | 11             | 98145076  | 98145116  | 1  | CGAATGCATTTTCAGCAGAATAATTAACCTAATTAACAAAT       | Mus musculus           |
| 1349598 | reflig      | reflig_7       | 959931    | 959977    | 1  | TGGACCCACTTAAACCTGACAAATTAACCTGACCAATTCGGTAAAC  | Ciona savignyi         |
| 1349598 | chromosome  | 9              | 60663634  | 60663682  | 1  | CATACTACATTAACCCCTGGCAATGCTTCCAATGACCCCAATTAAGC | Canis familiaris       |
| 1349598 | chromosome  | 9              | 127645958 | 127646006 | -1 | CATACTACATTAACCCCTGGCAATGCTTCCAATGACCCCAATTAAGC | Homo sapiens           |
| 1349598 | scaffold    | scaffold_18    | 737830    | 737878    | -1 | CATACTACATTAACCCCTGGCAATGCTTCCAATGACCCCAATTAAGC | Takifugu rubripes      |
| 1349598 | chromosome  | 8q             | 575858    | 575903    | 1  | CAAAACCTTTAACCCCTGGCAATGCTTCCAATGACCCCAATTAAGC  | Ciona intestinalis     |
| 1349598 | group       | groupXIII      | 13552500  | 13552548  | -1 | CATACTACATTAACCCCTGGCAATGCTTCCAATGACCCCAATTAAGC | Gasterosteus aculeatus |
| 1349598 | chromosome  | 9              | 18956224  | 18956272  | -1 | CATACTACATTAACCCCTGGCAATGCTTCCAATGACCCCAATTAAGC | Oryzias latipes        |
| 1349598 | toplevel    | 8              | 32412525  | 32412570  | -1 | CATAGTACATTAACCCCTGGCAATGCTTCCAATGACCCCAATTAAGC | Danio rerio            |
| 1349598 | chromosome  | 2              | 34144179  | 34144227  | 1  | CATACTACATTAACCCCTGGCAATGCTTCCAATGACCCCAATTAAGC | Mus musculus           |
| 1349882 | reflig      | reflig_0       | 2698389   | 2698432   | -1 | TTGCTTTTATTCTAATGACTCTGGAAATGTAATTCATTTGCTCT    | Ciona savignyi         |
| 1349882 | chromosome  | 18             | 4720130   | 4720174   | 1  | GTCATTTAATTAATGAGTTGAAATTTGCATTTGATGTTGCCAT     | Canis familiaris       |
| 1349882 | chromosome  | 7              | 50417470  | 50417514  | 1  | GTCATTTAATTAATGAGTTGAAATTTGCATTTGATGTTGCCAT     | Homo sapiens           |
| 1349882 | scaffold    | scaffold_53    | 920771    | 920815    | -1 | TTGCTTTTATTCTAATGACTCTGGAAATGTAATTCATTTGCTCT    | Takifugu rubripes      |
| 1349882 | chromosome  | 10p            | 1798566   | 1798610   | -1 | TTGCTTTAATTAATGAGTTGAAATTTGCATTTGATGTTGCCAT     | Ciona intestinalis     |
| 1349882 | group       | groupVI        | 2474219   | 2474263   | -1 | TTGCTTTTATTCTAATGACTCTGGAAATGTAATTCATTTGCTCT    | Gasterosteus aculeatus |
| 1349882 | scaffold    | scaffold1046   | 33337     | 33381     | -1 | TTCACTTTAATCAATGAGCTGAAATTTGCATTTGATGTTGCCG     | Oryzias latipes        |
| 1349882 | toplevel    | 13             | 16565208  | 16565253  | 1  | TTCACTTTAATCAATGAGCTGAAATTTGCATTTGATGTTGCCG     | Danio rerio            |
| 1349882 | chromosome  | 11             | 11653750  | 11653794  | 1  | GTCATTTAATTAATGAGTTGAAATTTGCATTTGATGTTGCCAT     | Mus musculus           |
| 1351347 | reflig      | reflig_19      | 4555562   | 4555603   | -1 | ATTCCTCTGGTTCTCACCGACACTTACGAAATGAGCTTT         | Ciona savignyi         |
| 1351347 | chromosome  | 2              | 63463463  | 63463503  | -1 | AGTCCCTTTAGTGCTCGGAGGACTTTAATAAAATGATTTT        | Canis familiaris       |
| 1351347 | chromosome  | 16             | 53975811  | 53975851  | 1  | AGTCCCTTTAGTGCTCGGAGGACTTTAATAAAATGATTTT        | Homo sapiens           |
| 1351347 | scaffold    | scaffold_28    | 1520008   | 1520048   | 1  | ACTCCCTTTAGTGCTCGGAGGACTTTAATAAAATGATTTT        | Takifugu rubripes      |
| 1351347 | chromosome  | 2q             | 5718488   | 5718529   | -1 | ATTCCTCTGGTCTTACCGACACTTACGAAATGAGTTT           | Ciona intestinalis     |
| 1351347 | group       | groupII        | 16870807  | 16870847  | -1 | ACTCCCTTTAGTGCTCGGAGGACTTTAATAAAATGATTTT        | Gasterosteus aculeatus |
| 1351347 | chromosome  | 3              | 28042939  | 28042979  | -1 | ACTCCCTTTAGTGCTCGGAGGACTTTAATAAAATGATTTT        | Oryzias latipes        |
| 1351347 | toplevel    | 7              | 28001305  | 28001344  | 1  | CTCCCTTTAGTGCTCGGAGGACTTTAATAAAATGATTTT         | Danio rerio            |

|         |            |              |           |           |    |                                                        |                        |
|---------|------------|--------------|-----------|-----------|----|--------------------------------------------------------|------------------------|
| 1351347 | chromosome | 8            | 95259441  | 95259481  | 1  | GGTCCCTTTAGTCGCTGGAGGACTTTAATAAAATGATTTT               | Mus musculus           |
| 1350417 | reflitg    | 65           | 843844    | 843887    | -1 | AAACGATAGTTTAAATTCGAATCTTCTTCTGTAATTAATGT              | Ciona savignyi         |
| 1350417 | chromosome | 28           | 41540800  | 41540841  | 1  | AAATTTGAATTTGAATTAGAATAATCTTGATAAATTAATGAA             | Canis familiaris       |
| 1350417 | chromosome | 10           | 131581705 | 131581746 | 1  | AAATTTGAATTTGAATTAGAATAATCTTGATAAATTAATGAA             | Homo sapiens           |
| 1350417 | scaffold   | 76           | 480635    | 480676    | 1  | AAATTTGAATTTGAATTAGAATAATCTTGATAAATTAATGAA             | Takifugu rubripes      |
| 1350417 | chromosome | 8q           | 1649400   | 1649443   | -1 | AAACTTAGGTTTAAATTAGAACACCTTCTCGTGAATTAATGTG            | Ciona intestinalis     |
| 1350417 | group      | groupVI      | 11279688  | 11279729  | -1 | AAATTTGAATTTGAATTAGAATAATCTTGATAAATTAATGAA             | Gasterosteus aculeatus |
| 1350417 | chromosome | 15           | 18874102  | 18874143  | 1  | AAATTTGAATTTGAATTAGAATAATCTTGATAAATTAATGAA             | Oryzias latipes        |
| 1350417 | toplevel   | 12           | 39079495  | 39079536  | 1  | AAATTTGAATTTGAATTAGAATAATCTTGATAAATTAATGAA             | Danio rerio            |
| 1350417 | chromosome | 7            | 144442366 | 144442407 | 1  | AAATTTGAATTTGAATTAGAATAATCTTGATAAATTAATGAA             | Mus musculus           |
| 1351352 | reflitg    | 55           | 787245    | 787289    | 1  | TTTCGAACATGATGAATGGCTGGCACATTAGACAATTGATCAGA           | Ciona savignyi         |
| 1351352 | chromosome | 9            | 62384063  | 62384104  | -1 | TTAGTGAGCAAGCAGAGGATCACACATAATATTGATCAGA               | Canis familiaris       |
| 1351352 | chromosome | 9            | 125594769 | 125594810 | 1  | TTAGTGAGCAAGCAGAGGATCACACATAATATTGATCAGA               | Homo sapiens           |
| 1351352 | scaffold   | scaffold_334 | 82241     | 82282     | -1 | TTAGTGAGCAAGCTCAGTATCACACATAATATTGATCAGA               | Takifugu rubripes      |
| 1351352 | chromosome | 9q           | 472681    | 472726    | 1  | TTTTTGAGCATGATGAATGAACCTGGCACATTAGACAATTGATCAGG        | Ciona intestinalis     |
| 1351352 | chromosome | 9            | 27501569  | 27501610  | 1  | TTAGTGAGCAAGCTCAGTATCACACATAATATTGATCAGA               | Oryzias latipes        |
| 1351352 | group      | groupXIII    | 557066    | 557107    | 1  | TTAGTGAGCAAGCTCAGTATCACACATAATATTGATCAGA               | Gasterosteus aculeatus |
| 1351352 | toplevel   | 8            | 50437734  | 50437776  | -1 | TTAGTGAGCAAGTAGAGATCGTGGCATTAAATATTGATCAGA             | Danio rerio            |
| 1351352 | chromosome | 2            | 38015409  | 38015450  | 1  | TTAGTGAGCAAGCAGAGGATCACACATAATATTGATCAGA               | Mus musculus           |
| 1353285 | reflitg    | 55           | 454036    | 454085    | -1 | TATAATTTTACCACCGCTCATCTTTATTTTACCACCTCCCTTGAAGC        | Ciona savignyi         |
| 1353285 | chromosome | 28           | 16329455  | 16329506  | 1  | TTAAGTATTCAAACCTCATTACATCCTTATTTTCAATTTGCTGCCACAGT     | Canis familiaris       |
| 1353285 | chromosome | 10           | 102372564 | 102372615 | 1  | TTAAGTATTCAAACCTCATTACATCCTTATTTTCAATTTGCTGCCACAGT     | Homo sapiens           |
| 1353285 | scaffold   | scaffold_59  | 792966    | 793017    | 1  | TTAAGTATTCAAGCCTCATTACATCCTTATTTTCAATTTGCTGCCACAGT     | Takifugu rubripes      |
| 1353285 | chromosome | 9p           | 3475365   | 3475415   | -1 | TTAATTTTACCACCGCTCATCTTTATTTTACCACCGCTTGAAGT           | Ciona intestinalis     |
| 1353285 | chromosome | 19           | 10220112  | 10220163  | -1 | TTAAGTATTCAAACCTCATTACATCCTTATTTTCAATTTGCTGCCACAGT     | Oryzias latipes        |
| 1353285 | group      | groupV       | 979774    | 979825    | -1 | TTAAGTATTCAAACCTCATTACATCCTTATTTTCAATTTGCTGCCACAGT     | Gasterosteus aculeatus |
| 1353285 | toplevel   | 12           | 47408180  | 47408231  | -1 | TTAAGTATTCAAACCTCATTGCGTCTTATTTTCAATTTGCTGCCACAGT      | Danio rerio            |
| 1353285 | chromosome | 19           | 44715982  | 44716033  | 1  | TTAAGTATTCAAACCTCATTACATCCTTATTTTCAATTTGCTGCCACAGT     | Mus musculus           |
| 1351380 | reflitg    | 325          | 179070    | 179118    | 1  | AGTCGAATTTAGTACAAATTTGATTTAAGATTACGAGTTATATTGCAG       | Ciona savignyi         |
| 1351380 | chromosome | 1            | 123485630 | 123485677 | 1  | GCAGCACAGATGAAAAATGTTTTAATTTTGAAGCTGCTTTATGGCAG        | Canis familiaris       |
| 1351380 | chromosome | 19           | 36328832  | 36328879  | -1 | GCAGCACAGATGAAAAATGTTTTAATTTTGAAGCTGCTTTATGGCAG        | Homo sapiens           |
| 1351380 | scaffold   | scaffold_117 | 608473    | 608521    | 1  | AGCAGCACAGATGAAAAATGTTTTAATTTTGAAGCTGCTTTATGGCAG       | Takifugu rubripes      |
| 1351380 | chromosome | 8q           | 2366697   | 2366745   | 1  | AGTCGATTTAGTACAAATTTGATTTAAGATTAGCAGTTATATTGCAG        | Ciona intestinalis     |
| 1351380 | group      | groupII      | 1532514   | 1532562   | -1 | AGCGGCACAGATGAAAAATGTTTTAATTTTGAAGCTGCTTTATGGCAG       | Gasterosteus aculeatus |
| 1351380 | chromosome | 3            | 35697936  | 35697984  | 1  | AGCGGTGCAGATGAAAAATGTTTTAATTTTGAAGCTGCTTTATGGCAG       | Oryzias latipes        |
| 1351380 | toplevel   | 7            | 42554933  | 42554980  | 1  | GCAGCACAGATGAAAAATGTTTTAATTTTGAAGCTGCTTTATGGCAG        | Danio rerio            |
| 1351380 | chromosome | 7            | 37681703  | 37681750  | 1  | GCAGCACAGATGAAAAATGTTTTAATTTTGAAGCTGCTTTATGGCAG        | Mus musculus           |
| 1353403 | reflitg    | 54           | 2939522   | 2939565   | -1 | GCTGCTTTTAAAGCAATGAACCTACGAGCGCTCCGTTCCGCTT            | Ciona savignyi         |
| 1353403 | chromosome | 21           | 35016926  | 35016969  | 1  | GCTGCTTTTAAAGCAATGAACCTACGAGCTTATGAGATTAGCATTTATGAAT   | Canis familiaris       |
| 1353403 | chromosome | 11           | 8308121   | 8308164   | 1  | GCTGCTTTTAAAGCAATGAACCTACGAGCTTATGAGATTAGCATTTATGAAT   | Homo sapiens           |
| 1353403 | scaffold   | scaffold_14  | 142379    | 142423    | 1  | GCTGCTTTTAAAGCAATGAACCTACGAGCTTATGAGATTAGCATTTATGAAT   | Takifugu rubripes      |
| 1353403 | chromosome | 12q          | 2066120   | 2066163   | -1 | GCTGCTTTTAAAGCAATGAACCTACGAGCTTATGAGATTAGCATTTATGAAT   | Ciona intestinalis     |
| 1353403 | group      | groupIII     | 9921452   | 9921496   | 1  | GCTGCTTTTAAAGCAATGAACCTACGAGCTTATGAGATTAGCATTTATGAAT   | Gasterosteus aculeatus |
| 1353403 | chromosome | 3            | 18097353  | 18097397  | 1  | GCTGCTTTTAAAGCAATGAACCTACGAGCTTATGAGATTAGCATTTATGAAT   | Oryzias latipes        |
| 1353403 | toplevel   | 7            | 23558469  | 23558513  | -1 | GCTGCTTTTAAAGCAATGAACCTACGAGCTTATGAGATTAGCATTTATGAAT   | Danio rerio            |
| 1353403 | chromosome | 7            | 116375545 | 116375588 | 1  | GCTGCTTTTAAAGCAATGAACCTACGAGCTTATGAGATTAGCATTTATGAAT   | Mus musculus           |
| 1352363 | reflitg    | 1            | 122695    | 122736    | -1 | CGGTTTTTGTGAGTTTGTGCGAGCCGAGCTGAAGCTCGTGGT             | Ciona savignyi         |
| 1352363 | chromosome | 2            | 88120119  | 88120159  | 1  | CATTTATGTTGAGTCTATTATAATCTGTTAGCAGGTGG                 | Canis familiaris       |
| 1352363 | scaffold   | scaffold_20  | 10717071  | 10717111  | -1 | CATTTATGTTGAGTCTATTATAATCTGTTAGCAGGTGG                 | Homo sapiens           |
| 1352363 | scaffold   | scaffold_237 | 34242     | 34283     | 1  | CATTTATGTTGAGTCTATTATAATCTGTTAGCAGGTGG                 | Takifugu rubripes      |
| 1352363 | chromosome | 7            | 9790164   | 9790204   | -1 | CATTTATGTTGAGTCTATTATAATCTGTTAGCAGGTGG                 | Ciona intestinalis     |
| 1352363 | group      | groupXII     | 9306643   | 9306683   | -1 | CATTTATGTTGAGTCTATTATAATCTGTTAGCAGGTGG                 | Oryzias latipes        |
| 1352363 | toplevel   | 23           | 25556417  | 25556457  | 1  | CATTTATGTTGAGTCTATTATAATCTGTTAGCAGGTGG                 | Gasterosteus aculeatus |
| 1352363 | chromosome | 4            | 148235019 | 148235059 | 1  | CATTTATGTTGAGTCTATTATAATCTGTTAGCAGGTGG                 | Danio rerio            |
| 1353009 | reflitg    | 375          | 110783    | 110825    | -1 | ACAAACCGACAGTTCAAAATCATAGCGGCTTACCGGTAAC               | Mus musculus           |
| 1353009 | chromosome | 20           | 23764424  | 23764461  | -1 | ACAAACCGACAGTTCAAAATCATAGCGGCTTACCGGTAAC               | Ciona savignyi         |
| 1353009 | chromosome | 3            | 71360415  | 71360452  | 1  | ACAAAGGACATAGTTCATCATGACATTTCCAGCAATT                  | Canis familiaris       |
| 1353009 | scaffold   | scaffold_150 | 645164    | 645201    | 1  | ACAAAGGACATAGTTCATCATGACATTTCCAGCAATT                  | Homo sapiens           |
| 1353009 | chromosome | 4q           | 1806318   | 1806359   | 1  | ATAAACCGACAGTTCAAAATCATAGCATTCTGCAATT                  | Takifugu rubripes      |
| 1353009 | group      | groupXVII    | 13921172  | 13921209  | -1 | ATAAACCGACAGTTCAAAATCATAGCATTCTGCAATT                  | Ciona intestinalis     |
| 1353009 | chromosome | 5            | 4936954   | 4936991   | -1 | ATACAGAGACATAGTTCATCATGACATTTTGTGCAATT                 | Gasterosteus aculeatus |
| 1353009 | toplevel   | 6            | 30555514  | 30555548  | 1  | CAAGGACATAGTTCATCATGACATTTTGTGCAATT                    | Oryzias latipes        |
| 1353009 | chromosome | 6            | 99140069  | 99140106  | 1  | ACAAAGGACATAGTTCATCATGACATTTTGTGCAATT                  | Danio rerio            |
| 1351235 | reflitg    | 268          | 68196     | 68235     | -1 | AAATTCACCTGTTGATGTTGACGCGTGTATTGTTACCG                 | Mus musculus           |
| 1351235 | chromosome | 21           | 41492368  | 41492407  | 1  | AAATTCACCTGTTGATGTTGACGCGTGTATTGTTACCG                 | Ciona savignyi         |
| 1351235 | chromosome | 11           | 15479848  | 15479887  | 1  | AAATTCACCTGTTGATGTTGACGCGTGTATTGTTACCG                 | Canis familiaris       |
| 1351235 | scaffold   | scaffold_1   | 7191474   | 7191513   | -1 | AAATTCACCTGTTGATGTTGACGCGTGTATTGTTACCG                 | Homo sapiens           |
| 1351235 | chromosome | 1p           | 1633359   | 1633402   | 1  | AAATTCACCTGTTGATGTTGACGCGTGTATTGTTACCG                 | Takifugu rubripes      |
| 1351235 | group      | groupIII     | 9662103   | 9662142   | -1 | AAATTCACCTGTTGATGTTGACGCGTGTATTGTTACCG                 | Ciona intestinalis     |
| 1351235 | chromosome | 3            | 17728807  | 17728846  | -1 | AAATTCACCTGTTGATGTTGACGCGTGTATTGTTACCG                 | Gasterosteus aculeatus |
| 1351235 | toplevel   | 7            | 18612690  | 18612727  | -1 | AAATTCACCTGTTGATGTTGACGCGTGTATTGTTACCG                 | Oryzias latipes        |
| 1351235 | chromosome | 7            | 122232668 | 122232707 | 1  | AAATTCACCTGTTGATGTTGACGCGTGTATTGTTACCG                 | Danio rerio            |
| 1353035 | reflitg    | 5            | 1570349   | 1570402   | 1  | CGTAAAATTAACGCTGTTAATCTATGTCCTGTTCTGACCGGATAGATTAT     | Mus musculus           |
| 1353035 | chromosome | 22           | 28924518  | 28924571  | 1  | CATAAATTAAGCTGTCATTCATAAGATTTATGGATTCTCATTGGCATATTGCAT | Ciona savignyi         |
| 1353035 | chromosome | 13           | 71199310  | 71199363  | 1  | CATAAATTAAGCTGTCATTCATAAGATTTATGGATTCTCATTGGCATATTGCAT | Canis familiaris       |
| 1353035 | scaffold   | scaffold_31  | 409092    | 409145    | -1 | CATAAATTAAGCTGTCATTCATAAGATTTATGGATTCTCATTGGCATATTGCAT | Homo sapiens           |
| 1353035 | chromosome | 3q           | 1755860   | 1755911   | -1 | CATAAATTAAGCTGTCATTCATAAGATTTATGGATTCTCATTGGCATATTGCAT | Takifugu rubripes      |
| 1353035 | chromosome | 21           | 9488035   | 9488088   | 1  | CATAAATTAAGCTGTCATTCATAAGATTTATGGATTCTCATTGGCATATTGCAT | Ciona intestinalis     |
| 1353035 | group      | groupXVI     | 2722469   | 2722522   | -1 | CATAAATTAAGCTGTCATTCATAAGATTTATGGATTCTCATTGGCATATTGCAT | Oryzias latipes        |
| 1353035 | toplevel   | 9            | 24892366  | 24892419  | -1 | CATAAATTAAGCTGTCATTCATAAGATTTATGGATTCTCATTGGCATATTGCAT | Gasterosteus aculeatus |
| 1353035 | chromosome | 14           | 98446305  | 98446358  | 1  | CATAAATTAAGCTGTCATTCATAAGATTTATGGATTCTCATTGGCATATTGCAT | Danio rerio            |
| 1350231 | reflitg    | 37           | 1557639   | 1557685   | -1 | TCAGTTGATTTAACACATATCATGCTGTTGAGATAGACTGTTTAT          | Mus musculus           |
| 1350231 | chromosome | 9            | 26232169  | 26232214  | -1 | ATTAACCTAATTAACAAATTCACATGATATTATCAGGCTATTAA           | Ciona savignyi         |
| 1350231 | chromosome | 17           | 34972816  | 34972861  | 1  | ATTAACCTAATTAACAAATTCACATGATATTATCAGGCTATTAA           | Canis familiaris       |
| 1350231 | scaffold   | scaffold_29  | 1341496   | 1341541   | 1  | ATTAACCTAATTAACAAATTCACATGATATTATCAGGCTATTAA           | Homo sapiens           |
| 1350231 | chromosome | 10q          | 3268625   | 3268670   | -1 | ATCAGTTGATTTAACACTAATATGCATGTTGACTAGCCTAGTAC           | Takifugu rubripes      |
| 1350231 | chromosome | 19           | 8639464   | 8639509   | 1  | ATTAACCTAATTAACAAATTCACATGATATTATCAGGCTATTAA           | Ciona intestinalis     |
| 1350231 | group      | groupV       | 8010973   | 8011018   | -1 | ATTAACCTAATTAACAAATTCACATGATATTATCAGGCTATTAA           | Oryzias latipes        |
| 1350231 | toplevel   | 24           | 30905753  | 30905796  | 1  | ATTAACCTAATTAACAAATTCACATGATATTATCAGGCTATTAA           | Gasterosteus aculeatus |
| 1350231 | toplevel   | 24           | 30905753  | 30905796  | 1  | ATTAACCTAATTAACAAATTCACATGATATTATCAGGCTATTAA           | Danio rerio            |



|         |            |              |           |           |    |                                                      |                        |
|---------|------------|--------------|-----------|-----------|----|------------------------------------------------------|------------------------|
| 1350231 | chromosome | 11           | 98145098  | 98145143  | 1  | ATTAACCTAAATTAACAATAATTCACATGCATATTATCATCAGGCTATTAA  | Mus musculus           |
| 1352950 | reflig     | reftig_35    | 883406    | 883453    | 1  | TACTGGCATAACAAGGAAGTCTGCTGGAACAATAATCATGTTGCA        | Ciona savignyi         |
| 1352950 | chromosome | 7            | 65038284  | 65038330  | -1 | TACTGTATGGAGAAATGAAGTCTGAGCCAGGGCAAAAAATAAATTATA     | Canis familiaris       |
| 1352950 | chromosome | 18           | 22520972  | 22521018  | 1  | TACTGTACGAGGAAATGAAGTCTGAGCCAGGGCAAAAAATAAATTATA     | Homo sapiens           |
| 1352950 | scaffold   | scaffold_289 | 239597    | 239643    | -1 | TACTGGAGGAGAAATGAAGTCTGAGCCAGGCAATAATAAATAAATTATA    | Takifugu rubripes      |
| 1352950 | chromosome | 3q           | 1319852   | 1319899   | -1 | TGCTGACGCAACAAGGAAGTCTGCTGGAACAATAATCATGTTGCA        | Ciona intestinalis     |
| 1352950 | group      | groupIII     | 912491    | 912537    | -1 | TACTGGAGGAGAAATGAAGTCTGAGCCAGGCAATAATAAATAAATTATA    | Gasterosteus aculeatus |
| 1352950 | chromosome | 17           | 26518718  | 26518764  | 1  | TACTGGAGGAGAAATGAAGTCTGAGCCAGGCAATAATAAATAAATTATA    | Oryzias latipes        |
| 1352950 | toplevel   | 20           | 18291001  | 18291039  | -1 | AGGGGAAATGAAGTCTGAGCCAGGCAATAATAAATAAATTATA          | Danio rerio            |
| 1352950 | chromosome | 18           | 15334526  | 15334572  | 1  | TACTGTACGAGGAAATGAAGTCTGAGCCAGGGCAAAAAATAAATTATA     | Mus musculus           |
| 1352851 | reflig     | reftig_0     | 1543020   | 1543064   | 1  | ATAACTTTTCATTTCAATATTTTAAATTTTCGGCGATCATAAA          | Ciona savignyi         |
| 1352851 | chromosome | 38           | 18535428  | 18535470  | -1 | ACTTCCCTTTCAATATTTGTGCAACTTTATCTCCACCGCACAA          | Canis familiaris       |
| 1352851 | chromosome | 1            | 219116734 | 219116776 | -1 | ACTTCCCTTTCAATATTTGTGCAACTTTATCTCCACCGGCAA           | Homo sapiens           |
| 1352851 | scaffold   | scaffold_287 | 321946    | 321989    | 1  | ACTTCCCTTTTCATATTTGTGCAACTTTATCTGACCGGCAA            | Takifugu rubripes      |
| 1352851 | chromosome | 10q          | 2073859   | 2073900   | -1 | ACTTTCATTTCAATATTTGTTTAAATTTTCACGATCAGAAA            | Ciona intestinalis     |
| 1352851 | group      | groupVIII    | 9772234   | 9772277   | -1 | ACTTCCCTTTTCATATTTGTGCAACTTTATCTGACCTGCAA            | Gasterosteus aculeatus |
| 1352851 | chromosome | 24           | 5612180   | 5612223   | 1  | ACTTCCCTTTTCATATTTGTGCAACTTTATCTCAACCTGCAA           | Oryzias latipes        |
| 1352851 | toplevel   | 20           | 54495263  | 54495306  | -1 | ACTTCCCTTTTCATATTTGTGCAACTTTATCTCAACCTGCAA           | Danio rerio            |
| 1352851 | chromosome | 1            | 186559127 | 186559169 | 1  | ACTTCCCTTTTCATATTTGTGCAACTTTATCTCCACCGGCAA           | Mus musculus           |
| 1350742 | reflig     | reftig_5     | 722808    | 722848    | 1  | TCAGTTTTGTTTATCGTAATAAAGGCTTTACAATTTGGCA             | Ciona savignyi         |
| 1350742 | chromosome | 35           | 21546948  | 21546987  | 1  | CCCTCTTTGTTCTTCACAAATAAAGGTTTTTAAATAAAT              | Canis familiaris       |
| 1350742 | chromosome | 6            | 20142626  | 20142665  | 1  | CCCTCTTTGTTCTTCACAAATAAAGGTTTTTAAATAAAT              | Homo sapiens           |
| 1350742 | scaffold   | scaffold_58  | 910644    | 910684    | -1 | TCCTCTTTGTTCTTCACAAATAAAGGTTTTTAAATAAAT              | Takifugu rubripes      |
| 1350742 | chromosome | 1p           | 2161132   | 2161172   | -1 | TCATTTTTGTTTATCGTAATAAAGGCTTTACAATTTGGCT             | Ciona intestinalis     |
| 1350742 | group      | groupXX      | 1433403   | 1433443   | -1 | TCCTCTTTGTTCTTCACAAATAAAGGTTTTTAAATAAAT              | Gasterosteus aculeatus |
| 1350742 | chromosome | 16           | 1699244   | 1699284   | 1  | TCCTCTTTGTTCTTCACAAATAAAGGTTTTTAAATAAAT              | Oryzias latipes        |
| 1350742 | toplevel   | 16           | 6256203   | 6256242   | -1 | TCCTCTTTGTTCTTCACAAATAAAGGTTTTTAAATAAAT              | Danio rerio            |
| 1350742 | chromosome | 13           | 48539415  | 48539455  | 1  | CCCTCTTTGTTCTTCACAAATAAAGGTTTTTAAATAAAT              | Mus musculus           |
| 1353497 | reflig     | reftig_14    | 664642    | 664685    | 1  | GTTTGCAACTCTTAAATTTATATTTGTGCAAGCAAAATTTTA           | Ciona savignyi         |
| 1353497 | chromosome | 29           | 27672371  | 27672411  | 1  | ATGTAATTAGTGCTTAATTTATTAACATATGCAAAATTTGTC           | Canis familiaris       |
| 1353497 | chromosome | 8            | 77761826  | 77761866  | 1  | ATGTAATTAGTGCTTAATTTATTAACATATGCAAAATTTGTC           | Homo sapiens           |
| 1353497 | scaffold   | scaffold_157 | 213660    | 213700    | 1  | GTGTAATTAGTGCTTAATTTATTAACATATGCAAAATTTGTC           | Takifugu rubripes      |
| 1353497 | chromosome | 1q           | 1951407   | 1951450   | -1 | GTTTACTATCTTAAATTTATATTTGTGCAAGCAAAATCTTC            | Ciona intestinalis     |
| 1353497 | group      | groupXXI     | 4902546   | 4902586   | 1  | GTGTAATTAGTGCTTAATTTATTAACATATGCAAAATTTGTC           | Gasterosteus aculeatus |
| 1353497 | chromosome | 20           | 11884944  | 11884984  | 1  | GTGTAATTAGTGCTTAATTTATTAACATATGCAAAATTTGTC           | Oryzias latipes        |
| 1353497 | toplevel   | 24           | 21894672  | 21894710  | -1 | GTGTAATTAGTGCTTAATTTATTAACATATGCAAAATTTGTC           | Danio rerio            |
| 1353497 | chromosome | 3            | 5224837   | 5224877   | 1  | ATGTAATTAGTGCTTAATTTATTAACATATGCAAAATTTGTC           | Mus musculus           |
| 1353839 | reflig     | reftig_25    | 1045488   | 1045537   | 1  | CTCTAACACAAAATCGCAACTGTTACACCTATAATGGGACTTATGACGT    | Ciona savignyi         |
| 1353839 | chromosome | 9            | 60610842  | 60610886  | 1  | CCAAGCAAAAATGCAAAATGTAGCACTGAAAGCTCCTTATTAAT         | Canis familiaris       |
| 1353839 | chromosome | 9            | 127702473 | 127702517 | -1 | CCAAGCAAAAATGCAAAATGTAGCACTGAAAGCTCCTTATTAAT         | Homo sapiens           |
| 1353839 | scaffold   | scaffold_18  | 762981    | 763025    | -1 | CCAAGCAAAAATGCAAAATGTAGCACTGAAAGCTCCTTATTAAT         | Takifugu rubripes      |
| 1353839 | chromosome | 7q           | 691518    | 691566    | 1  | CCGGGCATAAAAATGCAACTGTTGCACTCATAATGGCACTTAAGACGT     | Ciona intestinalis     |
| 1353839 | group      | groupXIII    | 13574837  | 13574881  | -1 | CCAAGCAAAAATGCAAAATGTAGCACTGAAAGCTCCTTATTAAT         | Gasterosteus aculeatus |
| 1353839 | chromosome | 9            | 18985620  | 18985664  | -1 | CCAAGCAAAAATGCAAAATGTAGCACTGAAAGCTCCTTATTAAT         | Oryzias latipes        |
| 1353839 | toplevel   | 8            | 32473222  | 32473266  | -1 | CCCAGCAAAAATGCAAAATGTAGCACTGAAAGCTCCTTATTAAT         | Danio rerio            |
| 1353839 | chromosome | 2            | 34095209  | 34095253  | 1  | CCAAGCAAAAATGCAAAATGTAGCACTGAAAGCTCCTTATTAAT         | Mus musculus           |
| 1352295 | reflig     | reftig_132   | 316368    | 316410    | 1  | TGTTTGTCTTCCCTTGACAGGGTATTTTATAGAGAAAATTTTC          | Ciona savignyi         |
| 1352295 | chromosome | 9            | 60731113  | 60731155  | 1  | TATTTGAATAACACTTGACAGAGTGCCTGAAGATATCATTTTC          | Canis familiaris       |
| 1352295 | chromosome | 9            | 127573018 | 127573060 | -1 | TATTTGAATAACACTTGACAGAGTGCCTGAAGATATCATTTTC          | Homo sapiens           |
| 1352295 | scaffold   | scaffold_18  | 733962    | 734004    | -1 | TATTTGAATAACACTTGACAGAGTGCCTGAAGAAATAAATTTTC         | Takifugu rubripes      |
| 1352295 | chromosome | 9q           | 3166529   | 3166570   | -1 | TGTTTGTGTAACCTTAAACAAAGTATTTATAGAATTAATTTTC          | Ciona intestinalis     |
| 1352295 | group      | groupXIII    | 13548447  | 13548489  | -1 | TATTTGAATAACACTTGACAGAGTGCCTGAAGAAATCATTTTC          | Gasterosteus aculeatus |
| 1352295 | chromosome | 9            | 18952125  | 18952167  | -1 | TATTTGAATAACACTTGACAGAGTGCCTGAAGAAATAAATTTTC         | Oryzias latipes        |
| 1352295 | toplevel   | 8            | 32400701  | 32400743  | -1 | TATTTGAATAACACTTGACAGAGTGCCTGAAGAAATAAATTTTC         | Danio rerio            |
| 1352295 | chromosome | 2            | 34202739  | 34202781  | 1  | TATTTGAATAACACTTGACAGAGTGCCTGAAGATATCATTTTC          | Mus musculus           |
| 1351069 | reflig     | reftig_19    | 4761663   | 4761704   | 1  | GGCAAAAATGAACATTTAATATTTTAAACTGTTTCATGAAT            | Ciona savignyi         |
| 1351069 | chromosome | 28           | 41535111  | 41535152  | 1  | ACCAAAATGAATTTTTATGAGGACTAAAAGTCTCGTGGAAAT           | Canis familiaris       |
| 1351069 | chromosome | 10           | 131575957 | 131575998 | 1  | ACCAAAATGAATTTTTATGAGGACTAAAAGTCTCGTGGAAAT           | Homo sapiens           |
| 1351069 | scaffold   | scaffold_76  | 477158    | 477199    | 1  | ACCAAAATGAATTTTTATGAGGACTAAAAGTCTCGTGGAAAT           | Takifugu rubripes      |
| 1351069 | chromosome | 2q           | 2586230   | 2586271   | 1  | GGCAAAAATGAACATTTAATATTTTAAAGTGTTCATGAAT             | Ciona intestinalis     |
| 1351069 | group      | groupVI      | 11283167  | 11283208  | -1 | ACCAAAATGAATTTTTATGAGGACTAAAAGTCTCGTGGAAAT           | Gasterosteus aculeatus |
| 1351069 | chromosome | 15           | 18870500  | 18870541  | 1  | ACCAAAATGAATTTTTATGAGGACTAAAAGTCTCGTGGAAAT           | Oryzias latipes        |
| 1351069 | toplevel   | 12           | 39064590  | 39064631  | 1  | ACCAAAATGAATTTTTATGAGGACTAAAAGTCTCGCAGGAAAT          | Danio rerio            |
| 1351069 | chromosome | 7            | 144436736 | 144436777 | 1  | ACCAAAATGAATTTTTATGAGGACTAAAAGTCTCGCAGGAAAT          | Mus musculus           |
| 1352875 | reflig     | reftig_1     | 2396776   | 2396829   | -1 | TGTCGAAATTAATTTGGTTTGGAGATTAAGTATGACAAATGAAGGAAAGTTT | Ciona savignyi         |
| 1352875 | chromosome | 1            | 123333223 | 123333273 | 1  | TGATGGATTATAAATCATTCAAGATTAATTAAGATAATGCACAAACTT     | Canis familiaris       |
| 1352875 | chromosome | 19           | 36498492  | 36498542  | -1 | TGATGGATTATAAATCATTCAAGATTAATTAAGATAATGCACAAACTT     | Homo sapiens           |
| 1352875 | scaffold   | scaffold_117 | 553333    | 553383    | 1  | TGATGGATTATAAATCATTCAAGATTAATTAAGATAATGCACAAACTT     | Takifugu rubripes      |
| 1352875 | chromosome | 3p           | 1223684   | 1223736   | -1 | TGCCGAATTAATTTGGTTTGGAGATTAAGTATGACAAATAGCGAGCAAGTT  | Ciona intestinalis     |
| 1352875 | group      | groupIII     | 1607776   | 1607826   | -1 | TGATGGATTATAAATCATTCAAGATTAATTAAGATAATGCACAAACTT     | Gasterosteus aculeatus |
| 1352875 | chromosome | 3            | 35628561  | 35628611  | 1  | TGATGGATTATAAATCATTCAAGATTAATTAAGATAATGCACAAACTT     | Oryzias latipes        |
| 1352875 | toplevel   | 7            | 42455397  | 42455447  | 1  | TGATGGATTATAAATCATTCAAGATTAATTAAGATAATGCACAAACTT     | Danio rerio            |
| 1352875 | chromosome | 7            | 37516935  | 37516985  | 1  | TGATGGATTATAAATCATTCAAGATTAATTAAGATAATGCACAAACTT     | Mus musculus           |
| 1352300 | reflig     | reftig_76    | 2303576   | 2303615   | 1  | CAAAATGAATTTTACTGGGTGAAATTTATCGCAGTACAAAT            | Ciona savignyi         |
| 1352300 | chromosome | 14           | 46790546  | 46790586  | 1  | CAAAATGAATTTTACTGGGTGAAATTTATCGCAGTACAAAT            | Canis familiaris       |
| 1352300 | chromosome | 7            | 31241095  | 31241135  | 1  | CAAAATGAATTTTACTGGGTGAAATTTATCGCAGTACAAAT            | Homo sapiens           |
| 1352300 | scaffold   | scaffold_80  | 807952    | 807992    | -1 | CAAAATGAATTTTACTGGGTGAAATTTATCGCAGTACAAAT            | Takifugu rubripes      |
| 1352300 | chromosome | 14q          | 1957841   | 1957880   | 1  | CAAAATGAATTTTACTGGGTGAAATTTATCGCAGTACAAAT            | Ciona intestinalis     |
| 1352300 | group      | groupIII     | 13097996  | 13098036  | -1 | CAAAATGAATTTTACTGGGTGAAATTTATCGCAGTACAAAT            | Gasterosteus aculeatus |
| 1352300 | chromosome | 17           | 30337035  | 30337075  | 1  | CAAAATGAATTTTACTGGGTGAAATTTATCGCAGTACAAAT            | Oryzias latipes        |
| 1352300 | toplevel   | 24           | 30905731  | 30905771  | 1  | CAAAATGAATTTTACTGGGTGAAATTTATCGCAGTACAAAT            | Danio rerio            |
| 1352300 | chromosome | 6            | 55529722  | 55529762  | 1  | CAAAATGAATTTTACTGGGTGAAATTTATCGCAGTACAAAT            | Mus musculus           |
| 1353614 | reflig     | reftig_25    | 303794    | 303832    | -1 | TGTTCTAGAATTTAAAGCTTATGACGCTATAAGCGTGT               | Ciona savignyi         |
| 1353614 | chromosome | 21           | 41492356  | 41492398  | 1  | TGATTGAAAAGAAAATTAATCCTTTTATGATTTAATAATGTGT          | Canis familiaris       |
| 1353614 | chromosome | 11           | 15479836  | 15479878  | 1  | TGATTGAAAAGAAAATTAATCCTTTTATGATTTAATAATGTGT          | Homo sapiens           |
| 1353614 | scaffold   | scaffold_1   | 7191483   | 7191525   | -1 | TGATTGAAAAGAAAATTAATCCTTTTATGATTTAATAATGTGT          | Takifugu rubripes      |
| 1353614 | scaffold   | scaffold_65  | 140194    | 140237    | 1  | TGTTCTAGAACAATAATTTAAACATTATGACGTCACAAAGCGTGT        | Ciona intestinalis     |
| 1353614 | group      | groupIII     | 9662112   | 9662154   | -1 | TGATTGAAAAGAAAATTAATCCTTTTATGATTTAATAATGTGT          | Gasterosteus aculeatus |
| 1353614 | chromosome | 3            | 17728816  | 17728858  | -1 | TGATTGAAAAGAAAATTAATCCTTTTATGATTTAATAATGTGT          | Oryzias latipes        |
| 1353614 | toplevel   | 7            | 18612697  | 18612739  | -1 | TGATTGAAAAGAAAATTAATCCTTTTATGATTTAATAATGTGT          | Danio rerio            |

|         |             |                |           |           |    |                                                   |                        |
|---------|-------------|----------------|-----------|-----------|----|---------------------------------------------------|------------------------|
| 1353614 | chromosome  | 7              | 122232656 | 122232698 | 1  | TGATTGAAAAGAAAATGAACCTTTTGATGTTATAAATGTGT         | Mus musculus           |
| 1354015 | reflig      | reflig_41      | 1002502   | 1002540   | -1 | CTGGTTATTGATTAAAGACCTCGAGTGTCTAGCCAA              | Ciona savignyi         |
| 1354015 | chromosome  | 28             | 41548882  | 41548921  | 1  | CTCATTATTGTGTAATAAGTGTTCGGCAGTTCAGTAAA            | Canis familiaris       |
| 1354015 | chromosome  | 10             | 131589834 | 131589873 | 1  | CTCATTATTGTGTAATAAGTGTTCGGCAGTTCAGTAAA            | Homo sapiens           |
| 1354015 | scaffold    | scaffold_76    | 486016    | 486056    | 1  | CTCATTATTGTGTAATAAGTGTTCGGCAGTTCAGTAAA            | Takifugu rubripes      |
| 1354015 | chromosome  | 4q             | 595006    | 595045    | 1  | CTTGTATTGATTAACAGCAGTGGAAATGTCTTAGCCAA            | Ciona intestinalis     |
| 1354015 | group       | groupVI        | 11274539  | 11274579  | -1 | CTCATTATTGTGTAATAAGTGTTCGGCAGTTCAGTAAA            | Gasterosteus aculeatus |
| 1354015 | chromosome  | 15             | 18880843  | 18880883  | 1  | CTCATTATTGTGTAATAAGTGTTCGGCAGTTCAGTAAA            | Oryzias latipes        |
| 1354015 | toplevel    | 12             | 39091939  | 39091978  | 1  | CTCATTATTGTGTAATAAGTGTTCGGCAGGCTCAGTAAA           | Danio rerio            |
| 1354015 | chromosome  | 7              | 144450296 | 144450335 | 1  | CTCATTATTGTGTAATAAGTGTTCGGCAGTTCAGTAAA            | Mus musculus           |
| 1350232 | reflig      | reflig_37      | 1557640   | 1557685   | -1 | TCAGTTGATTTAACACATATTCATGCATGTTGGAATAGACTAGTTTA   | Ciona savignyi         |
| 1350232 | chromosome  | 9              | 26232170  | 26232214  | -1 | ATTAACCTAATTAACAAATTCACATGCATATTCATCAGGCTATTA     | Canis familiaris       |
| 1350232 | chromosome  | 17             | 34972816  | 34972860  | 1  | ATTAACCTAATTAACAAATTCACATGCATATTCATCAGGCTATTA     | Homo sapiens           |
| 1350232 | scaffold    | scaffold_15    | 1667382   | 1667426   | 1  | ATTAACCTAATTAACAAATTCACATGCATATTCATCAGGCTATTA     | Takifugu rubripes      |
| 1350232 | chromosome  | 10q            | 3268626   | 3268670   | -1 | ATCAGTTGATTTAAACACTAAATTCATGCATGTTGACTAGCCTAGTA   | Ciona intestinalis     |
| 1350232 | group       | groupXI        | 6132209   | 6132253   | 1  | ATTAACCTAATTAACAAATTCACATGCATATTCATCAGGCTATTA     | Gasterosteus aculeatus |
| 1350232 | chromosome  | 8              | 5817574   | 5817618   | -1 | ATTAACCTAATTAACAAATTCACATGCATATTCATCAGGCTATTA     | Oryzias latipes        |
| 1350232 | toplevel    | 24             | 30905753  | 30905796  | 1  | ATTAACCTAATTAACAAATTCATGCATATTCATCAAGCTATT        | Danio rerio            |
| 1350232 | chromosome  | 11             | 98145098  | 98145142  | 1  | ATTAACCTAATTAACAAATTCACATGCATATTCATCAGGCTATTA     | Mus musculus           |
| 1350584 | reflig      | reflig_251     | 76575     | 76615     | 1  | GTGTTGACGAATGACCCCTAATTCGACCTGTCGGATTGT           | Ciona savignyi         |
| 1350584 | chromosome  | 7              | 7536431   | 7536467   | 1  | GCTTTGACAGATGAAAAATGTCAACTGCCTGTTTTT              | Canis familiaris       |
| 1350584 | chromosome  | 1              | 196531285 | 196531321 | -1 | GCTTTGACAGATGAAAAATGTCAACTGCCTGTTTTT              | Homo sapiens           |
| 1350584 | scaffold    | scaffold_208   | 49252     | 49289     | 1  | GCTTTGACAGATGAAAAATGTCAACTGCCTGTTTTT              | Takifugu rubripes      |
| 1350584 | chromosome  | 2q             | 4246667   | 4246707   | 1  | CCGTTTGACAAATGACCCCTAATTCGAAGTGTCCGATTGTT         | Ciona intestinalis     |
| 1350584 | group       | groupVIII      | 8903108   | 8903145   | 1  | GCTTTGACAGATGAAAAATGTCAACTGCCTGTTTTT              | Gasterosteus aculeatus |
| 1350584 | chromosome  | 4              | 15389496  | 15389533  | -1 | GCTTTGACAGATGAAAAATGTCAACTGCCTGTTTTT              | Oryzias latipes        |
| 1350584 | toplevel    | 22             | 16394210  | 16394245  | -1 | GCTTTGACAGATGAAAAATGTCAACTGCCTGTTTTT              | Danio rerio            |
| 1350584 | chromosome  | 1              | 140396780 | 140396816 | 1  | GCTCTGACAGATGAAAAATGTCAACTGCCTGTTTTT              | Mus musculus           |
| 1349616 | reflig      | reflig_19      | 4652332   | 4652374   | 1  | CTTGCAAGTCATGAATTTAAAAGTGATGCGTATTAATAACAT        | Ciona savignyi         |
| 1349616 | chromosome  | 3              | 66582323  | 66582365  | -1 | CATACAATTTACAATAATTAACATCATGTTAATTAGTCACAT        | Canis familiaris       |
| 1349616 | chromosome  | 4              | 16263672  | 16263714  | 1  | CATACAATTTACAATAATTAACATCATGTTAATTAGTCACAT        | Homo sapiens           |
| 1349616 | scaffold    | scaffold_70    | 279015    | 279057    | -1 | CATGCAATTTACAATAATTAACGTTGTTAATTAGTCACAT          | Takifugu rubripes      |
| 1349616 | chromosome  | 2q             | 5787577   | 5787619   | 1  | CATGCAATTTACAATAATTAACGTTGTTAATTAGTCACAT          | Ciona intestinalis     |
| 1349616 | group       | groupIV        | 2753812   | 2753854   | -1 | CATGCAATTTACAATAATTAACGTTGTTAATTAGTCACAT          | Gasterosteus aculeatus |
| 1349616 | ultracontig | ultracontig115 | 367182    | 367224    | 1  | CATGCAATTTACAATAATTAACGTTGTTAATTAGTCACAT          | Oryzias latipes        |
| 1349616 | toplevel    | 20             | 51092060  | 51092102  | 1  | CACGCAATTTACAATAATTAACGTTGTTAATTAGTCACAT          | Danio rerio            |
| 1349616 | chromosome  | 5              | 44971372  | 44971414  | 1  | CATACAATTTACAATAATTAACATCATGTTAATTAGTCACAT        | Mus musculus           |
| 1350234 | reflig      | reflig_37      | 1557640   | 1557685   | -1 | TCAGTTGATTTAACACATATTCATGCATGTTGGAATAGACTAGTTTA   | Ciona savignyi         |
| 1350234 | chromosome  | 14             | 46790568  | 46790612  | 1  | ATTAACCTAATTAACAAATTCATGCATATTCATCAGGCTATTG       | Canis familiaris       |
| 1350234 | chromosome  | 7              | 31241117  | 31241161  | 1  | ATTAACCTAATTAACAAATTCATGCATATTCATCAGGCTATTG       | Homo sapiens           |
| 1350234 | scaffold    | scaffold_15    | 1667382   | 1667426   | 1  | ATTAACCTAATTAACAAATTCATGCATATTCATCAGGCTATTG       | Takifugu rubripes      |
| 1350234 | chromosome  | 10q            | 3268626   | 3268670   | -1 | ATCAGTTGATTTAAACACTAAATTCATGCATGTTGACTAGCCTAGTA   | Ciona intestinalis     |
| 1350234 | group       | groupXI        | 6132209   | 6132253   | 1  | ATTAACCTAATTAACAAATTCACATGCATATTCATCAGGCTATTA     | Gasterosteus aculeatus |
| 1350234 | chromosome  | 8              | 5817574   | 5817618   | -1 | ATTAACCTAATTAACAAATTCACATGCATATTCATCAGGCTATTA     | Oryzias latipes        |
| 1350234 | toplevel    | 24             | 30905753  | 30905796  | 1  | ATTAACCTAATTAACAAATTCATGCATATTCATCAAGCTATT        | Danio rerio            |
| 1350234 | chromosome  | 6              | 55297444  | 55297888  | 1  | ATTAACCTAATTAACAAATTCATGCATATTCATCAGGCTATTG       | Mus musculus           |
| 1351012 | reflig      | reflig_56      | 467486    | 467533    | 1  | GTCAAITAAAAGTGAAAAATCGATAAATAATTAATAAGTAAATTAATG  | Ciona savignyi         |
| 1351012 | chromosome  | 9              | 40230675  | 40230723  | -1 | CTTAATTTAAAAGCAACGGATTAAAAATGATTAATAAGAGTATTAATA  | Canis familiaris       |
| 1351012 | chromosome  | 17             | 32522037  | 32522085  | -1 | CTTAATTTAAAAGCAACGGATTAAAAATGATTAATAAGAGTATTAATA  | Homo sapiens           |
| 1351012 | scaffold    | scaffold_6     | 785167    | 785215    | 1  | CTTAATTTAAAAGCAACAGATTAAAAATGATTAATAAGGGCATTAAATG | Takifugu rubripes      |
| 1351012 | chromosome  | 10q            | 4015519   | 4015565   | 1  | GTCAAITAAAAGCGAAAAATCGTCAATAATTAAGAGAAATTAATG     | Ciona intestinalis     |
| 1351012 | group       | groupVII       | 16342956  | 16343004  | -1 | CTTAATTTAAAAGCAACAGATTAAAAATGATTAATAAGCGTATTAATG  | Gasterosteus aculeatus |
| 1351012 | chromosome  | 14             | 18233652  | 18233700  | -1 | CTTAATTTAAAAGCAACAGATTAAAAATGATTAATAAGGGCATTAAATG | Oryzias latipes        |
| 1351012 | toplevel    | 5              | 49842500  | 49842549  | -1 | CTTAATTTAAAAGCAACGGATTAAAAATGATTAATAAGGGCATTAAATG | Danio rerio            |
| 1351012 | chromosome  | 11             | 84209730  | 84209778  | 1  | CTTAATTTAAAAGCAACGGATTAAAAATGATTAATAAGAGTATTAATA  | Mus musculus           |
| 1352667 | reflig      | reflig_91      | 558890    | 558935    | 1  | GAGCGTAATTTTACCAGAGATTAATAATAATTCATCCATAAG        | Ciona savignyi         |
| 1352667 | chromosome  | 30             | 7407163   | 7407210   | 1  | TTTATTGATCAGTCACTGAGCTAATGTAATATCCTCATCAATAGG     | Canis familiaris       |
| 1352667 | chromosome  | 15             | 34966717  | 34966764  | 1  | TTTATTGATCAGTCACTGAGCTAATGTAATATCCTCATCAATAGG     | Homo sapiens           |
| 1352667 | scaffold    | scaffold_10    | 1659544   | 1659591   | -1 | TTTATTGATCAGTCACTGAGCTAATGTAATATCCTCATCAATAGG     | Takifugu rubripes      |
| 1352667 | group       | groupXV        | 9284240   | 9284287   | -1 | TTTATTGATCAGTCACTGAGCTAATGTAATATCCTCATCAATAGG     | Ciona intestinalis     |
| 1352667 | chromosome  | 22             | 6797747   | 6797794   | -1 | TTTATTGATCAGTCACTGAGCTAATGTAATATCCTCATCAATAGG     | Gasterosteus aculeatus |
| 1352667 | toplevel    | 17             | 50395912  | 50395958  | -1 | TTTATTGATCAGTCACTGAGCTAATGTAATATCCTCATCAATAGG     | Danio rerio            |
| 1352667 | chromosome  | 2              | 115685049 | 115685096 | 1  | TTTATTGATCAGTCACTGAGCTAATGTAATATCCTCATCAATAGG     | Mus musculus           |
| 1350900 | reflig      | reflig_148     | 446723    | 446764    | 1  | GGGTCATAATAAAGTTTACCCTTGGTGATGATATGTGGT           | Ciona savignyi         |
| 1350900 | chromosome  | 6              | 18663467  | 18663504  | -1 | GGGTTATTATACATTACCGATTCTAGTGATATGAAAT             | Canis familiaris       |
| 1350900 | chromosome  | 7              | 1243901   | 1243938   | 1  | GGGTTATTATACATTACCGATTCTAGTGATATGAAAT             | Homo sapiens           |
| 1350900 | scaffold    | scaffold_15    | 771201    | 771239    | 1  | GGGTTATAATACATTACCGATTCTAGTGATATGAAAT             | Takifugu rubripes      |
| 1350900 | chromosome  | 8q             | 3494121   | 3494162   | 1  | GAGTCATAATAAAGGTTTACCAGTTTGTATTGATGTTGAAAT        | Ciona intestinalis     |
| 1350900 | group       | groupXI        | 14178293  | 14178331  | 1  | GGGTTATAATACATTACCGATTCTAGTGATATGAAAT             | Gasterosteus aculeatus |
| 1350900 | chromosome  | 8              | 7499866   | 7499904   | -1 | GGGTTATAATACATTACCGATTCTAGTGATATGAAAT             | Oryzias latipes        |
| 1350900 | toplevel    | 3              | 41253493  | 41253530  | -1 | GGGTTATAATACATTACCGATTCTAGTGATATGAAAT             | Danio rerio            |
| 1350900 | chromosome  | 5              | 140024699 | 140024736 | 1  | GGGTTATTATACATTACCGATTCTAGTGATATGAAAT             | Mus musculus           |
| 1353951 | reflig      | reflig_27      | 1803648   | 1803692   | -1 | CAGAAAAAGTAAACGCCAAAGCATTCTTGGCCAAAGATCGAATTT     | Ciona savignyi         |
| 1353951 | chromosome  | 13             | 42020669  | 42020713  | 1  | CATCGAAAAGTCAACAAGATTAAAGCTTAAGTAGAGAAAAGAAATTT   | Canis familiaris       |
| 1353951 | chromosome  | 4              | 41571708  | 41571752  | 1  | CAATGAAAAGTCAACAAGAGTGTAGGCTTAATGAGATAAAGAAATTT   | Homo sapiens           |
| 1353951 | scaffold    | scaffold_70    | 397475    | 397519    | -1 | CAAGAAAAGTCAACAAGAGAGCAGTCTTGATGACAGAAGGAATTT     | Takifugu rubripes      |
| 1353951 | chromosome  | 1q             | 4864418   | 4864462   | -1 | CAGAAAAGTCAACAAGAGAGCAGTCTTGATGACAGAAGGAATTT      | Ciona intestinalis     |
| 1353951 | group       | groupIV        | 2909972   | 2910016   | -1 | CAAGAAAAGTCAACAAGAGAGCAGTCTTGATGACAGAAGGAATTT     | Gasterosteus aculeatus |
| 1353951 | ultracontig | ultracontig115 | 98148     | 98192     | 1  | CAAGAAAAGTCAACAAGAGAGTCTTGATGACAGAAGGAATTT        | Oryzias latipes        |
| 1353951 | toplevel    | 14             | 12551516  | 12551560  | 1  | CAAGAAAAGTCAACAAGAGAGCAGTCTTGATGACAGAAGGAATTT     | Danio rerio            |
| 1353951 | chromosome  | 5              | 67615300  | 67615340  | 1  | CAATGAAAAGTCAACAAGAGAGTGGCTTAAACAAAGAAATTT        | Mus musculus           |
| 1349883 | reflig      | reflig_0       | 2698402   | 2698447   | -1 | GATCGAAAAGGAAAATTCGTTTATTCTAATGACTCTGGAATTGTA     | Ciona savignyi         |
| 1349883 | chromosome  | 8              | 52260391  | 52260436  | 1  | GATTGAAAACACTCATCCGTGTAATCGGAATTTATTGGAATTAGA     | Canis familiaris       |
| 1349883 | chromosome  | 14             | 75807830  | 75807875  | 1  | GATTGAAAACACTCATCCGTGTAATCGGAATTTATTGGAATTAGA     | Homo sapiens           |
| 1349883 | scaffold    | scaffold_72    | 519125    | 519170    | 1  | GATTGAAAACACTCATCCGTGTAATCGGAATTTATTGGAATTAGA     | Takifugu rubripes      |
| 1349883 | chromosome  | 10p            | 1798580   | 1798625   | -1 | GATCGAAAAGGAAAATTCGTTTAACTTAATCTCTGGAATTGTA       | Ciona intestinalis     |
| 1349883 | group       | groupVIII      | 10446290  | 10446335  | -1 | GATTGAAAACACTCATCCGTGTAATCGGAATTTATTGGAATTAGA     | Gasterosteus aculeatus |
| 1349883 | chromosome  | 24             | 677170    | 677215    | 1  | GATTGAAAACACTCATCCGTGTAATCGGAATTTATTGGAATTAGA     | Oryzias latipes        |
| 1349883 | toplevel    | 17             | 48254281  | 48254325  | -1 | GATTGAAAACACTCATCCGTGTAATCGGAATTTATTGGAATTAGA     | Danio rerio            |

|         |             |                |           |           |    |                                                  |                        |
|---------|-------------|----------------|-----------|-----------|----|--------------------------------------------------|------------------------|
| 1349883 | chromosome  | 12             | 87672238  | 87672283  | 1  | GATTGAAAACCACTCCGTGTAATCGGAATTATTTGGAATTAGA      | Mus musculus           |
| 1351907 | reflig      | reflig_1       | 2387645   | 2387691   | -1 | ATTCTGCATCAAGTCCGGTGTGTAACACAGAGCAGCAATTAAGAGT   | Ciona savignyi         |
| 1351907 | chromosome  | 22             | 48663224  | 48663269  | 1  | ATTGCACATCCACACTGTGACATAAACAGAGTGGAAAAATTAAGATT  | Canis familiaris       |
| 1351907 | chromosome  | 13             | 94416939  | 94416984  | 1  | ATTGCACATCCACACTGTGACATAAACAGAGTGGAAAAATTAAGATT  | Homo sapiens           |
| 1351907 | scaffold    | scaffold_103   | 117053    | 117098    | -1 | ATTGCACATCCACACTGTGACATAAACAGAGTGGAAAAATTAAGATT  | Takifugu rubripes      |
| 1351907 | chromosome  | 3p             | 1213740   | 1213786   | -1 | ATTCTGCATCAAGTCCGGTGTGTAACACAGAGTGGAGCAATTAAGAGT | Ciona intestinalis     |
| 1351907 | group       | groupXVI       | 9268740   | 9268785   | 1  | ATTGCACATCCACACTGTGACATAAACAGAGTGGAAAAATTAAGATT  | Gasterosteus aculeatus |
| 1351907 | chromosome  | 21             | 25474807  | 25474852  | -1 | ATTGCACATCCACACTGTGACATAAACAGAGTGGAAAAATTAAGATT  | Oryzias latipes        |
| 1351907 | toplevel    | 14             | 2403042   | 2403087   | -1 | ATTGCACATCCACACTGTGACATAAACAGAGTGGAAAAATTAAGATT  | Danio rerio            |
| 1351907 | chromosome  | 14             | 118835167 | 118835212 | 1  | ATTGCACATCCACACTGTGACATAAACAGAGTGGAAAAATTAAGATT  | Mus musculus           |
| 1350090 | reflig      | reflig_375     | 81579     | 81626     | 1  | CCGCTGCCTGCACAGGGGGCTTTTGACGACGTGTAATTTCCAAGG    | Ciona savignyi         |
| 1350090 | chromosome  | 2              | 88119976  | 88120019  | 1  | CCATTTTGCCAAACACAGGGGCCAGGCAGCAGGTTACCAAGG       | Canis familiaris       |
| 1350090 | chromosome  | 1              | 10717211  | 10717254  | -1 | CCATTTTGCCAAACACAGGGGCCAGGCAGCAGGTTACCAAGG       | Homo sapiens           |
| 1350090 | scaffold    | scaffold_20    | 785376    | 785419    | 1  | CCATTTTGCCAAACACAGGGGCCAGGCAGCAGGTTACCAAGG       | Takifugu rubripes      |
| 1350090 | chromosome  | 4q             | 1832834   | 1832881   | -1 | CCATTTGCCTCGGCACAGGTGGCTTTTGACGACGTGTAATTTCCAAGG | Ciona intestinalis     |
| 1350090 | chromosome  | 7              | 9790304   | 9790347   | -1 | CCATTTTGCTGCGCAAGGGGCCCTGGAAGCAGGTTACCAAGG       | Oryzias latipes        |
| 1350090 | group       | groupXII       | 9306783   | 9306826   | -1 | CCATTTTGCCAGCACAAGGGGCCCTGGAAGCAGGTTACCAAGG      | Gasterosteus aculeatus |
| 1350090 | toplevel    | 23             | 25556274  | 25556317  | 1  | CCATTTTGCCAGCACAAGGGGCCCTGGAAGCAGGTTACCAAGG      | Danio rerio            |
| 1350090 | chromosome  | 4              | 148234876 | 148234919 | 1  | CCATTTTGCCAAACACAGGGGCCAGGCAGCAGGTTACCAAGG       | Mus musculus           |
| 1351583 | reflig      | reflig_24      | 364349    | 364388    | 1  | TTATTTTTATCTGTTGATCTATCAACAATAGTCTCCAAT          | Ciona savignyi         |
| 1351583 | chromosome  | 10             | 50380499  | 50380537  | 1  | AGTATTTTATCTTTTCCTTATTATAGTGATCTCCAAT            | Canis familiaris       |
| 1351583 | chromosome  | 2              | 44920749  | 44920787  | 1  | AGTATTTTATCTTTTCCTTATTATAGTGATCTCCAAT            | Homo sapiens           |
| 1351583 | scaffold    | scaffold_124   | 511717    | 511755    | -1 | ACTATTTTATCTTAAATGATAGAGTGATCTCCAAT              | Takifugu rubripes      |
| 1351583 | chromosome  | 8q             | 4454696   | 4454735   | 1  | ATATTTTTATCTGTTTACACATCAACAGTGATATCCCAAT         | Ciona intestinalis     |
| 1351583 | group       | groupVI        | 13565185  | 13565223  | 1  | ACTATTTTATCTTAAATGATAGAGTGATCTCCAAT              | Gasterosteus aculeatus |
| 1351583 | chromosome  | 15             | 15504687  | 15504725  | -1 | ACTATTTTATCTTAAATGATAGAGTGATCTCCAAT              | Oryzias latipes        |
| 1351583 | toplevel    | 13             | 6042957   | 6042993   | -1 | TATTTTATCTCTCAATGATAGAGTGATCTCCAAT               | Danio rerio            |
| 1351583 | chromosome  | 17             | 85926575  | 85926613  | 1  | AGTATTTTATCTTTTCCTTATTATAGTGATCTCCAAT            | Mus musculus           |
| 1351665 | reflig      | reflig_1       | 1196723   | 1196769   | 1  | TTTTTGTCATAAATTCCTGATTTGCAATTCCTCTTGCAATTTT      | Ciona savignyi         |
| 1351665 | chromosome  | 28             | 16329461  | 16329510  | 1  | ATTCAAACCTCATTACATCTTATTTTCAATTTGCTGCCACAGTAGTT  | Canis familiaris       |
| 1351665 | chromosome  | 10             | 102372570 | 102372619 | 1  | ATTCAAACCTCATTACATCTTATTTTCAATTTGCTGCCACAGTAGTT  | Homo sapiens           |
| 1351665 | scaffold    | scaffold_59    | 792972    | 793021    | 1  | ATTCAAGCTCATTATACCTTATTTTCAATTTGCTGCCACAGTAGTT   | Takifugu rubripes      |
| 1351665 | chromosome  | 3p             | 2011235   | 2011283   | -1 | ATTTTGACCTCATGATTTCCGGATTTGCAAACTCCTGCTGCAATTT   | Ciona intestinalis     |
| 1351665 | chromosome  | 19             | 10220108  | 10220157  | -1 | ATTCAAACCTCATTACATCTTATTTTCAATTTGCTGCCACAGTAGTT  | Oryzias latipes        |
| 1351665 | group       | groupV         | 979770    | 979819    | -1 | ATTCAAACCTCATTACATCTTATTTTCAATTTGCTGCCACAGTAGTT  | Gasterosteus aculeatus |
| 1351665 | toplevel    | 12             | 47408176  | 47408225  | -1 | ATTCAAACCTCATTGCTGCTTATTTTCAATTTGCTGCCACAGTAGTT  | Danio rerio            |
| 1351665 | chromosome  | 19             | 44715988  | 44716037  | 1  | ATTCAAACCTCATTACATCTTATTTTCAATTTGCTGCCACAGTAGTT  | Mus musculus           |
| 1353652 | reflig      | reflig_375     | 91986     | 92027     | -1 | ATAAATTTCTATCTTTCAGAATAAATAAGCACCCACAAA          | Ciona savignyi         |
| 1353652 | chromosome  | 14             | 46790545  | 46790585  | 1  | ACAATGAATTTTCAGCAGAATAAATAACTTAATTAACAAA         | Canis familiaris       |
| 1353652 | chromosome  | 7              | 31241094  | 31241134  | 1  | ACAATGAATTTTCAGCAGAATAAATAACTTAATTAACAAA         | Homo sapiens           |
| 1353652 | scaffold    | scaffold_80    | 807953    | 807993    | -1 | ACAATGAATTTTCAGCAGAATAAATAACTTAATTAACAAA         | Takifugu rubripes      |
| 1353652 | chromosome  | 4q             | 1822883   | 1822924   | 1  | ATAAATGAATTTTCAGCAGAATAAATAACTTAATTAACAAA        | Ciona intestinalis     |
| 1353652 | group       | groupIII       | 1309797   | 13098037  | -1 | ACAATGAATTTTCAGCAGAATAAATAACTTAATTAACAAA         | Gasterosteus aculeatus |
| 1353652 | chromosome  | 17             | 30337034  | 30337074  | 1  | ACAATGAATTTTCAGCAGAATAAATAACTTAATTAACAAA         | Oryzias latipes        |
| 1353652 | toplevel    | 24             | 30905730  | 30905770  | 1  | ACAATGAATTTTCAGCAGAATAAATAACTTAATTAACAAA         | Danio rerio            |
| 1353652 | chromosome  | 6              | 55529721  | 55529761  | 1  | ACAATGAATTTTCAGCAGAATAAATAACTTAATTAACAAA         | Mus musculus           |
| 1353683 | reflig      | reflig_259     | 407612    | 407657    | -1 | GTCGCCCGGGCTGAATGCTGCTTTGATGTTCCCGAATTCGACGGC    | Ciona savignyi         |
| 1353683 | chromosome  | 21             | 34974199  | 34974246  | 1  | ATTGCACAGTCTCAATAGTCTTTGCTTTGCTCTAATTGACAGC      | Canis familiaris       |
| 1353683 | chromosome  | 11             | 8261507   | 8261554   | 1  | ATTGCACAGTCTCAATAGTCTTTGCTTTGCTCTAATTGACAGC      | Homo sapiens           |
| 1353683 | scaffold    | scaffold_14    | 107600    | 107647    | 1  | ATTGCACAGTCTCAATAGTCTTTGCTTTGCTCTAATTGACAGC      | Takifugu rubripes      |
| 1353683 | chromosome  | 12q            | 2804056   | 2804099   | -1 | ATTGCCAGGGCAAAGTTTCTTGATCTGCGGAATCGACTGC         | Ciona intestinalis     |
| 1353683 | group       | groupII        | 9881047   | 9881094   | 1  | ATTGCACAGTCTCAATAGTCTTTGCTTTGCTCTAATTGACAGC      | Gasterosteus aculeatus |
| 1353683 | chromosome  | 3              | 18032063  | 18032110  | 1  | ATTGCACAGTCTCAATAGTCTTTGCTTTGCTCTAATTGACAGC      | Oryzias latipes        |
| 1353683 | toplevel    | 7              | 23643799  | 23643845  | -1 | ATTGCACAGTCTCAATAGTCTTTGCTTTGCTCTAATTGACAGC      | Danio rerio            |
| 1353683 | chromosome  | 7              | 116335112 | 116335159 | 1  | ATTGCACAGTCTCAATAGTCTTTGCTTTGCTCTAATTGACAGC      | Mus musculus           |
| 1353915 | reflig      | reflig_27      | 1802771   | 1802815   | 1  | AATTGAAAATTAATGAGTGGGCTCTGAACGTTTCCTTTACATTT     | Ciona savignyi         |
| 1353915 | chromosome  | 30             | 34700101  | 34700144  | -1 | ATTTGACATTTCAATAAGTGAACACAGCATTACAATCCATCT       | Canis familiaris       |
| 1353915 | chromosome  | 15             | 65665355  | 65665398  | -1 | ATTTGACATTTCAATAAGTGAACACAGCATTACAATCCATCT       | Homo sapiens           |
| 1353915 | scaffold    | scaffold_1     | 3461808   | 3461851   | 1  | AATTGACATTTCAATAAGTGAACACAGCATTACAATCCATCT       | Takifugu rubripes      |
| 1353915 | chromosome  | 1q             | 4863534   | 4863576   | 1  | AATTGAAAATTAATGAGTGGCCGAGCCTTTCCACCTTATTT        | Ciona intestinalis     |
| 1353915 | chromosome  | 3              | 11104228  | 11104271  | 1  | AATTGACATTTCAATAAGTGAACACAGCCTTTCCACCTTATTT      | Oryzias latipes        |
| 1353915 | group       | groupII        | 18639805  | 18639848  | -1 | AATTGACATTTCAATAAGTGAACACAGCCTTTCCACCTTATTT      | Gasterosteus aculeatus |
| 1353915 | toplevel    | 18             | 14268076  | 14268117  | 1  | AATTGACATTTCAATAAGTGAACACAGCCTTTCCACCTTATTT      | Danio rerio            |
| 1353915 | chromosome  | 9              | 63186812  | 63186855  | 1  | ATTTGACATTTCAATAAGTGAACACAGCATTACAATCCATCT       | Mus musculus           |
| 1350687 | reflig      | reflig_580     | 213431    | 213474    | 1  | GAGTTTTAATTAAGTATAATACGATTAGGTCATCGATCAAT        | Ciona savignyi         |
| 1350687 | chromosome  | 1              | 123753186 | 123753234 | 1  | GATTTTTAGTTAGATTCAAATAGATGTTAATGTTGCTGATAAAT     | Canis familiaris       |
| 1350687 | chromosome  | 19             | 36045557  | 36045605  | -1 | GATTTTTAGTTAGATTCAAATAGATGTTAATGTTGCTGATAAAT     | Homo sapiens           |
| 1350687 | scaffold    | scaffold_133   | 376640    | 376688    | -1 | GATTTTTAGTTAGATTCAAATAGATGTTAATGTTGCTGATAAAT     | Takifugu rubripes      |
| 1350687 | chromosome  | 1q             | 4642013   | 4642056   | -1 | GAATTTTGTAGTCTAATGATGCGAATTTGCTCTCGATCAAT        | Ciona intestinalis     |
| 1350687 | group       | groupXX        | 4561280   | 4561328   | -1 | GATTTTTAGTTAGATTCAAATAGATGTTAATGTTGCTGATAAAT     | Gasterosteus aculeatus |
| 1350687 | ultracontig | ultracontig182 | 2340477   | 2340525   | -1 | GATTTTTAGTTAGATTCAAATAGATGTTAATGTTGCTGATAAAT     | Oryzias latipes        |
| 1350687 | toplevel    | 19             | 12450009  | 12450057  | 1  | GATTTTTAGTTAGATTCAAATAGATGTTAATGTTGCTGATAAAT     | Danio rerio            |
| 1350687 | chromosome  | 7              | 37945231  | 37945279  | 1  | GATTTTTAGTTAGATTCAAATAGATGTTAATGTTGCTGATAAAT     | Mus musculus           |
| 1350370 | reflig      | reflig_90      | 316408    | 316448    | -1 | GCTAATTTATGCTAATGCTTAATTTCTCGATTAGATTG           | Ciona savignyi         |
| 1350370 | chromosome  | X              | 70267567  | 70267607  | 1  | GCTAATTTATGTGAGCTTTAAGACTGTTGGGATTAGATT          | Canis familiaris       |
| 1350370 | chromosome  | X              | 85626159  | 85626199  | 1  | GCTAATTTATGTGAGCTTTAAGAAATGTTGGATTAGATT          | Homo sapiens           |
| 1350370 | scaffold    | scaffold_31    | 409134    | 409174    | 1  | GCTAATTTATGTGAGCTTTAAGAAATGTTGGATTAGATT          | Takifugu rubripes      |
| 1350370 | chromosome  | 4q             | 5687507   | 5687547   | -1 | GCTAATTTATGTGAGCTTTAAGAAATGTTGGATTAGATT          | Ciona intestinalis     |
| 1350370 | chromosome  | 21             | 9488006   | 9488046   | -1 | GCTAATTTATGTGAGCTTTAAGAAATGTTGGATTAGATT          | Oryzias latipes        |
| 1350370 | group       | groupXVI       | 2722511   | 2722551   | 1  | GCTAATTTATGTGAGCTTTAAGAAATGTTGGATTAGATT          | Gasterosteus aculeatus |
| 1350370 | toplevel    | 9              | 24892408  | 24892448  | 1  | GCTAATTTATGTGAGCTTTAAGAAATGTTGGATTAGATT          | Danio rerio            |
| 1350370 | chromosome  | X              | 110636058 | 110636098 | 1  | GCTAATTTATGTGAGCTTTAAGAAATGTTGGATTAGATT          | Mus musculus           |
| 1349849 | reflig      | reflig_19      | 3140779   | 3140828   | 1  | TCTTGCGCGATATAAATGCGGCTTAAATTTTCTTAACTGCAAAA     | Ciona savignyi         |
| 1349849 | chromosome  | 18             | 13326157  | 13326206  | 1  | TTTCTCCTGTTTTTCATTTAATCGGTGTGACTATTCTGCTGGCAGGT  | Canis familiaris       |
| 1349849 | chromosome  | 7              | 39359972  | 39360021  | -1 | TTTCTCCTGTTTTTCATTTAATCGGTGTGACTATTCTGCTGGCAGGT  | Homo sapiens           |
| 1349849 | scaffold    | scaffold_223   | 244915    | 244964    | -1 | TTTCTCCTGTTTTTCATTTAATCGCGGGACTATTCTGCTGGCAGGT   | Takifugu rubripes      |
| 1349849 | chromosome  | 2q             | 1833045   | 1833094   | -1 | TTTCTCAGTTTTGGAATAAATAGGCGCAGATTATGCGCCGCGAGAT   | Ciona intestinalis     |
| 1349849 | group       | groupXXI       | 9778725   | 9778774   | -1 | TTTCTCCTGTTTTTCATTTAATCGCGCGACCATCTGCTGTGGCAGGT  | Gasterosteus aculeatus |
| 1349849 | chromosome  | 20             | 19212563  | 19212612  | -1 | TTTCTCCTGTTTTTCATTTAATCGCGCGACCATCTGCTGTGGCAGGT  | Oryzias latipes        |
| 1349849 | toplevel    | 24             | 9476692   | 9476741   | 1  | TTTCTCCTGTTTTTCATTTAATCGCTGTGACCATCTGCTGTGGCAGGT | Danio rerio            |

|         |             |                |           |           |    |                                                   |                        |
|---------|-------------|----------------|-----------|-----------|----|---------------------------------------------------|------------------------|
| 1349849 | chromosome  | 13             | 18310820  | 18310869  | 1  | TTTCTCCTGTTTTTCATTTTAACTCGGTGACTATTCTGCTGTGGCGGGT | Mus musculus           |
| 1350222 | reflig      | reflig_133     | 349672    | 349714    | 1  | GCCAAGCCTAGGTTGATTTGATATTGGAGTATAATAGTT           | Ciona savignyi         |
| 1350222 | chromosome  | 6              | 18663393  | 18663433  | -1 | GAAAAGCTGGGGTGTCAAATTTGAAATGGAGAATAATAGCC         | Canis familiaris       |
| 1350222 | chromosome  | 7              | 1243972   | 1244012   | 1  | GAAAAGCTGGGGTGTCAAATTTGAAATGGAGAATAATAGCC         | Homo sapiens           |
| 1350222 | scaffold    | scaffold_15    | 771273    | 771314    | 1  | GAAAAGCTGGGGTGTCAAATTTGAAATGGAGAATAATAGCC         | Takifugu rubripes      |
| 1350222 | chromosome  | 5q             | 1236057   | 1236099   | -1 | GCAAAGGCATAAGTTGATTTGATATCGGTTGATATAATGGCC        | Ciona intestinalis     |
| 1350222 | group       | groupXI        | 14178365  | 14178406  | 1  | GAAAAGCTGGGGTGTCAAATTTGAAATGGAGAATAATAGCC         | Gasterosteus aculeatus |
| 1350222 | chromosome  | 8              | 7499791   | 7499832   | -1 | GAAAAGCTGGGGTGTCAAATTTGAAATGGAGAATAATAGCC         | Oryzias latipes        |
| 1350222 | toplevel    | 3              | 41253419  | 41253458  | -1 | AAAGGCTGGGGTGTCAAATTTGAAATGGAGAATAATAGCC          | Danio rerio            |
| 1350222 | chromosome  | 5              | 140024770 | 140024810 | 1  | GAAAAGCTGGGGTGTCAAATTTGAAATGGAGAATAATAGCC         | Mus musculus           |
| 1350314 | reflig      | reflig_31      | 374336    | 374377    | -1 | TTGATTAAGAATTGATTGACGGCTCAGCAGATAAATGGCT          | Ciona savignyi         |
| 1350314 | chromosome  | 4              | 29321316  | 29321354  | 1  | GTAATTATAATTTGATAAATCATCAGCAGAAAATTAAC            | Canis familiaris       |
| 1350314 | chromosome  | 10             | 77397326  | 77397364  | 1  | GTAATTATAATTTGATAAATCATCAGCAGAAAATTAAC            | Homo sapiens           |
| 1350314 | scaffold    | scaffold_59    | 1337773   | 1337811   | 1  | GTAATTATAATTTGATAAATCATCAGCAGAAAATTAAC            | Takifugu rubripes      |
| 1350314 | chromosome  | 3q             | 2932302   | 2932343   | -1 | GTGATTAAGGTTGATTGACATCTCAACAGATAAATAGCT           | Ciona intestinalis     |
| 1350314 | chromosome  | 19             | 9344914   | 9344952   | -1 | GTAATTATAATTTGATAAATCATCAGCAGAAAATTAAC            | Oryzias latipes        |
| 1350314 | group       | groupV         | 393506    | 393544    | -1 | GTAATTATAATTTGATAAATCATCAGCAGAAAATTAAC            | Gasterosteus aculeatus |
| 1350314 | toplevel    | 13             | 15338535  | 15338573  | 1  | GTAATTATAATTTGATAAATCATCAGCAGAAAATTAAC            | Danio rerio            |
| 1350314 | chromosome  | 14             | 23325043  | 23325081  | 1  | GTAATTATAATTTGATAAATCATCAGCAGAAAATTAAC            | Mus musculus           |
| 1352987 | reflig      | reflig_91      | 147150    | 147194    | -1 | CCAGAGCAGGATTTGATTGAACGGGTCGATTTATGTTGTAAGTA      | Ciona savignyi         |
| 1352987 | chromosome  | 3              | 17590802  | 17590845  | 1  | CCAAGCCTCACITTAATGAACTGAAGCATATGTTGCAAGTA         | Canis familiaris       |
| 1352987 | chromosome  | 5              | 94138005  | 94138048  | -1 | CCAAGCCTCACITTAATGAACTGAAGCATATGTTGCAAGTA         | Homo sapiens           |
| 1352987 | scaffold    | scaffold_101   | 343508    | 343551    | 1  | CCAAGCCTCACITTAATGAACTGAAGCATATGTTGCAAGTA         | Takifugu rubripes      |
| 1352987 | chromosome  | 5q             | 6150478   | 6150523   | -1 | CCAGACAAGATTTGATTGAACCTAGTTCGAAATGTTGTAGGTA       | Ciona intestinalis     |
| 1352987 | group       | groupXIII      | 11281361  | 11281404  | -1 | CCAAGCCTCACITTAATGAACTGAAGCATATGTTGCAAGTA         | Gasterosteus aculeatus |
| 1352987 | chromosome  | 9              | 15738347  | 15738390  | -1 | CCAAGCCTCACITTAATGAACTGAAGCATATGTTGCAAGTA         | Oryzias latipes        |
| 1352987 | toplevel    | 5              | 45981863  | 45981906  | 1  | CCAAGCCTCACITTAATGAACTGAAGCATATGTTGCAAGTA         | Danio rerio            |
| 1352987 | chromosome  | 13             | 77067375  | 77067418  | 1  | CCAAGCCTCACITTAATGAACTGAAGCATATGTTGCAAGTA         | Mus musculus           |
| 1349989 | reflig      | reflig_148     | 461498    | 461537    | -1 | TTTGTTGTGCATAATTACTTGTTTGGTTGTAGTCTGT             | Ciona savignyi         |
| 1349989 | chromosome  | 36             | 22568348  | 22568388  | 1  | CTTATGCAGTAATAAATCACTCCATTACATTACTTTGTGT          | Canis familiaris       |
| 1349989 | chromosome  | 2              | 176259821 | 176259861 | 1  | CTTATGCAGTAATAAATCACTCCATTACATTACTTTGTGT          | Homo sapiens           |
| 1349989 | scaffold    | scaffold_100   | 413222    | 413262    | -1 | CTTATGCAGTAATAAATCACTCCATTACATTACTTTGTGT          | Takifugu rubripes      |
| 1349989 | chromosome  | 8q             | 3507310   | 3507349   | -1 | CTTGTTGTGCATAATTACTTGTTTGGTTGTTGTGT               | Ciona intestinalis     |
| 1349989 | group       | groupXVI       | 9873792   | 9873832   | -1 | CTTATGCAGTAATAAATCACTCCATTACATTACTTTGTGT          | Gasterosteus aculeatus |
| 1349989 | chromosome  | 21             | 24507872  | 24507912  | 1  | CTTGTTGTGCATAATAAATCACTCCATTACATTACTTTGTGT        | Oryzias latipes        |
| 1349989 | toplevel    | 9              | 2108411   | 2108451   | -1 | CTTATGCAGTAATAAATCACTCCATTACATTACTTTGTGT          | Danio rerio            |
| 1349989 | chromosome  | 2              | 74135162  | 74135202  | 1  | CTTATGCAGTAATAAATCACTCCATTACATTACTTTGTGT          | Mus musculus           |
| 1352080 | reflig      | reflig_17      | 1366966   | 1367004   | 1  | AGCAACCCACATTCAGAAATCTTTCGCACTTAAGTGA             | Ciona savignyi         |
| 1352080 | chromosome  | 23             | 45494110  | 45494150  | -1 | AGCAAAATCTCATTAAGTGCAATTCACAGACTCTGCTGA           | Canis familiaris       |
| 1352080 | chromosome  | 3              | 148513548 | 148513588 | -1 | AGCAAAATCTCATTAAGTGCAATTCACAGACTCTGCTGA           | Homo sapiens           |
| 1352080 | scaffold    | scaffold_142   | 265798    | 265838    | 1  | AGCAAAATCTCATTAAGTGCAATTCACAGACTCTGCTGA           | Takifugu rubripes      |
| 1352080 | chromosome  | 2q             | 5572259   | 5572299   | 1  | AGCAACGACGACTCAAGCAGAATCTACAGACTCTGCTGA           | Ciona intestinalis     |
| 1352080 | chromosome  | 20             | 16798789  | 16798829  | 1  | AGCAAAATCTCATTAAGTGCAATTCACAGACTCTGCTGA           | Oryzias latipes        |
| 1352080 | group       | groupXXI       | 8395986   | 8396026   | 1  | AGCAAAATCTCATTAAGTGCAATTCACAGACTCTGCTGA           | Gasterosteus aculeatus |
| 1352080 | toplevel    | 24             | 4339808   | 4339848   | 1  | AGCAAAATCTCATTAAGTGCAATTCACAGACTCTGCTGA           | Danio rerio            |
| 1352080 | chromosome  | 9              | 91358069  | 91358109  | 1  | AGCAAAATCTCATTAAGTGCAATTCACAGACTCTGCTGA           | Mus musculus           |
| 1352117 | reflig      | reflig_172     | 255102    | 255144    | 1  | TAATTTATTTGATTGAGGCTCAAAACTTATCACGTTTTCA          | Ciona savignyi         |
| 1352117 | chromosome  | 21             | 34974166  | 34974206  | 1  | CAATTAGTTAATATCAAAACAGCTAATTAATAATGCACA           | Canis familiaris       |
| 1352117 | chromosome  | 11             | 8261474   | 8261514   | 1  | CAATTAGTTAATATCAAAACAGCTAATTAATAATGCACA           | Homo sapiens           |
| 1352117 | scaffold    | scaffold_14    | 107567    | 107607    | 1  | CAATTAGTTAATATCAAAACAGCTAATTAATAATGCACA           | Takifugu rubripes      |
| 1352117 | chromosome  | 8q             | 3267484   | 3267526   | -1 | CAATTATTTGATTGAGTTCAAACAGCAATCAGATTTCA            | Ciona intestinalis     |
| 1352117 | group       | groupII        | 9881014   | 9881054   | 1  | CAATTAGTTAATATCAAAACAGCTAATTAATAATGCACA           | Gasterosteus aculeatus |
| 1352117 | chromosome  | 3              | 18032030  | 18032070  | 1  | CAATTAGTTAATATCAAAACAGCTAATTAATAATGCACA           | Oryzias latipes        |
| 1352117 | toplevel    | 7              | 23643838  | 23643878  | -1 | CAATTAGTTAATATCAAAACAGCTAATTAATAATGCACA           | Danio rerio            |
| 1352117 | chromosome  | 7              | 116335079 | 116335119 | 1  | CAATTAGTTAATATCAAAACAGCTAATTAATAATGCACA           | Mus musculus           |
| 1351439 | reflig      | reflig_494     | 5165      | 5202      | -1 | TTAATGACGCATAATGGAAGGTAGTTATTTAGCAATC             | Ciona savignyi         |
| 1351439 | chromosome  | 30             | 7552725   | 7552764   | 1  | TTAATTTGTCATTGCAAAAATCATTACTTTTAACAGCT            | Canis familiaris       |
| 1351439 | chromosome  | 15             | 35117121  | 35117160  | 1  | TTAATTTGTCATTGCAAAAATCATTACTTTTAACAGCT            | Homo sapiens           |
| 1351439 | scaffold    | scaffold_10    | 1616208   | 1616247   | -1 | TTAATTTGTCATTGCAAAAATGATTACTTTTAACAGCT            | Takifugu rubripes      |
| 1351439 | scaffold    | scaffold_114   | 344539    | 344579    | 1  | TTGATGACGCATAATGAAATTAATCAACTCTAACAACT            | Ciona intestinalis     |
| 1351439 | group       | groupXV        | 9331632   | 9331671   | 1  | TTAATTTGTCATTGCAAAAATGATTACTTTTAACAGCT            | Gasterosteus aculeatus |
| 1351439 | chromosome  | 22             | 6750152   | 6750191   | -1 | TTAATTTGTCATTGCAAAAATGATTACTTTTAACAGCT            | Oryzias latipes        |
| 1351439 | toplevel    | 17             | 50336266  | 50336305  | -1 | TTAATTTGTCATTGCAAAAATGATTACTTTTAACAGCT            | Danio rerio            |
| 1351439 | chromosome  | 2              | 115826708 | 115826747 | 1  | TTAATTTGTCATTGCAAAAATCATTACTTTTAACAGCT            | Mus musculus           |
| 1351073 | reflig      | reflig_19      | 4761693   | 4761738   | 1  | TTGTTCAATGAAATCGAAATGAGCTCTGAATATTTTAAAAACATTA    | Ciona savignyi         |
| 1351073 | chromosome  | 1              | 4582421   | 4582463   | 1  | ATGTTAATGAAGTGAATGATCTAATATTTTTGAAAAGAATA         | Canis familiaris       |
| 1351073 | chromosome  | 18             | 74619304  | 74619346  | -1 | ATGTTAATGAAGTGAATGATCTAATATTTTTGAAAAGAATA         | Homo sapiens           |
| 1351073 | scaffold    | scaffold_133   | 139018    | 139062    | -1 | TCGTTAATGAGGTGTAATGATCTCAATATTTTTGAAAAGATA        | Takifugu rubripes      |
| 1351073 | chromosome  | 2q             | 2586260   | 2586305   | 1  | TTGTTCAATGAAATCGAAATGAGCTCTGAATATTTTAAAAACATTA    | Ciona intestinalis     |
| 1351073 | group       | groupXX        | 4252188   | 4252231   | -1 | TCGTTAATGAGGTGTAATGATCTCAATATTTTTGAAAAGATA        | Gasterosteus aculeatus |
| 1351073 | ultracontig | ultracontig182 | 1590694   | 1590737   | -1 | TTGTTAATGAGGTGTAATGATCTCAATATTTTTGAAAAGATA        | Oryzias latipes        |
| 1351073 | toplevel    | 16             | 2498538   | 2498577   | 1  | GTTAATGAGGTGTAATGATCTCAATATTTTTGAAAAGATA          | Danio rerio            |
| 1351073 | chromosome  | 18             | 81328711  | 81328753  | 1  | ATGTTAATGAAGTGAATGATCTAATATTTTTGAAAAGAACA         | Mus musculus           |
| 1352042 | reflig      | reflig_72      | 965002    | 965046    | 1  | AACATAATCTTGTCAGTTTATTGTCAAAAGACAGTCTGTTATCG      | Ciona savignyi         |
| 1352042 | chromosome  | 28             | 35638959  | 35638999  | 1  | AAAAATTTATCGGCTTTGATTCTCAATATACGCTGTTTATG         | Canis familiaris       |
| 1352042 | chromosome  | 10             | 124842609 | 124842649 | 1  | AAAAATTTATCGGCTTTGATTCTCAATATACGCTGTTTATG         | Homo sapiens           |
| 1352042 | scaffold    | scaffold_76    | 12770     | 12810     | 1  | AAAAATTTATCGGCTTTGATTCTCAATATACGCTGTTTATG         | Takifugu rubripes      |
| 1352042 | scaffold    | scaffold_121   | 228934    | 228976    | -1 | AAAAATTTATCGGCTTTGATTCTCAATATACGCTGTTTATG         | Ciona intestinalis     |
| 1352042 | group       | groupVI        | 11858385  | 11858425  | -1 | AAAAATTTATCGGCTTTGATTCTCAATATACGCTGTTTATG         | Gasterosteus aculeatus |
| 1352042 | chromosome  | 15             | 18106367  | 18106407  | 1  | AAAAATTTATCGGCTTTGATTCTCAATATATGTTTATG            | Oryzias latipes        |
| 1352042 | toplevel    | 17             | 23310504  | 23310544  | 1  | AAAAATTTATCGGCTTTGATTCTCAATATAGGTTTATG            | Danio rerio            |
| 1352042 | chromosome  | 7              | 138640978 | 138641018 | 1  | AAAAATTTATCGGCTTTGATTCTCAATATACGCTGTTTATG         | Mus musculus           |
| 1352802 | reflig      | reflig_48      | 2431465   | 2431503   | 1  | TTGCGCAATTTAATTAATTCAGCGCATAAAAAAGAT              | Ciona savignyi         |
| 1352802 | chromosome  | 21             | 34957754  | 34957793  | 1  | TTCCCCCTTTGAATCAATATTCAATACACAAACATAAT            | Canis familiaris       |
| 1352802 | chromosome  | 11             | 8246991   | 8247032   | 1  | TTCCCCCTTTGAATCAATATTCAATACACAAACATAAT            | Homo sapiens           |
| 1352802 | scaffold    | scaffold_14    | 103728    | 103769    | 1  | TTCCCCCTTTGAATCAATATTCAATACACAAACATAAT            | Takifugu rubripes      |
| 1352802 | chromosome  | 5q             | 5027323   | 5027365   | -1 | TTCTCTCTATGACATCAATATTTACGGCCATAAAAATAAT          | Ciona intestinalis     |
| 1352802 | group       | groupIII       | 9877679   | 9877720   | 1  | TTCCCCCTTTGAATCAATATTCAATACACAAACATAAT            | Gasterosteus aculeatus |
| 1352802 | chromosome  | 3              | 18029164  | 18029205  | 1  | TTCCCCCTTTGAATCAATATTCAATACACAAACATAAT            | Oryzias latipes        |
| 1352802 | toplevel    | 7              | 23649370  | 23649411  | -1 | TTCCCCCTTTGAATCAATATTCAATACACAAACATAAT            | Danio rerio            |

|         |            |                  |           |           |    |                                                           |                        |
|---------|------------|------------------|-----------|-----------|----|-----------------------------------------------------------|------------------------|
| 1352802 | chromosome | 7                | 116318944 | 116318984 | 1  | TTCCCCCCTTTAGTAACATTTTCAATACACAAACATAAT                   | Mus musculus           |
| 1351047 | reflig     | reftig_14        | 422323    | 422362    | -1 | GCTGCTAAATTTAGTGCCGAAGCTGGTTTTTATTTAGTT                   | Ciona savignyi         |
| 1351047 | chromosome | 1                | 123753161 | 123753201 | 1  | ACTAACAAATTTGGTAATGAAATATTGATTTTAGTTAGATT                 | Canis familiaris       |
| 1351047 | chromosome | 19               | 36045590  | 36045630  | -1 | ACTAACAAATTTGGTAATGAAATATTGATTTTAGTTAGATT                 | Homo sapiens           |
| 1351047 | scaffold   | scaffold_117     | 638285    | 638325    | 1  | GCTAACAAATTTGGTAATGAAATATTGATTTTAGTTAGATT                 | Takifugu rubripes      |
| 1351047 | chromosome | 1q               | 3459594   | 3459633   | -1 | GCCGTGCAATTAGTAGCGAAATTTACTTTTTATTTAGTT                   | Ciona intestinalis     |
| 1351047 | chromosome | 3                | 35751767  | 35751807  | 1  | GCTAACAAATTTGGTAATGAAATATTGATTTTAGTTAGATT                 | Oryzias latipes        |
| 1351047 | group      | groupI           | 1481133   | 1481173   | -1 | TCTAACAAATTTGGTAATGAAATATTGATTTTAGTTAGATT                 | Gasterosteus aculeatus |
| 1351047 | toplevel   | 7                | 42643807  | 42643846  | 1  | CTAACAAATTTGGTAATGAAATATTGATTTTAGTTAGATT                  | Danio rerio            |
| 1351047 | chromosome | 7                | 37945206  | 37945246  | 1  | ACTAACAAATTTGGTAATGAAATATTGATTTTAGTTAGATT                 | Mus musculus           |
| 1349625 | reflig     | reftig_19        | 1629510   | 1629551   | -1 | TCAGAGATGGGCTTTTATGAAGTTTAAATGAGCCAATATA                  | Ciona savignyi         |
| 1349625 | chromosome | 6                | 60906088  | 60906126  | -1 | TCGTTGATGGAGTTGATTAAGTTTAAATGAAGCAGACAC                   | Canis familiaris       |
| 1349625 | chromosome | 1                | 91079158  | 91079196  | 1  | TCATTGATGGAGTTGATTAAGTTTAAATGAAGCAGACAC                   | Homo sapiens           |
| 1349625 | scaffold   | scaffold_67      | 1184743   | 1184781   | 1  | TCATTGATGGAGTTGATTAAGTTTAAATGAAGCAGACAC                   | Takifugu rubripes      |
| 1349625 | scaffold   | scaffold_165     | 47943     | 47984     | -1 | TCACAGATGGGATTTTATGAATTTTAAACGAGCCAATCAC                  | Ciona intestinalis     |
| 1349625 | group      | groupVIII        | 2550902   | 2550940   | -1 | TCATTGATGGAGTTGATTAAGTTTAAATGAAGCAGACGC                   | Gasterosteus aculeatus |
| 1349625 | chromosome | 4                | 5609607   | 5609645   | 1  | TCATTGATGGAGTTGATTAAGTTTAAATGAAGCAGACAG                   | Oryzias latipes        |
| 1349625 | toplevel   | 6                | 48829858  | 48829896  | -1 | TCATTGATGGAGTTGATTAAGTTTAAATGAAGCAGACAC                   | Danio rerio            |
| 1349625 | chromosome | 5                | 106994360 | 106994398 | 1  | TCATTGATGGAGTTGATTAAGTTTAAATGAAGCAGACAC                   | Mus musculus           |
| 1349996 | reflig     | reftig_55        | 822869    | 822912    | -1 | ATCAATAATGCAATGCAAATTTAAGCGGACACAGTTTAAAGTAA              | Ciona savignyi         |
| 1349996 | chromosome | 18               | 13452294  | 13452332  | 1  | ACTAACATTACAACATCATGCAGAACACAGATAAATGTAA                  | Canis familiaris       |
| 1349996 | chromosome | 7                | 39232349  | 39232387  | -1 | ACTAACATTACAACATCATGCAGAACACAGATAAATGTAA                  | Homo sapiens           |
| 1349996 | scaffold   | scaffold_223     | 235744    | 235782    | -1 | ATTAACATTACAATCAAGCAGAACACAGATAAATGTAA                    | Takifugu rubripes      |
| 1349996 | chromosome | 9q               | 511359    | 511401    | -1 | ATTAATAATGCAAGTCAAATTTGAGGACACAGTTTAAAGTAA                | Ciona intestinalis     |
| 1349996 | group      | groupXXI         | 9768230   | 9768268   | -1 | ATTAACATTACAACATCATGCAGAACACAGATAAATGTAA                  | Gasterosteus aculeatus |
| 1349996 | chromosome | 20               | 19199713  | 19199751  | -1 | ATTAACATTACAACATCATGCAGAACACAGATAAATGTAA                  | Oryzias latipes        |
| 1349996 | toplevel   | 24               | 9569199   | 9569237   | 1  | ATTAGCATTACGAGTATGCAGAACCCAGATAAATGTAA                    | Danio rerio            |
| 1349996 | chromosome | 13               | 18439340  | 18439378  | 1  | ACTAACATTACAACATCATGCAGAACACAGATAAATGTAA                  | Mus musculus           |
| 1350575 | reflig     | reftig_24        | 407659    | 407705    | 1  | ATTAGCGTGGGATCAAGCCCGCAATTCCTGCTCACCGCAACC                | Ciona savignyi         |
| 1350575 | chromosome | 14               | 46790585  | 46790631  | 1  | ATTTGCATGCATATTCATCAGGCTATTGAAGTCTTCCAGCCAGCT             | Canis familiaris       |
| 1350575 | chromosome | 7                | 31241134  | 31241180  | 1  | ATTTGCATGCATATTCATCAGGCTATTGAAGTCTTCCAGCCAGCT             | Homo sapiens           |
| 1350575 | scaffold   | scaffold_15      | 1667399   | 1667445   | 1  | ATTTGCATGCATATTCATCAGGCTATTGAAGTCTTCCAGCCAGCT             | Takifugu rubripes      |
| 1350575 | chromosome | 8q               | 4493614   | 4493660   | 1  | ATTAGCGTGGGATCAAGCCCGCAATTCCTGCTCACCGCACGGCT              | Ciona intestinalis     |
| 1350575 | group      | groupXI          | 6132226   | 6132272   | 1  | ATTCACATGCATATTCATCAGCCTAATTAAGTCTGCTCCGCGTCT             | Gasterosteus aculeatus |
| 1350575 | chromosome | 8                | 5817555   | 5817601   | -1 | ATTCACATGCATATTCATCAGCCTAATTAAGTCTGCTCCGCGTCT             | Oryzias latipes        |
| 1350575 | toplevel   | 24               | 30905770  | 30905807  | 1  | ATTTGCATGCATATTCATCAGGCTATTGAAGTCTTCCAGCCAGCT             | Danio rerio            |
| 1350575 | chromosome | 6                | 55529761  | 55529807  | 1  | ATTTGCATGCATATTCATCAGGCTATTGAAGTCTTCCAGCCAGCT             | Mus musculus           |
| 1350679 | reflig     | reftig_140       | 609591    | 609630    | -1 | TAATTTCCGATTTAAACGAATCATCCCATCAAGCCCTTT                   | Ciona savignyi         |
| 1350679 | chromosome | 36               | 21299393  | 21299434  | 1  | TCATTTACAGTTTGAAGTATGCTCCATAGCAACTCCCT                    | Canis familiaris       |
| 1350679 | chromosome | 2                | 174750093 | 174750134 | 1  | TCATTTACAGTTTGAAGTATGCTCCATAGCAACTCCCT                    | Homo sapiens           |
| 1350679 | scaffold   | scaffold_100     | 537775    | 537816    | -1 | TCATTTACAGTTTGAAGTATGCTCCATAGCAACTCCCT                    | Takifugu rubripes      |
| 1350679 | chromosome | 9q               | 2662432   | 2662474   | -1 | TAATTTCCGATTTAAAGCGACATCATTCTATCAAGGCCCTT                 | Ciona intestinalis     |
| 1350679 | group      | groupXVI         | 10015821  | 10015862  | -1 | TCATTTCCGATTTGAAGCGAGATCCCATAGCAACTCCCT                   | Gasterosteus aculeatus |
| 1350679 | chromosome | 21               | 24314955  | 24314997  | 1  | TCATTTCCGATTTGAAGCGAGATCCCATAGCAACTCCCT                   | Oryzias latipes        |
| 1350679 | toplevel   | Zv7_scaffold2619 | 45874     | 45915     | -1 | TCGTTTCCGCTTTGAAGCAGATCTCCATAGCAACTCTCT                   | Danio rerio            |
| 1350679 | chromosome | 2                | 73018245  | 73018286  | 1  | TCATTTACAGTTTGAAGCAGATCCCATAGCAACTCCCT                    | Mus musculus           |
| 1351070 | reflig     | reftig_19        | 4761705   | 4761753   | 1  | TCGAAATGAGCTCGAATATTTTATAAAACATTAGCTCGATAAAATATT          | Ciona savignyi         |
| 1351070 | chromosome | 28               | 26579682  | 26579731  | 1  | TCTAAAGAAGTGGGTATCATTTCATATAGCCCTGGCAGAGCAGATCATT         | Canis familiaris       |
| 1351070 | chromosome | 10               | 114280545 | 114280594 | 1  | TCTAAAGAAGTGGGTATCATTTCATATAGCCCTGGCAGAGCAGATCATT         | Homo sapiens           |
| 1351070 | scaffold   | scaffold_29      | 1606286   | 1606335   | -1 | TCTAAAGAAGTGGGTATCATTTCATATAGCCCTGGCAGAGCAGATCATT         | Takifugu rubripes      |
| 1351070 | chromosome | 2q               | 2586272   | 2586320   | 1  | TCGAAATGAGCTCGAATATTTTATAAAACATTAGCTCGATAAAATATT          | Ciona intestinalis     |
| 1351070 | group      | groupV           | 99673     | 99722     | -1 | TCTGAAAGAGTTCAGGATCATTTCATATAGCCCTGGCTGAGCAGATCATT        | Gasterosteus aculeatus |
| 1351070 | chromosome | 19               | 8931226   | 8931275   | -1 | TCTGAAAGAGTTCAGGATCATTTCATATAGCCCTGGCTGAGCAGATCATT        | Oryzias latipes        |
| 1351070 | toplevel   | Zv7_NA53         | 454298    | 454347    | 1  | TCTGAAAGAGTTCAGGATCATTTCATATAGCCCTGGCTGAGCAGATCATT        | Danio rerio            |
| 1351070 | chromosome | 19               | 55458999  | 55459048  | 1  | TCTGAAAGAGTTCAGGATCATTTCATATAGCCCTGGCAGAGCAGATCATT        | Mus musculus           |
| 1351518 | reflig     | reftig_5         | 646435    | 646470    | -1 | GAACGGTGTGGTAAGTGGAAATGTAAGCAATATTTAA                     | Ciona savignyi         |
| 1351518 | chromosome | 22               | 28665120  | 28665160  | 1  | AAGTGTGACACAAGCAAAATAGAAATAATTAGTTCTCCAAA                 | Canis familiaris       |
| 1351518 | chromosome | 13               | 70937103  | 70937143  | 1  | AAGTGTGACACAAGCAAAATAGAAATAATTAGTTCTCCAAA                 | Homo sapiens           |
| 1351518 | scaffold   | scaffold_31      | 451880    | 451921    | -1 | GAAGTGTGACAAAAGCAAAATAGAAATAATTAGTTCTCTAAA                | Takifugu rubripes      |
| 1351518 | chromosome | 1p               | 2255332   | 2255372   | 1  | GAACGGTGTATTAAGCCCAATACAAGCAATTTGTTCTCAA                  | Ciona intestinalis     |
| 1351518 | chromosome | 21               | 9426761   | 9426802   | 1  | GAAGTGTGACAAAAGCAAAATAGAAATAATTAGTTCTCCAAA                | Oryzias latipes        |
| 1351518 | group      | groupXVI         | 2762024   | 2762065   | -1 | GAAGTGTGACAAAAGCAAAATAGAAATAATTAGTTCTCTAAA                | Gasterosteus aculeatus |
| 1351518 | toplevel   | 9                | 24998943  | 24998982  | -1 | AGTGTGACAAAAGCAAAATAGAAATAATTAGTTCTCTGAA                  | Danio rerio            |
| 1351518 | chromosome | 14               | 98214032  | 98214072  | 1  | AAGTGTGACACAAGCAAAATAGAAATAATTAGTTCTCCAAA                 | Mus musculus           |
| 1352693 | reflig     | reftig_1         | 3605347   | 3605404   | 1  | TTGAAAGGGCGACGAAAACACCGGAAATGATCTCAATACGCCAATGCAATATT     | Ciona savignyi         |
| 1352693 | chromosome | 22               | 28664719  | 28664775  | 1  | CCTTTGAAAGATTAATTAATCATGCAAAATAGCAAAATAGCCCATGCAAAATATT   | Canis familiaris       |
| 1352693 | chromosome | 13               | 70936702  | 70936758  | 1  | CCTTTGAAAGATTAATTAATCATGCAAAATAGCAAAATAGCCCATGCAAAATATT   | Homo sapiens           |
| 1352693 | scaffold   | scaffold_31      | 452284    | 452340    | -1 | CCTTTGAAAGATTAATTAATCATGCAAAATAGCAAAATAGCCCATGCAAAATATT   | Takifugu rubripes      |
| 1352693 | scaffold   | scaffold_119     | 90383     | 90440     | -1 | CGTTGAAAGGTTAAGGAAATACGAGTAAATGATCTCAATACGCCAATGCAAAATATT | Ciona intestinalis     |
| 1352693 | chromosome | 21               | 9426336   | 9426392   | 1  | CCTTTGAAAGATTAATTAATCATGCAAAATAGCAAAATAGCCCATGCAAAATATT   | Oryzias latipes        |
| 1352693 | group      | groupXVI         | 2762427   | 2762483   | -1 | CCTTTGAAAGATTAATTAATCATGCAAAATAGCAAAATAGCCCATGCAAAATATT   | Gasterosteus aculeatus |
| 1352693 | toplevel   | 9                | 24999335  | 24999391  | -1 | CCTTTGAAAGATTAATTAATCATGCAAAATAGCAAAATAGCCCATGCAAAATATT   | Danio rerio            |
| 1352693 | chromosome | 14               | 98213631  | 98213687  | 1  | CCTTTGAAAGATTAATTAATCATGCAAAATAGCAAAATAGCCCATGCAAAATATT   | Mus musculus           |
| 1349622 | reflig     | reftig_19        | 1629371   | 1629418   | 1  | AACACAACACCTGGCAGAAAACAGAATGACCTGACTTAAATTTAGGC           | Ciona savignyi         |
| 1349622 | chromosome | 9                | 61084637  | 61084686  | 1  | AACAGAATCCCTGGAGAAAACACACAGGGAATGCTGTAAATCCACT            | Canis familiaris       |
| 1349622 | chromosome | 9                | 127181516 | 127181565 | -1 | AACAGAATCCCTGGAGAAAACACACAGGGAATGCTGTAAATCCACT            | Homo sapiens           |
| 1349622 | scaffold   | scaffold_18      | 637591    | 637640    | -1 | AACCAATCCCTGGAGAAAACACATAAGGAAATCGCTGTAATTCCTT            | Takifugu rubripes      |
| 1349622 | scaffold   | scaffold_165     | 47789     | 47836     | 1  | AACACAACACCTGGCAGAAAACAAATGACCTGGCCCTTAAATTTGCTTA         | Ciona intestinalis     |
| 1349622 | group      | groupXIII        | 13457921  | 13457970  | -1 | AACCAATCCCTGGAGAAAACACATAAGGAAATCGCTGTAATTCACT            | Gasterosteus aculeatus |
| 1349622 | chromosome | 9                | 18840121  | 18840170  | -1 | AACCAATCCCTGGAGAAAACACATAAGGAAATCGCTGTAATTCACT            | Oryzias latipes        |
| 1349622 | toplevel   | 8                | 33470394  | 33470443  | -1 | AACCAATCCCTGGAGAAAACACATAAGGAAATCGCTGTAATTCACT            | Danio rerio            |
| 1349622 | chromosome | 2                | 34521101  | 34521150  | 1  | AACAGAATCCCTGGAGAAAACACACAGGGAATGCTGTAAACCCACT            | Mus musculus           |
| 1352377 | reflig     | reftig_2         | 1643329   | 1643368   | -1 | TGATTTGGCTTAATTCAGCGCTAAGTATTGATCTGAGTTTGT                | Ciona savignyi         |
| 1352377 | chromosome | 15               | 48058721  | 48058761  | -1 | TTATTTGCCTTAAGGACTTTATGTAATGATTCTGTCTGT                   | Canis familiaris       |
| 1352377 | chromosome | 4                | 147793774 | 147793814 | -1 | TTATTTGCCTTAAGGACTTTATGTAATGATTCTGTCTGT                   | Homo sapiens           |
| 1352377 | scaffold   | scaffold_17      | 1505535   | 1505575   | -1 | TTATTTGCCTTAAGGACTTTATGTAATGATTCTGTCTGT                   | Takifugu rubripes      |
| 1352377 | chromosome | 7q               | 491287    | 491326    | 1  | TCATTTGCCTTAAGGACTTTATGTAATGATTCTGTCTGT                   | Ciona intestinalis     |
| 1352377 | group      | groupIX          | 6738510   | 6738550   | 1  | TTATTTGCCTTAAGGACTTTATGTAATGATTCTGTCTGT                   | Gasterosteus aculeatus |
| 1352377 | chromosome | 1                | 22407732  | 22407772  | -1 | TTATTTGCCTTAAGGACTTTATGTAATGATTCTGTCTGT                   | Oryzias latipes        |
| 1352377 | toplevel   | 1                | 35364469  | 35364509  | -1 | TTATTTGCCTTAAGGACTTTATGTAATGATTCTGTCTGT                   | Danio rerio            |

|         |            |              |           |           |    |                                                 |                        |
|---------|------------|--------------|-----------|-----------|----|-------------------------------------------------|------------------------|
| 1352377 | chromosome | 8            | 80946009  | 80946049  | 1  | TTATTTGCCTTAAGGACTTTATGTAATGATTCTGTCTGT         | Mus musculus           |
| 1350888 | reflig     | reflig_9     | 2823395   | 2823430   | -1 | TTATATTTTCAAAACAGAGGGATTTTCAATTAATA             | Ciona savignyi         |
| 1350888 | chromosome | 21           | 41305126  | 41305165  | 1  | TTACAAACCTTTTCAACTTTAATTTGACTTTCAAATATTA        | Canis familiaris       |
| 1350888 | chromosome | 11           | 15279034  | 15279073  | 1  | TTACAAACCTTTTCAACTTTAATTTGACTTTCAAATATTA        | Homo sapiens           |
| 1350888 | scaffold   | scaffold_1   | 7218639   | 7218678   | -1 | TTACTGGCTTTTCAACTTAAATTTGACTTTCAAATATTA         | Takifugu rubripes      |
| 1350888 | chromosome | 12q          | 817081    | 817120    | 1  | TTGTTAGACTTTCAAACAAATTTGATTTTCAATTAATA          | Ciona intestinalis     |
| 1350888 | group      | groupII      | 9695998   | 9696037   | -1 | TTACAGGCCTTTTCAACTTAAATTTGACTTTCAAATATTA        | Gasterosteus aculeatus |
| 1350888 | chromosome | 3            | 17771450  | 17771489  | -1 | TTACAGTCTTTTCAACTTAAATTTGACTTTCAAATATTA         | Oryzias latipes        |
| 1350888 | toplevel   | 7            | 18711913  | 18711946  | -1 | GCCTTTCAACTTAAATTTGACTTTCAAATATTA               | Danio rerio            |
| 1350888 | chromosome | 7            | 122040822 | 122040861 | 1  | TTACAAACCTTTTCAACTTAAATTTGACTTTCAAATATTA        | Mus musculus           |
| 1352948 | reflig     | reflig_35    | 883430    | 883470    | -1 | TAGCGCTCGAGCAATCTGCAACATGATTATGTTCCACGA         | Ciona savignyi         |
| 1352948 | chromosome | 2            | 88017269  | 88017311  | 1  | TATTGCTCTCAGGGCCTTGAATATTACTTTAATGTTCCATGT      | Canis familiaris       |
| 1352948 | chromosome | 1            | 10848058  | 10848100  | -1 | TATTGCTCTCAGGGCCTTGAATATTACTTTAATGTTCCATGT      | Homo sapiens           |
| 1352948 | scaffold   | scaffold_20  | 741598    | 741639    | 1  | TATTGCTCTCAGGGCCTTGAATATTACTTTAATGTTCCATGT      | Takifugu rubripes      |
| 1352948 | chromosome | 3q           | 1319835   | 1319875   | 1  | TACCGCTCTCGAATCTGCAACATGATTATGTTCCACGA          | Ciona intestinalis     |
| 1352948 | chromosome | 7            | 9860235   | 9860276   | -1 | TATTGCTCTCAGGGCCTTGAATATTACTTTAATGTTCCATGT      | Oryzias latipes        |
| 1352948 | group      | groupXII     | 9355396   | 9355437   | -1 | TATTGCTCTCAGGGCCTTGAATATTACTTTAATGTTCCATGT      | Gasterosteus aculeatus |
| 1352948 | toplevel   | 23           | 25422769  | 25422809  | 1  | ATTGCTCTCAGGGCCTTGAATATTACTTTAATGTTCCATGT       | Danio rerio            |
| 1352948 | chromosome | 4            | 148118635 | 148118677 | 1  | TATTGCTCTCAGGGCCTTGAATATTACTTTAATGTTCCATGT      | Mus musculus           |
| 1349879 | reflig     | reflig_37    | 112686    | 112730    | -1 | ACCAATATTGTTTTATTTCATAATCCAATCCCGCTTTATGGCG     | Ciona savignyi         |
| 1349879 | chromosome | 1            | 124059547 | 124059592 | 1  | ACAAATATTGACAGTTTATTGCACAAACATCTCTGACATTTGAAG   | Canis familiaris       |
| 1349879 | chromosome | 19           | 35707025  | 35707070  | -1 | ACAAATATTGACAGTTTATTGCACAAACATCTCTGACATTTGAAG   | Homo sapiens           |
| 1349879 | scaffold   | scaffold_2   | 297434    | 297479    | 1  | ACAAATATTGACAGTTTATTGCACAAACATCTCTGACATTTGAAG   | Takifugu rubripes      |
| 1349879 | chromosome | 10p          | 958624    | 958666    | -1 | ACTAATATTGTTTTATTGCTTAATCCATACCSCCTTTCAAG       | Ciona intestinalis     |
| 1349879 | group      | groupXIX     | 17633795  | 17633840  | -1 | ACAAATATTGACAGTTTATTGCACAAACATCTCTGACATTTGAAG   | Gasterosteus aculeatus |
| 1349879 | chromosome | 6            | 25863473  | 25863518  | -1 | ACAAATATTGACAGTTTATTGCACAAACATCTCTGACATTTGAAG   | Oryzias latipes        |
| 1349879 | toplevel   | 7            | 42808530  | 42808575  | 1  | ACAAATATTGACAGTTTATTGCACAAACATTTGACATTTGAAG     | Danio rerio            |
| 1349879 | chromosome | 7            | 38288599  | 38288644  | 1  | ACAAATATTGACAGTTTATTGCACAAACATCTCTGACATTTGAAG   | Mus musculus           |
| 1354244 | reflig     | reflig_37    | 1576437   | 1576478   | -1 | CTGTAGATCAAAACCAAGCAAGCTATCCTTCTCTTTTGAA        | Ciona savignyi         |
| 1354244 | chromosome | 36           | 22338599  | 22338637  | 1  | CTGTAGGTTAGGATCAGAGCATGCTTAATTTGTTTTGTA         | Canis familiaris       |
| 1354244 | chromosome | 2            | 175943973 | 175944011 | 1  | CTGTAGGTTAGGATCAGAGCATGCTTAATTTGTTTTGTA         | Homo sapiens           |
| 1354244 | scaffold   | scaffold_100 | 450662    | 450700    | -1 | CTATAGGTTAAGATCAGAGCATGCTTAATTTGTTTTGTA         | Takifugu rubripes      |
| 1354244 | chromosome | 10q          | 3285717   | 3285756   | -1 | CTGTAGATCAAAACCAAGCAAGCTATCCTTCTTTTGAA          | Ciona intestinalis     |
| 1354244 | group      | groupXVI     | 9912717   | 9912755   | -1 | CTATAGGTTAAGATCAGAGCATGCTTAATTTGTTTTGTA         | Gasterosteus aculeatus |
| 1354244 | chromosome | 21           | 24461033  | 24461071  | 1  | CTATAGGTTAAGATCAGAGCATGCTTAATTTGTTTTGTA         | Oryzias latipes        |
| 1354244 | toplevel   | 9            | 2264198   | 2264231   | -1 | GGTTAAGATCAGAGCGTTTAATTTGTTTTGTA                | Danio rerio            |
| 1354244 | chromosome | 2            | 73909066  | 73909104  | 1  | CTGTAGGTTAGGATCAAAACATGCTTAATTTGTTTTGTA         | Mus musculus           |
| 1351246 | reflig     | reflig_1     | 386998    | 387037    | 1  | CGATTTACATATCTGAGTGGTCTTATCCCGTATTAAGAC         | Ciona savignyi         |
| 1351246 | chromosome | 28           | 16355659  | 16355696  | 1  | AGAATTACATCTTATGTCATCATTATGTTATTAAGCG           | Canis familiaris       |
| 1351246 | chromosome | 10           | 102404315 | 102404352 | 1  | AGAATTACATCTTATGTCATCATTATGTTATTAAGCG           | Homo sapiens           |
| 1351246 | scaffold   | scaffold_86  | 623784    | 623821    | -1 | GGAATTACATCTTATGTCATCATTATGTTATTAAGCG           | Takifugu rubripes      |
| 1351246 | chromosome | 3q           | 2192931   | 2192970   | 1  | GGATTTATATATCTATCTATGCTTATACCTTATTAAGTA         | Ciona intestinalis     |
| 1351246 | group      | groupVI      | 9677517   | 9677554   | 1  | GGAATTACATCTTATGTCATCATTATGTTATTAAGCG           | Gasterosteus aculeatus |
| 1351246 | chromosome | 15           | 21084005  | 21084042  | -1 | GGAATTACATCTTATGTCATCATTATGTTATTAAGCG           | Oryzias latipes        |
| 1351246 | toplevel   | 13           | 29145920  | 29145956  | 1  | GAATTACATCTTATGTCATCATTATGTTATTAAGCG            | Danio rerio            |
| 1351246 | chromosome | 19           | 44744799  | 44744836  | 1  | AGAATTACATCTTATGTCATCATTATGTTATTAAGCG           | Mus musculus           |
| 1351400 | reflig     | reflig_17    | 779609    | 779657    | 1  | GTTGAGCAGAACCAATAAATCGAGATTACTAAACGAGCGTAACTTAT | Ciona savignyi         |
| 1351400 | chromosome | 22           | 48663244  | 48663288  | 1  | GATAAACAGAGTGGAAAATTAAGATTAATAAATATGGTAATTCAT   | Canis familiaris       |
| 1351400 | chromosome | 13           | 94416959  | 94417003  | 1  | GATAAACAGAGTGGAAAATTAAGATTAATAAATATGGTAATTCAT   | Homo sapiens           |
| 1351400 | scaffold   | scaffold_103 | 117034    | 117078    | -1 | GATAAACAGAGTGGAAAATTAAGATTAATAAATATGGTAATTCAT   | Takifugu rubripes      |
| 1351400 | chromosome | 2q           | 123920    | 123968    | 1  | GCTAAGCAGAACTAAATAAATGAGATTACCAACAGCGGTAACCTCAT | Ciona intestinalis     |
| 1351400 | group      | groupXVI     | 9268760   | 9268804   | 1  | GATAAACAGAGTGGAAAATTAAGATTAATAAATATGGTAATTCAT   | Gasterosteus aculeatus |
| 1351400 | chromosome | 21           | 25474788  | 25474832  | -1 | GATAAACAGAGTGGAAAATTAAGATTAATAAATATGGTAATTCAT   | Oryzias latipes        |
| 1351400 | toplevel   | 14           | 2403023   | 2403067   | -1 | GATAAACAGAGTGGAAAATTAAGATTAATAAATATGGTAATTCAT   | Danio rerio            |
| 1351400 | chromosome | 14           | 118835187 | 118835231 | 1  | GATAAACAGAGTGGAAAATTAAGATTAATAAATATGGTAATTCAT   | Mus musculus           |
| 1353136 | reflig     | reflig_17    | 593499    | 593541    | -1 | AGCAGCAAAATAAACAGCTCGCGGCTTCTCGACGGATTAC        | Ciona savignyi         |
| 1353136 | chromosome | 28           | 41543171  | 41543217  | 1  | AGCATCAAGCTAATTAACAGTATTATGGCATTTTTGAAGATGAC    | Canis familiaris       |
| 1353136 | chromosome | 10           | 131584264 | 131584310 | 1  | AGCATCAAGCTAATTAACAGTATTATGGCATTTTTGAAGATGAC    | Homo sapiens           |
| 1353136 | scaffold   | scaffold_76  | 482377    | 482423    | 1  | AGCATCAAGCTAATTAACAGTATTATGGCATTTTTGAAGATGAC    | Takifugu rubripes      |
| 1353136 | chromosome | 2q           | 2261085   | 2261127   | -1 | AGCAGCAAAATAAACAGCTCGCGGCTTCTCGACGGATTAC        | Ciona intestinalis     |
| 1353136 | group      | groupVI      | 11277868  | 11277914  | -1 | AGCATCAAGCTAATTAACAGTATTATGGCATTTTTGAAGATGAC    | Gasterosteus aculeatus |
| 1353136 | chromosome | 15           | 18875866  | 18875912  | 1  | AGCATCAAGCTAATTAACAGTATTATGGCATTTTTGAAGATGAC    | Oryzias latipes        |
| 1353136 | toplevel   | 12           | 39082201  | 39082247  | 1  | AGCATCAAGCTAATTAACAGTATTATGGCATTTTTGAAGATGAC    | Danio rerio            |
| 1353136 | chromosome | 7            | 144444764 | 144444810 | 1  | AGCATCAAGCTAATTAACAGTATTATGGCATTTTTGAAGATGAC    | Mus musculus           |
| 1351602 | reflig     | reflig_19    | 4551112   | 4551157   | 1  | CCAGAGTGGTAATTAACAGTAAAGCTGTCGAGATAGGCGGTTGT    | Ciona savignyi         |
| 1351602 | chromosome | 24           | 4030301   | 4030347   | -1 | CTAGCATTTTTATTTCCGGCTCCAAGCTGTCAAAGACTGGAGAGTTT | Canis familiaris       |
| 1351602 | chromosome | 20           | 22491054  | 22491100  | 1  | CTAGCATTTTTATTTCCGGCTCCAAGCTGTCAAAGACTGGAGAGTTT | Homo sapiens           |
| 1351602 | scaffold   | scaffold_23  | 397587    | 397633    | 1  | CTAGCATTTTTATTTCCAGCTCCAAGCTGTCAAAGACTGGAGAGTTT | Takifugu rubripes      |
| 1351602 | chromosome | 2q           | 5714214   | 5714259   | 1  | CCAGAGTGGTAATTAACAGTAAAGCTGTCGAGATTGGCGGTTTT    | Ciona intestinalis     |
| 1351602 | chromosome | 22           | 16034554  | 16034600  | -1 | CTAGCATTTTTATTTCCAGCTCCAAGCTGTCAAAGACTGGAGAGTTT | Oryzias latipes        |
| 1351602 | group      | groupXV      | 3763397   | 3763443   | -1 | CTAGCATTTTTATTTCCAGCTCCAAGCTGTCAAAGACTGGAGAGTTT | Gasterosteus aculeatus |
| 1351602 | toplevel   | 17           | 43835200  | 43835245  | 1  | CTAGCATTTTTATTTCCGGCTCCAAGCTGTCAAAGACTGGAGAGTTT | Danio rerio            |
| 1351602 | chromosome | 2            | 147849293 | 147849339 | 1  | CTAGCATTTTTATTTCCGGCTCCAAGCTGTCAAAGACTGGAGAGTTT | Mus musculus           |
| 1353884 | reflig     | reflig_3     | 715089    | 715130    | -1 | TTACCGGAGGCAAGTGTAGCATTCTGATAGACAGATGATATGATA   | Ciona savignyi         |
| 1353884 | chromosome | 20           | 23876697  | 23876737  | -1 | TTACCTGGGGCTGCAATCCAATTTGAAGTGATGACAAGAAA       | Canis familiaris       |
| 1353884 | chromosome | 3            | 71237164  | 71237204  | 1  | TTACCTGGGGCTGCAATCCAATTTGAAGTGATGACAAGAAA       | Homo sapiens           |
| 1353884 | scaffold   | scaffold_150 | 614682    | 614722    | 1  | TTACCTGGGGCTGCAATCCAATTTGAAGTGATGACAAGAAA       | Takifugu rubripes      |
| 1353884 | chromosome | 4q           | 3836759   | 3836800   | 1  | TTACCGGAGGCAAGTGTAGAAATTTGTAGACAGATGAGAAGAGA    | Ciona intestinalis     |
| 1353884 | group      | groupXVII    | 13952214  | 13952254  | -1 | TTACCTGGGGCTGCAATCCAATTTGAAGTGATGACAAGAAA       | Gasterosteus aculeatus |
| 1353884 | chromosome | 5            | 4978907   | 4978947   | -1 | TTACCTGGGGCTGCAATCCAATTTGAAGTGATGACAAGAAA       | Oryzias latipes        |
| 1353884 | toplevel   | 6            | 30476483  | 30476523  | 1  | TTACCTGGGGCTGCAATCCAATTTGAAGTGATGACAAGAAA       | Danio rerio            |
| 1353884 | chromosome | 6            | 99018084  | 99018124  | 1  | TTACCTGGGGCTGCAATCCAATTTGAAGTGATGACAAGAAA       | Mus musculus           |
| 1353461 | reflig     | reflig_2     | 2660465   | 2660505   | 1  | ATTATTAACGCAAAACACTCCATGATTATTCATGCAC           | Ciona savignyi         |
| 1353461 | chromosome | 20           | 23753056  | 23753098  | -1 | ATTGGTTAAAGTTTAAAACAAATACCAATTTTGTAAATGAAC      | Canis familiaris       |
| 1353461 | chromosome | 3            | 71373655  | 71373697  | 1  | ATTGGTTAAAGTTTAAAACAAATACCAATTTTGTAAATGAAC      | Homo sapiens           |
| 1353461 | scaffold   | scaffold_150 | 646361    | 646403    | 1  | ATTGGTTAAAGTTTAAAACAAATACCAATTTTGTAAATGAAC      | Takifugu rubripes      |
| 1353461 | chromosome | 7q           | 2134068   | 2134108   | 1  | ATTATTAAGTCAAACAGTCCATACATTTAATGACC             | Ciona intestinalis     |
| 1353461 | group      | groupXVII    | 13919943  | 13919985  | -1 | ATTGGTTAAAGTTGAAAACAAATACGCAATTTTGTAAATGAAC     | Gasterosteus aculeatus |
| 1353461 | chromosome | 5            | 4935622   | 4935664   | -1 | ATTGGTTAAAGTTGAAAACAAATACGCAATTTTGTAAATGAAC     | Oryzias latipes        |
| 1353461 | toplevel   | 6            | 30557451  | 30557493  | 1  | ATTGGTTAAAGTTTAAAACAAATACCAATTTTCCGCTAATGAA     | Danio rerio            |

|         |            |              |           |           |    |                                                      |                        |
|---------|------------|--------------|-----------|-----------|----|------------------------------------------------------|------------------------|
| 1353461 | chromosome | 6            | 99151773  | 99151815  | 1  | ATTGGTTAAAGTTTAAACAAATACCAAAATTTTGTATGAAC            | Mus musculus           |
| 1350669 | reflig     | reflig_19    | 4768711   | 4768752   | 1  | ATTTCTGATGCCGCTTCATTCATTAATATATAATTTTAC              | Ciona savignyi         |
| 1350669 | chromosome | 28           | 31749194  | 31749237  | 1  | ATTTTGAAGCTAATTCATTTATTAATATATTTAACTCTGAC            | Canis familiaris       |
| 1350669 | chromosome | 10           | 120108127 | 120108170 | 1  | ATTTTGAAGCTAATTCATTTATTAATATATTTAACTCTGAC            | Homo sapiens           |
| 1350669 | scaffold   | scaffold_53  | 12072000  | 1207242   | 1  | ATTTTGAAGCTAATTCATTTATTAACCATATTTACTCTGAC            | Takifugu rubripes      |
| 1350669 | chromosome | 2q           | 2592769   | 2592808   | 1  | ATTTCTGATGCCGTTTCATTCATTAATATTTAATTTTAC              | Ciona intestinalis     |
| 1350669 | group      | groupVI      | 2777620   | 2777662   | 1  | ATTTTGAAGCTAATTCATTTATTAACCTTTTACTCTGAC              | Gasterosteus aculeatus |
| 1350669 | chromosome | 15           | 29591064  | 29591106  | -1 | ATTTTGAAGCTAATTCATTTATTAACCATATTTACTCTGAC            | Oryzias latipes        |
| 1350669 | toplevel   | 13           | 12377980  | 12378022  | 1  | ATTTTGAAGTAAATTCATTTATTAACCATATTTACGCAGAC            | Danio rerio            |
| 1350669 | chromosome | 19           | 60318892  | 60318935  | 1  | ATTTTGAAGCTAATTCATTTATTAATATATTTTAACTCTGAC           | Mus musculus           |
| 1350760 | reflig     | reflig_7     | 2698983   | 2699038   | 1  | TCATTTAAAGATCATTCCCACACTCTTTTGTGGCCATTCCTAAATAAAAAAG | Ciona savignyi         |
| 1350760 | chromosome | 9            | 60686130  | 60686184  | 1  | CCATTTACATATCATAAATTAAGCCCTCTCTCTCATCCTTAAATCATAATG  | Canis familiaris       |
| 1350760 | chromosome | 9            | 127623969 | 127624023 | -1 | CCATTTACATATCATAAATTAAGCCCTCTCTCTCATCCTTAAATCATAATG  | Homo sapiens           |
| 1350760 | scaffold   | scaffold_18  | 735412    | 735466    | -1 | GCATTTACATATCATAAATTAAGCCCTCTCTCTCATCCTTAAATATTAATG  | Takifugu rubripes      |
| 1350760 | chromosome | 8q           | 5309519   | 5309573   | 1  | GCCTTTAAAGATCATGCCCGCCAGCTTTTGTGGCCATTTAAATAAAGATG   | Ciona intestinalis     |
| 1350760 | group      | groupXIII    | 13550424  | 13550478  | -1 | CCATTTACATATCATAAATTAAGCCCTCTCTCTTAAATCATAATG        | Gasterosteus aculeatus |
| 1350760 | chromosome | 9            | 18953891  | 18953945  | -1 | CCATTTACATATCATAAATTAAGCCCTCTCTCTCATCCTTAAATCATAATG  | Oryzias latipes        |
| 1350760 | toplevel   | 8            | 32406200  | 32406253  | -1 | CATTTACATATCATAAATTAAGCCCTCTCTCTCATCCTTAAATCATAATG   | Danio rerio            |
| 1350760 | chromosome | 2            | 34166373  | 34166427  | 1  | CCATTTACATATCATAAATTAAGCCCTCTCTCTCATCCTTAAATCATAATG  | Mus musculus           |
| 1351589 | reflig     | reflig_1     | 2385742   | 2385788   | -1 | AAACGCTTAATTGAAGCACTTCGCAAAATACGAATAAATTCACG         | Ciona savignyi         |
| 1351589 | chromosome | 35           | 12755250  | 12755298  | 1  | AAATTTGTTAAATGAATAAATAGCTAAAGAAATGAAGATCATCTTTATG    | Canis familiaris       |
| 1351589 | chromosome | 6            | 10041536  | 10041584  | 1  | AAATTTGTTAAATGAATAAATAGCTAAAGAAATGAAGATCATCTTTATG    | Homo sapiens           |
| 1351589 | scaffold   | scaffold_162 | 406079    | 406127    | -1 | AAATTTGTTAAATGAATAAATAGCTGAGAATGAAGATCATCTTTATG      | Takifugu rubripes      |
| 1351589 | chromosome | 3p           | 1211665   | 1211711   | -1 | AAACGGTTAATTGAAGCACTTCGCAAAATACGAATAAATTCATG         | Ciona intestinalis     |
| 1351589 | group      | groupXXI     | 4163046   | 4163094   | 1  | AAATTTGTTAAATGAATAAATAGCTGAGAATGAAGATCATCTTTATG      | Gasterosteus aculeatus |
| 1351589 | chromosome | 20           | 10922008  | 10922056  | 1  | AAATTTGTTAAATGAATAAATAGCTGAGAATGAAGATCATCTTTATG      | Oryzias latipes        |
| 1351589 | toplevel   | Zv7_NA1854   | 9969      | 10017     | -1 | AAATTTGTTAAATGAATAAATAGCTGAGAATGAAGATCATCTTTCTG      | Danio rerio            |
| 1351589 | chromosome | 13           | 40376291  | 40376339  | 1  | AAATTTGTTAAATGAATAAATAGCTAAAGAAATGAAGATCATCTTTATG    | Mus musculus           |
| 1354247 | reflig     | reflig_37    | 1576368   | 1576415   | -1 | CATCTCATGTGTTTGTATTGTACTAACTGTTTAAATTTATTTTTTGC      | Ciona savignyi         |
| 1354247 | chromosome | 9            | 26232110  | 26232155  | -1 | CAGCTTGATGAACATTCGCGTAATAACCATCTCTTACATACTGC         | Canis familiaris       |
| 1354247 | chromosome | 17           | 34972875  | 34972920  | 1  | CAGCTTGATGAACATTCGCGTAATAACCATCTCTTACATACTGC         | Homo sapiens           |
| 1354247 | scaffold   | scaffold_80  | 807863    | 807910    | -1 | CAGCTTGATGAACGTTGCTGTGAATAACAGCTCATTACATTTCTGC       | Takifugu rubripes      |
| 1354247 | chromosome | 10q          | 3285648   | 3285695   | -1 | CATCTCATGTGTTTGTATTGTACTAACTGTTTAAATTTACTTTTTGC      | Ciona intestinalis     |
| 1354247 | group      | groupIII     | 13097907  | 13097954  | -1 | CAGCTTGATGAACGTTGCTGTGAATAACAGCTCATTACATTTCTGC       | Gasterosteus aculeatus |
| 1354247 | chromosome | 17           | 30337117  | 30337164  | 1  | CAGCTTGATGAACGTTGCTGTGAATAACAGCTCATTACATTTCTGC       | Oryzias latipes        |
| 1354247 | toplevel   | 24           | 30905815  | 30905856  | 1  | GCTTGATGAACGTTGCTGTGAATAACCATCTCTTACATCTTC           | Danio rerio            |
| 1354247 | chromosome | 11           | 98145157  | 98145202  | 1  | CAGCTTGATGAACATTCGCGTAATAACCATCTCTTACATACTGC         | Mus musculus           |
| 1354048 | reflig     | reflig_11    | 1364624   | 1364667   | -1 | CCATTTGTTAGAGAGAAACATCTGCCGCAAGTCGAAAAATCT           | Ciona savignyi         |
| 1354048 | chromosome | 27           | 26837614  | 26837658  | -1 | CCATTTTGAACAACAAAAACATCTGGCCATAAATCCTCAATCT          | Canis familiaris       |
| 1354048 | chromosome | 12           | 23608796  | 23608840  | 1  | CCATTTTGAACAACAAAAACATCTGGCCATAAATCCTCAATCT          | Homo sapiens           |
| 1354048 | scaffold   | scaffold_273 | 146881    | 146927    | -1 | CCATTTTTCGAAACAAAAACATCTGGGACCGCAAAATCCTACTAATCT     | Takifugu rubripes      |
| 1354048 | chromosome | 3q           | 990067    | 990110    | 1  | CCATTTGTTAGAGAAATGGAACATCTGCCGCAAGTCGAAAAATCT        | Ciona intestinalis     |
| 1354048 | chromosome | 23           | 435056    | 435102    | 1  | CCATTTTTCGAAACAAAAACATCTGGGACCGGAAATCCTCAATCT        | Oryzias latipes        |
| 1354048 | group      | groupIV      | 21316714  | 21316760  | 1  | CCATTTTCTGAAACAAAAACATCTGGGACCGGAAATCCTACTAATCT      | Gasterosteus aculeatus |
| 1354048 | toplevel   | 4            | 17745693  | 17745738  | 1  | CCATTTTTCGAAACAAAAACATCTGGGTCGCAAAATCCTACTAATCT      | Danio rerio            |
| 1354048 | chromosome | 6            | 143811414 | 143811458 | 1  | CCATTTTTCGAAACAAAAACATCTGGGCAATAAATCCTCAATCT         | Mus musculus           |
| 1353620 | reflig     | reflig_91    | 136591    | 136632    | 1  | CGCGGATGCATTAATTTATCCGATCGAAATTAATAGCGGAA            | Ciona savignyi         |
| 1353620 | chromosome | 28           | 4314319   | 4314358   | -1 | CAGTGGTGCAATAAATTAATACATGCATTTAATAACCAAA             | Canis familiaris       |
| 1353620 | chromosome | 10           | 50274953  | 50274992  | -1 | CAGTGGTGCAATAAATTAATACACGCATTTAATAACCAAA             | Homo sapiens           |
| 1353620 | scaffold   | scaffold_24  | 782186    | 782225    | -1 | CAGCGGTGCAATAAATTAATACGCGCATTTAATAACCAAA             | Takifugu rubripes      |
| 1353620 | chromosome | 5q           | 6140054   | 6140095   | 1  | CGCGGATGCATTAATTTATCCGATCGAAATTAATAGCGGAA            | Ciona intestinalis     |
| 1353620 | group      | groupVI      | 8143290   | 8143329   | 1  | CAGTGGTGCAATAAATTAATACGCGCATTTAATAACCAAA             | Gasterosteus aculeatus |
| 1353620 | chromosome | 15           | 23044696  | 23044735  | -1 | CAGTGGTGCAATAAATTAATACGCGCATTTAATAACCAAA             | Oryzias latipes        |
| 1353620 | toplevel   | 13           | 30381126  | 30381165  | 1  | CAGCGGTGCAATAAATTAATACACGCATTTAATAACCAAA             | Danio rerio            |
| 1353620 | chromosome | 14           | 33411708  | 33411747  | 1  | CAGTGGTGCAATAAATTAATACACGCATTTAATAACCAAA             | Mus musculus           |
| 1351471 | reflig     | reflig_54    | 2554557   | 2554602   | -1 | TTATAATTTTCCAGTCGGATCGTAATTTGGCAATTTTCGATTTAA        | Ciona savignyi         |
| 1351471 | chromosome | 18           | 13326135  | 13326178  | 1  | TTATGATTAATTTGATCAGTAATTTCTCTGTTTTTCATTTTAA          | Canis familiaris       |
| 1351471 | chromosome | 7            | 39360000  | 39360043  | -1 | TTATGATTAATTTGATCAGTAATTTCTCTGTTTTTCATTTTAA          | Homo sapiens           |
| 1351471 | scaffold   | scaffold_223 | 244943    | 244986    | -1 | TTATGATTAATTTGATCAGTAATTTCTCTGTTTTTCATTTTAA          | Takifugu rubripes      |
| 1351471 | chromosome | 12p          | 1020141   | 1020185   | 1  | TTATAATTTAAGCGTCGATTCGTAATTTGCCAATTTTCGATTTAA        | Ciona intestinalis     |
| 1351471 | group      | groupXXI     | 9778753   | 9778796   | -1 | TTATGATTAATTTGATCAGTAATTTCTCTGTTTTTCATTTTAA          | Gasterosteus aculeatus |
| 1351471 | chromosome | 20           | 19212591  | 19212634  | -1 | TTATGATTAATTTGATCAGTAATTTCTCTGTTTTTCATTTTAA          | Oryzias latipes        |
| 1351471 | toplevel   | 24           | 9476670   | 9476713   | 1  | TTATGATTAATTTGATCAGTAATTTCTCTGTTTTTCATTTTAA          | Danio rerio            |
| 1351471 | chromosome | 13           | 18310798  | 18310841  | 1  | TTATGATTAATTTGATCAGTAATTTCTCTGTTTTTCATTTTAA          | Mus musculus           |
| 1354230 | reflig     | reflig_44    | 127188    | 127227    | -1 | AAAAAACTAATCAAAATCAGACGTCGCGGAAATAGCCG               | Ciona savignyi         |
| 1354230 | chromosome | 8            | 52260396  | 52260438  | 1  | AAAACTACTCATCCGTGTAATCGGAATTTTGGAAATGAGAAG           | Canis familiaris       |
| 1354230 | chromosome | 14           | 75807835  | 75807877  | 1  | AAAACTACTCATCCGTGTAATCGGAATTTTGGAAATGAGAAG           | Homo sapiens           |
| 1354230 | scaffold   | scaffold_193 | 463775    | 463817    | 1  | AAAACTACTCGTCATGTAATCGGAATTTTGGAAATGAGAAG            | Takifugu rubripes      |
| 1354230 | chromosome | 10q          | 3931400   | 3931439   | -1 | AAAGTTACTCTAATCGAATCGGAATTTTGGAAATGAGC               | Ciona intestinalis     |
| 1354230 | chromosome | 22           | 13067303  | 13067345  | 1  | AAAACTACTCGTCATGTAATCGGAATTTTGGAAATGAGAAG            | Oryzias latipes        |
| 1354230 | group      | groupXV      | 4632056   | 4632098   | -1 | AAAACTACTCGTCATGTAATCGGAATTTTGGAAATGAGAAG            | Gasterosteus aculeatus |
| 1354230 | toplevel   | 17           | 48254278  | 48254320  | -1 | AAAACTACTCGTCATGTAATCGGAATTTTGGAAATGAGCAG            | Danio rerio            |
| 1354230 | chromosome | 12           | 87672243  | 87672285  | 1  | AAAACTACTCGTCATGTAATCGGAATTTTGGAAATGAGAAG            | Mus musculus           |
| 1352852 | reflig     | reflig_0     | 1543006   | 1543048   | 1  | TGCCATAATATGATAACTTTCATTTCAATATTTTAAAT               | Ciona savignyi         |
| 1352852 | chromosome | 36           | 19511866  | 19511904  | 1  | CAACATAATTACAGTAATTTACAGTTTTTATTTCTAAT               | Canis familiaris       |
| 1352852 | chromosome | 2            | 172664863 | 172664901 | 1  | CAACATAATTACAGTAATTTACAGTTTTTATTTCTAAT               | Homo sapiens           |
| 1352852 | scaffold   | scaffold_100 | 686189    | 686227    | -1 | CACCATAATTACAGTCATTTCCGCCCTATTTATTCTAAT              | Takifugu rubripes      |
| 1352852 | chromosome | 10q          | 2073875   | 2073914   | -1 | TACTATAATTGATACITTCATTTCAATTTGTTTTTAAAT              | Ciona intestinalis     |
| 1352852 | chromosome | 21           | 24081705  | 24081744  | 1  | CAGCATAATTACAGTAATTTCCGCCCTATTTATTCTAAT              | Oryzias latipes        |
| 1352852 | group      | groupXVI     | 10184891  | 10184929  | -1 | CAGCATAATTACAGTAATTTCCGCCCTATTTATTCTAAT              | Gasterosteus aculeatus |
| 1352852 | toplevel   | 9            | 3016860   | 3016895   | -1 | CATAATTACAGTCATTTCCCTCTTACTTATTCTAAT                 | Danio rerio            |
| 1352852 | chromosome | 2            | 71374184  | 71374222  | 1  | CAACATAATTACAGTAATTTACAGTTTTTATTTCTAAT               | Mus musculus           |
| 1350630 | reflig     | reflig_251   | 78343     | 78384     | 1  | GAAACCCAGTCCATTAAGCTGCGAAATAAAACACTCC                | Ciona savignyi         |
| 1350630 | chromosome | 22           | 28450408  | 28450449  | 1  | GAAAAATCAATTTCAATTTAAATTTTGGAAATAAAGAACCC            | Canis familiaris       |
| 1350630 | chromosome | 13           | 70692018  | 70692059  | 1  | GAAAAATCAATTTCAATTTAAATTTTGGAAATAAAGAACCC            | Homo sapiens           |
| 1350630 | scaffold   | scaffold_31  | 459313    | 459354    | -1 | GAAAAATCAATTTCAATTTAAATTTTGGAAATAAAGAACCTCC          | Takifugu rubripes      |
| 1350630 | chromosome | 2q           | 4248493   | 4248534   | 1  | GAAACCCAGTCCCAATTAAGCTGCGAAATAAAACACTCC              | Ciona intestinalis     |
| 1350630 | chromosome | 21           | 9415011   | 9415052   | 1  | GAAAAATCAATTTCAATTTAAATTTTGGAAATAAAGAACCTCC          | Oryzias latipes        |
| 1350630 | group      | groupXVI     | 2768044   | 2768085   | -1 | GAAAAATCAATTTCCCAATTTAAATTTTGGAAATAAAGAACCTCC        | Gasterosteus aculeatus |
| 1350630 | toplevel   | 9            | 25016473  | 25016514  | -1 | GAAAAATCAATTTCAATTTAAATTTTGGAAATAAAGAACCTCC          | Danio rerio            |

|                    |              |           |           |    |                                                         |                        |
|--------------------|--------------|-----------|-----------|----|---------------------------------------------------------|------------------------|
| 1350630 chromosome | 14           | 97959671  | 97959712  | 1  | GAAAAATCAAGTTCCAATTTAAATATTGGAATAAAGAACACC              | Mus musculus           |
| 1352726 reftig     | refitg_107   | 254400    | 254442    | 1  | CATGGATCCAGTACACATCCGTGACTAAACATGTAACCGTT               | Ciona savignyi         |
| 1352726 chromosome | 28           | 41540721  | 41540762  | 1  | CATACATAATGTACAACCTCTCCATTTAATATGCAAAATTTT              | Canis familiaris       |
| 1352726 chromosome | 10           | 131581626 | 131581667 | 1  | CATACATAATGTACAACCTCCCTCAATTAATATGCAAAATTTT             | Homo sapiens           |
| 1352726 scaffold   | scaffold_76  | 480556    | 480597    | 1  | CATGCATAATGCACAACCTCCCTCAATTAATATGCAAAATTTT             | Takifugu rubripes      |
| 1352726 chromosome | 3p           | 3792072   | 3792114   | -1 | CATGGATCATAGTACTCCATCCGTGACTAAACATGCAAAACTT             | Ciona intestinalis     |
| 1352726 group      | groupVI      | 11279767  | 11279808  | -1 | CATGCATAATGCACAACCTCCCTCAATTAATATGCAAAATTTT             | Gasterosteus aculeatus |
| 1352726 chromosome | 15           | 18874023  | 18874064  | 1  | CATGCATAATGCACAACCTCCCTCAATTAATATGCAAAATTTT             | Oryzias latipes        |
| 1352726 toplevel   | 12           | 39079416  | 39079457  | 1  | CATGCATAATGTACAACCTCCCTCAATTAATATGCAAAATTTT             | Danio rerio            |
| 1352726 chromosome | 7            | 144442287 | 144442328 | 1  | CATACATAATGTACAACCTCCCTCAATTAATATGCAAAATTTT             | Mus musculus           |
| 1350233 reftig     | refitg_37    | 1557639   | 1557685   | -1 | TCAGTTGATTTAACACATATCATGCATGTTGGAATAGACTAGTTTAT         | Ciona savignyi         |
| 1350233 chromosome | 14           | 46790568  | 46790613  | 1  | ATTAACCTAATTAACAAATTTGCATGCATATTCATCAGGCTATTGA          | Canis familiaris       |
| 1350233 chromosome | 7            | 31241117  | 31241162  | 1  | ATTAACCTAATTAACAAATTTGCATGCATATTCATCAGGCTATTGA          | Homo sapiens           |
| 1350233 scaffold   | scaffold_29  | 1341496   | 1341541   | 1  | ATTAACCTAATTAACAAATTCACATGCATATTCATCAGCCTATTAA          | Takifugu rubripes      |
| 1350233 chromosome | 10q          | 3268625   | 3268670   | -1 | ATCAGTTGATTTAACTCAATAATGCATGTTGACTAGCCTAGTAC            | Ciona intestinalis     |
| 1350233 chromosome | 19           | 8639464   | 8639509   | 1  | ATTAACCTAATTAACAAATTCACATGCATATTCATCAGCCTATTAA          | Oryzias latipes        |
| 1350233 group      | groupV       | 8010973   | 8011018   | -1 | ATTAACCTAATTAACAAATTCACATGCATATTCATCAGCCTATTAA          | Gasterosteus aculeatus |
| 1350233 toplevel   | 24           | 30905753  | 30905796  | 1  | ATTAACCTAATTAACAAATTTGCATGCATATTCATCAAGCTATT            | Danio rerio            |
| 1350233 chromosome | 6            | 55529744  | 55529789  | 1  | ATTAACCTAATTAACAAATTTGCATGCATATTCATCAGGCTATTGA          | Mus musculus           |
| 1351312 reftig     | refitg_76    | 1552314   | 1552356   | 1  | TACTTTTCAACAAGGGCTTATGTATTAATATAGGGCTAACGG              | Ciona savignyi         |
| 1351312 chromosome | 22           | 28924479  | 28924524  | 1  | TATTTAAATAAAATCTAATCCTGCATTTAAGGCTCACATAAAT             | Canis familiaris       |
| 1351312 chromosome | 13           | 71199271  | 71199316  | 1  | TATTTAAATAAAATCTAATCCTGCATTTAAGGCTCACATAAAT             | Homo sapiens           |
| 1351312 scaffold   | scaffold_31  | 409139    | 409184    | -1 | TATTTAAATAAAATCTAATCCTGCATTTAAGGCTCACATAAAT             | Takifugu rubripes      |
| 1351312 chromosome | 14p          | 2664996   | 2665041   | -1 | TACTTAATAAACATTTGCTGATGATTTCAATAGGGCTTAGGTAGGT          | Ciona intestinalis     |
| 1351312 chromosome | 21           | 9487996   | 9488041   | 1  | TATTTAAATAAAATCTAATCCTGCATTTAAGGCTCACATAAAT             | Oryzias latipes        |
| 1351312 group      | groupXVI     | 2722516   | 2722561   | -1 | TATTTAAATAAAATCTAATCCTGCATTTAAGGCTCACATAAAT             | Gasterosteus aculeatus |
| 1351312 toplevel   | 9            | 24892413  | 24892458  | -1 | TATTTAAATAAAATCTAATCCTGCATTTAAGGCTCACATAAAT             | Danio rerio            |
| 1351312 chromosome | 14           | 98446266  | 98446311  | 1  | TATTTAAATAAAATCTAATCCTGCATTTAAGGCTCACATAAAT             | Mus musculus           |
| 1352396 reftig     | refitg_4     | 860590    | 860630    | -1 | AACCGTATTAATGATTAATTTGACGGGATTCAGAAAGATT                | Ciona savignyi         |
| 1352396 chromosome | 9            | 61018620  | 61018661  | 1  | AGCGGTTCTGCATGACTAGTTAAAGAAAGTGGCAAGAAGATT              | Canis familiaris       |
| 1352396 chromosome | 9            | 127265186 | 127265227 | -1 | AGCGGTTCTGCATGACTAGTTAAAGAAAGTGGCAAGAAGATT              | Homo sapiens           |
| 1352396 scaffold   | scaffold_18  | 681409    | 681450    | -1 | AGCGGTTCTGCATGACTAGTTAAAGAAAGTGGCATGAAGATT              | Takifugu rubripes      |
| 1352396 chromosome | 9q           | 3328232   | 3328272   | 1  | AGCGGTAAATGATTAATTTGACGGGATTCACAGCAGATT                 | Ciona intestinalis     |
| 1352396 group      | groupXIII    | 13493160  | 13493201  | -1 | AGCGGTTCTGCATGACTAGTTAAAGAAAGTGGCATGAAGATT              | Gasterosteus aculeatus |
| 1352396 chromosome | 9            | 18878489  | 18878530  | -1 | AGCGGTTCTGCATGACTAGTTAAAGAAAGTGGCATGAAGATT              | Oryzias latipes        |
| 1352396 toplevel   | 8            | 33596413  | 33596454  | -1 | AGCGGTTCTGCATGACTAGTTAAAGAAAGTGGCATGAAGATT              | Danio rerio            |
| 1352396 chromosome | 2            | 34457822  | 34457863  | 1  | AACGGTCTGCATGACTAGTTAAAGAAAGTGGCAAGAAGATT               | Mus musculus           |
| 1350574 reftig     | refitg_24    | 407659    | 407705    | 1  | ATTAGCGTGCATATCAAGCCCGCAATTCACCTCACCCGCAACCC            | Ciona savignyi         |
| 1350574 chromosome | 9            | 26232151  | 26232197  | -1 | ATTCACATGCATATTCATCAGGCTAATTAATGCTCTCCGCTCAGCT          | Canis familiaris       |
| 1350574 chromosome | 17           | 34972833  | 34972879  | 1  | ATTCACATGCATATTCATCAGGCTAATTAATGCTCTCCGCTCAGCT          | Homo sapiens           |
| 1350574 scaffold   | scaffold_15  | 1667399   | 1667445   | 1  | ATTTGCATGCATATTCATCAGGCTAATTAATGCTCTCCGCTCAGCT          | Takifugu rubripes      |
| 1350574 chromosome | 8q           | 4493614   | 4493660   | 1  | ATTAGCGTGCATATTCAGGCGGCAATTAACGCTCTCACCCGACGGCT         | Ciona intestinalis     |
| 1350574 group      | groupXI      | 6132226   | 6132272   | 1  | ATTCACATGCATATTCATCAGGCTAATTAATGCTCTCCGCTCAGCT          | Gasterosteus aculeatus |
| 1350574 chromosome | 8            | 5817555   | 5817601   | -1 | ATTCACATGCATATTCATCAGGCTAATTAATGCTCTCCGCTCAGCT          | Oryzias latipes        |
| 1350574 toplevel   | 24           | 30905770  | 30905807  | 1  | ATTTGCATGCATATTCATCAGGCTAATTAATGCTCTCCGCTCAGCT          | Danio rerio            |
| 1350574 chromosome | 11           | 98145115  | 98145161  | 1  | ATTCACATGCATATTCATCAGGCTAATTAATGCTCTCCGCTCAGCT          | Mus musculus           |
| 1350574 reftig     | refitg_91    | 136575    | 136628    | 1  | GACAAAGTTAGTAATGCGCGGATGCATTTATTTCCCGTCGAAATTAATAGC     | Ciona savignyi         |
| 1353622 chromosome | 35           | 12689535  | 12689590  | 1  | GGCAGGATTACTGATGCAGGACAGCCAGTTATTAACACACTTAAATTAACGC    | Canis familiaris       |
| 1353622 chromosome | 6            | 9949969   | 9950024   | 1  | GGCAGGATTACTGATGCAGGACAGGATGAGTTATTAACACACTTAAATTAACGC  | Homo sapiens           |
| 1353622 scaffold   | scaffold_162 | 415504    | 415559    | -1 | GGCAGGATTACTGATGCAGGACAGCTTATTAATTAACACACTTAAATTAACGC   | Takifugu rubripes      |
| 1353622 chromosome | 5q           | 6140038   | 6140091   | 1  | GACAAAGTTAGTAATGCGGCGATGCATTTATTTCCGATCGAAATTAATAGC     | Ciona intestinalis     |
| 1353622 chromosome | 20           | 10910398  | 10910453  | 1  | GGCAGGATTACTGATGCAGGCTGCCTTAGTTATTAACACGTTCTAGATTAATGC  | Oryzias latipes        |
| 1353622 group      | groupXXI     | 4151730   | 4151785   | 1  | GGCAGGATTACTGATGCAGGCTGCCTTAGTTATTAACACGTTCTAAATTAATGC  | Gasterosteus aculeatus |
| 1353622 toplevel   | Zv7_NA1854   | 33300     | 33355     | -1 | GGCAGGATTACTGATGCAGGACAGGCTTATTAATTAACACGTTCTAAATTAATGC | Danio rerio            |
| 1353622 chromosome | 13           | 40303388  | 40303443  | 1  | GGCAGGATTACTGATGCAGGACAGGATTTAATTAACACACTTAAATTAACGC    | Mus musculus           |
| 1350521 reftig     | refitg_25    | 92564     | 92611     | 1  | AAGCGAGGCGAAGCTGTCAGGACACCGTGAAGTTTATGACGGTTT           | Ciona savignyi         |
| 1350521 chromosome | 28           | 35639135  | 35639183  | 1  | GCAGAAAGCGAAGCTGTTATGACACTAGAAATGCTTTATTGATAGCTT        | Canis familiaris       |
| 1350521 chromosome | 10           | 124842785 | 124842833 | 1  | GCAGAAAGCGAAGCTGTTATGACACTAGAAATGCTTTATTGATAGCTT        | Homo sapiens           |
| 1350521 scaffold   | scaffold_76  | 12954     | 13002     | 1  | AAGAAAGCGGGGCTGTTATGACACAGGAATGCTTTATTGATGGTCT          | Takifugu rubripes      |
| 1350521 chromosome | 7q           | 835035    | 835082    | 1  | AAGCAGGCGGAGCTGTCAGGACACCGTGAAGTTTATTGACGGTTT           | Ciona intestinalis     |
| 1350521 group      | groupVI      | 11858194  | 11858242  | -1 | AGGAAAGCGGAGCTGTTATGACACAGAAATGCTTTATTGATGGTCT          | Gasterosteus aculeatus |
| 1350521 chromosome | 15           | 18106550  | 18106598  | 1  | AGGAAAGCGGAGCTGTTATGACACAGAAATGCTTTATTGATGGTCT          | Oryzias latipes        |
| 1350521 toplevel   | 17           | 23310692  | 23310737  | 1  | AAAAGCGCTGCTGTTATGACACAGAAATGCTTTATTGATGGTCT            | Danio rerio            |
| 1350521 chromosome | 7            | 138641154 | 138641202 | 1  | GCAGAAAGCGAAGCTGTTATGACACTAGAAATGCTTTATTGATAGCTT        | Mus musculus           |
| 1354250 reftig     | refitg_37    | 1576368   | 1576415   | -1 | CATCTCATGTGTTGTTATTTACTAATCTGTTAAATTTATTTTTTGC          | Ciona savignyi         |
| 1354250 chromosome | 14           | 46790627  | 46790672  | 1  | CAGCTTGATGAGCGCTGGTGTAAATTTGCTCATTACATTCTGC             | Canis familiaris       |
| 1354250 chromosome | 7            | 31241176  | 31241221  | 1  | CAGCTTGATGAGCGCTGGTGTAAATTTGCTCATTACATTCTGC             | Homo sapiens           |
| 1354250 scaffold   | scaffold_80  | 807863    | 807910    | -1 | CAGCTTGATGAGCGCTGGTGTAAATTTGCTCATTACATTCTGC             | Takifugu rubripes      |
| 1354250 chromosome | 10q          | 3285648   | 3285695   | -1 | CATCTCATGTGTTGTTATTTACTAATCTGTTAAATTTACTTTTTGC          | Ciona intestinalis     |
| 1354250 group      | groupIII     | 13097907  | 13097954  | -1 | CAGCTTGATGAGCGCTGGTGTAAATTTGCTCATTACATTCTGC             | Gasterosteus aculeatus |
| 1354250 chromosome | 17           | 30337117  | 30337164  | 1  | CAGCTTGATGAGCGCTGGTGTAAATTTGCTCATTACATTCTGC             | Oryzias latipes        |
| 1354250 toplevel   | 24           | 30905815  | 30905856  | 1  | GCTTGATGAGCGCTGGGCAATTAACACTCTCATTACATTCTGC             | Danio rerio            |
| 1354250 chromosome | 6            | 55529803  | 55529848  | 1  | CAGCTTGATGAGCGCTGGTGTAAATTTGCTCATTACATTCTGC             | Mus musculus           |
| 1350641 reftig     | refitg_281   | 63299     | 63343     | -1 | ACTAGTTTAAATTAATAGTGAAGGGGACGGCTGATATGACTTTTG           | Ciona savignyi         |
| 1350641 chromosome | 21           | 34974184  | 34974225  | 1  | AAACAGCTAATTAATAATGACACAGTTCCTAATTAAGTCTCTTG            | Canis familiaris       |
| 1350641 chromosome | 11           | 8261492   | 8261533   | 1  | AAACAGCTAATTAATAATGACACAGTTCCTAATTAAGTCTCTTG            | Homo sapiens           |
| 1350641 scaffold   | scaffold_14  | 107585    | 107626    | 1  | AAACAGCTAATTAATAATGACACAGTTCCTAATTAAGTCTCTTG            | Takifugu rubripes      |
| 1350641 chromosome | 1q           | 3817791   | 3817832   | -1 | AAACAGCTAATTAATAATGAGCGGAGTGGTTTGTACTTTTG               | Ciona intestinalis     |
| 1350641 group      | groupII      | 9881032   | 9881073   | 1  | AAACAGCTAATTAATAATGACACAGTTCCTAATTAAGTCTCTTG            | Gasterosteus aculeatus |
| 1350641 chromosome | 3            | 18032048  | 18032089  | 1  | AAACAGCTAATTAATAATGACACAGTTCCTAATTAAGTCTCTTG            | Oryzias latipes        |
| 1350641 toplevel   | 7            | 23643819  | 23643860  | -1 | AAACAGCTAATTAATAATGACACAGTTCCTAATTAAGTCTCTTG            | Danio rerio            |
| 1350641 chromosome | 7            | 116335097 | 116335138 | 1  | AAACAGCTAATTAATAATGACACAGTTCCTAATTAAGTCTCTTG            | Mus musculus           |
| 1352078 reftig     | refitg_1     | 2388734   | 2388775   | 1  | CTGCAAGTGTTCCTCTCTCTTTGGGCTAATTTGGCCGT                  | Ciona savignyi         |
| 1352078 chromosome | 5            | 49869341  | 49869383  | -1 | GTGGAATGTTCAATCAGTCTCTCTGTTGGAAAGTTAGGTCAT              | Canis familiaris       |
| 1352078 chromosome | 1            | 63513280  | 63513322  | 1  | GTGGAATGTTCAATCAGTCTCTCTGTTGGAAAGTTAGGTCAT              | Homo sapiens           |
| 1352078 scaffold   | scaffold_55  | 1001151   | 1001194   | 1  | TTGAAAGTGTTCATCAGCCTCTCTGTTGGAAAGTTAGGTCAT              | Takifugu rubripes      |
| 1352078 chromosome | 3p           | 1214858   | 1214898   | 1  | TTGCAAGTGTTCCTCTCTCTGTTGGCTAATTTAGCCGT                  | Ciona intestinalis     |
| 1352078 group      | groupVIII    | 7693293   | 7693336   | 1  | TTGAAAGTGTTCATCAGCCTCTCTGTTGGAAAGTTAGGTCAT              | Gasterosteus aculeatus |
| 1352078 chromosome | 4            | 17178575  | 17178616  | -1 | TTGAAAGTGTTCATCAGCCTCTCTGTTGGAAAGTTAGGTCAT              | Oryzias latipes        |
| 1352078 toplevel   | 6            | 17362409  | 17362443  | -1 | TTCAATCAGCCATCTCTGTTGGAAAGTTAGGTCAT                     | Danio rerio            |



|         |            |              |           |           |    |                                                  |                        |
|---------|------------|--------------|-----------|-----------|----|--------------------------------------------------|------------------------|
| 1352078 | chromosome | 4            | 99291517  | 99291559  | 1  | GTGGAATGTTCAATCAGTCTCTCGTGGGAAAGTTAGTTCAT        | Mus musculus           |
| 1350509 | reflig     | reflig_1398  | 49458     | 49506     | 1  | GCAGGTCTACGAATAATAATTTTTATTACGACCTAACGCTGCCAAAT  | Ciona savignyi         |
| 1350509 | chromosome | 24           | 4030314   | 4030363   | -1 | TCTCTCCCGGAGAAGTACGATTTTTTTTCGGCTCCAAGCTGTCAAAG  | Canis familiaris       |
| 1350509 | chromosome | 20           | 22491038  | 22491087  | 1  | TCTCTCCCGGAGAAGTACGATTTTTTTTCGGCTCCAAGCTGTCAAAG  | Homo sapiens           |
| 1350509 | scaffold   | scaffold_23  | 397511    | 397620    | 1  | GCCGTCCCGGAGAAGTACGATTTTTTTTCAGCTCCAAGCTGTCAAAG  | Takifugu rubripes      |
| 1350509 | chromosome | 4q           | 2982561   | 2982610   | 1  | GCAGGTCCAGAGGTAATAATTTTTATTACGACCTACCGTGTCCAAAG  | Ciona intestinalis     |
| 1350509 | chromosome | 22           | 16034567  | 16034616  | -1 | GCCGTCCCGGAGAAGTACGATTTTTTTTCAGCTCCAAGCTGTCAAAG  | Oryzias latipes        |
| 1350509 | group      | groupXV      | 3763410   | 3763459   | -1 | GCCGTCCCGGAGAAGTACGATTTTTTTTCAGCTCCAAGCTGTCAAAG  | Gasterosteus aculeatus |
| 1350509 | toplevel   | 17           | 43835184  | 43835233  | 1  | GCTGTCCCGGAGAAGTACGATTTTTGATTGGGCTCCAAGCTGTCAAAG | Danio rerio            |
| 1350509 | chromosome | 2            | 147849277 | 147849326 | 1  | CCTCTCCCGGAGAAGTACGATTTTTTTTCGGCTCCAAGCTGTCAAAG  | Mus musculus           |
| 1353043 | reflig     | reflig_9     | 2687423   | 2687464   | -1 | ACGTCTCAAGGGCGGATGTTTCTGTGTTTTTCAAAGGA           | Ciona savignyi         |
| 1353043 | chromosome | 21           | 42373604  | 42373643  | 1  | ACATGTCAGGAAGAATTAATTTCTCATTTTTCAAAGGA           | Canis familiaris       |
| 1353043 | chromosome | 11           | 16418398  | 16418437  | 1  | ACATGTCAGGAAGAATTAATTTCTCATTTTTCAAAGGA           | Homo sapiens           |
| 1353043 | scaffold   | scaffold_1   | 7074174   | 7074213   | -1 | ACATGTCAGGAAGAATTAATTTCTCATTTTTCAAAGGA           | Takifugu rubripes      |
| 1353043 | chromosome | 12q          | 1232583   | 1232624   | -1 | ACATCTCAAGAGCGATTAATTTCTGTGTTTTTCGAAAGCA         | Ciona intestinalis     |
| 1353043 | group      | groupII      | 9529667   | 9529706   | -1 | ACATGTCAGGAAGAATTAATTTCTCATTTTTCAAAGGA           | Gasterosteus aculeatus |
| 1353043 | chromosome | 3            | 17575150  | 17575189  | -1 | ACATGTCAGGAAGAATTAATTTCTCATTTTTCAAAGGA           | Oryzias latipes        |
| 1353043 | toplevel   | 7            | 18348817  | 18348856  | -1 | ACATGTCAGGAAGAATTAATTTCTCATTTTTCAAAGGA           | Danio rerio            |
| 1353043 | chromosome | 7            | 123048420 | 123048459 | 1  | ACATGTCAGGAAGAATTAATTTCTCATTTTTCAAAGGA           | Mus musculus           |
| 1353401 | reflig     | reflig_442   | 30988     | 31038     | -1 | AGCGCAAGCGAACAATAAAACCAGAGGCCCTTCGATCAATTTGGGAAC | Ciona savignyi         |
| 1353401 | chromosome | 9            | 55078440  | 55078486  | 1  | AGTGTAAAAGACCATAAAAAACAGCCATTTTGATTTAATGGAGGC    | Canis familiaris       |
| 1353401 | chromosome | 9            | 134421880 | 134421926 | -1 | AGTGTAAAAGACCATAAAAAACAGCCATTTTGATTTAATGGAGGC    | Homo sapiens           |
| 1353401 | scaffold   | scaffold_370 | 139872    | 139919    | 1  | AGCGCAAGAGACCATAAAAAACAGCCATTTTGATTTAATGGAGGC    | Takifugu rubripes      |
| 1353401 | chromosome | 4q           | 3157340   | 3157390   | 1  | AGCGCAAGTGAACAATAAAACCAGAGGCCCTTCGATCAATTTGGGAAC | Ciona intestinalis     |
| 1353401 | group      | groupXIV     | 11480608  | 11480655  | 1  | AGCGCAAGAGACCATAAAAAACAGCCATTTTGATTTAATGGAGGC    | Gasterosteus aculeatus |
| 1353401 | chromosome | 12           | 23386947  | 23386994  | -1 | AGCGCAAGAGACCATAAAAAACAGCCATTTTGATTTAATGGAGGC    | Oryzias latipes        |
| 1353401 | toplevel   | Zv7_NA1231   | 2678      | 2725      | 1  | AGCGCAAAACACCAATAAAAAACAGCCATTTTGATTTAATGGAGGC   | Danio rerio            |
| 1353401 | chromosome | 2            | 28799763  | 28799809  | 1  | AGCGTAAAAGACCATAAAAAACAGCCATTTTGATTTAATGGAGGC    | Mus musculus           |
| 1352459 | reflig     | reflig_44    | 406049    | 406091    | -1 | TGCAATCTCCAATCGAAGGTCATTAAGTTGCGATTACGGTTT       | Ciona savignyi         |
| 1352459 | chromosome | 20           | 23764386  | 23764430  | -1 | AGCAATCCCAACTGATTAGGGTCATTATGTTGGAGTCTGATT       | Canis familiaris       |
| 1352459 | chromosome | 3            | 71360446  | 71360490  | 1  | AGCAATCCCAACTGATTAGGGTCATTATGTTGGAGTCTGATT       | Homo sapiens           |
| 1352459 | scaffold   | scaffold_150 | 645195    | 645239    | 1  | TGCAATCCCAACTGATTAGGGTCATTATGTTGGGGCCTGATT       | Takifugu rubripes      |
| 1352459 | chromosome | 10p          | 1051647   | 1051688   | 1  | TGCAATCCCAACTCGAAGGTCATTAAGTTGATTATGATT          | Ciona intestinalis     |
| 1352459 | group      | groupXVII    | 13921134  | 13921178  | -1 | TGCAATCCCGACTGATTAGGGTCATTATGCTGGAGGCTGATT       | Gasterosteus aculeatus |
| 1352459 | chromosome | 5            | 4936916   | 4936960   | -1 | TGCAATCCCAACTGATTAGGGTCATTATGTTGGAGACCTGATT      | Oryzias latipes        |
| 1352459 | toplevel   | 6            | 30555542  | 30555586  | 1  | TGCAATCCCAAGCTGATTAGGGTCATTATGTTGAAACCTGATT      | Danio rerio            |
| 1352459 | chromosome | 6            | 99140100  | 99140144  | 1  | AGCAATCCCAACTGATTAGGGTCATTATGTTGGAGTCTGATT       | Mus musculus           |
| 1349895 | reflig     | reflig_19    | 1631855   | 1631891   | -1 | AGCCATTGTTGCAATGAATGTTTAAAAGTAGAGCTG             | Ciona savignyi         |
| 1349895 | chromosome | 14           | 58039598  | 58039638  | 1  | ACCCATTATTTGAGTCAATGAATGAAAGAAATAGGGCAA          | Canis familiaris       |
| 1349895 | chromosome | 7            | 115511206 | 115511246 | 1  | ACCCATTATTTGAGTCAATGAATGAAAGAAATAGGGCAA          | Homo sapiens           |
| 1349895 | scaffold   | scaffold_8   | 2912215   | 2912255   | -1 | ACCCATTATTTGAGTCAATGAATGAAAGAAATAGGGCAA          | Takifugu rubripes      |
| 1349895 | scaffold   | scaffold_165 | 50421     | 50460     | -1 | GCCCATTTTGGGAATGAATGATTAAAGTAGAAAGCCAA           | Ciona intestinalis     |
| 1349895 | group      | groupIV      | 18850244  | 18850284  | -1 | ACCCATTATTTGAGTCAATGAATGAAAGAAATAGGGCAA          | Gasterosteus aculeatus |
| 1349895 | chromosome | 23           | 4097243   | 4097283   | -1 | ACCCATTATTTGAGTCAATGAATGAAAGAAATAGGGCAA          | Oryzias latipes        |
| 1349895 | toplevel   | 4            | 4555329   | 4555365   | -1 | ACCCATTATTTGAGTCAATGAATGAAAGAAATGGG              | Danio rerio            |
| 1349895 | chromosome | 6            | 16892609  | 16892649  | 1  | ACCCATTATTTGAGTCAATGAATGAAAGAAATGGGGCAA          | Mus musculus           |
| 1352581 | reflig     | reflig_51    | 560857    | 560897    | -1 | GCATTAGACTATTCAATATCCGCGCATGATTATCTGTCT          | Ciona savignyi         |
| 1352581 | chromosome | 22           | 48663316  | 48663356  | 1  | CCTATTATGCTATTGATTACCTCTGAATCAATTTCTTT           | Canis familiaris       |
| 1352581 | chromosome | 13           | 94417031  | 94417071  | 1  | CCTATTATGCTATTGATTACCTCTGAATCAATTTCTTT           | Homo sapiens           |
| 1352581 | scaffold   | scaffold_103 | 116966    | 117006    | -1 | CCTATTATGCTATTGATTACCTCTGAATCAATTTCTTT           | Takifugu rubripes      |
| 1352581 | chromosome | 1p           | 3888638   | 3888678   | 1  | CCATTAGACTATTCAATATCCAGAATTGATTTCCTGCTT          | Ciona intestinalis     |
| 1352581 | group      | groupXVI     | 9268832   | 9268872   | 1  | CCATTATGCTATTGATTACCTCTGAATCAATTTCTTT            | Gasterosteus aculeatus |
| 1352581 | chromosome | 21           | 25474720  | 25474760  | -1 | CCATTATGCTATTGATTACCTCTGAATCAATTTCTTT            | Oryzias latipes        |
| 1352581 | toplevel   | 14           | 24022963  | 2403002   | -1 | CCATTATGCTATTGATTACCTCTGAATCAATTTCTTT            | Danio rerio            |
| 1352581 | chromosome | 14           | 118835259 | 118835299 | 1  | CCTATTGCTATTGATTACCTCTGAATCAATTTCTTT             | Mus musculus           |
| 1354063 | reflig     | reflig_27    | 1807239   | 1807280   | 1  | TTTTCCATTCATCCCGAAATTCGATACCAGCAAAAGGAT          | Ciona savignyi         |
| 1354063 | chromosome | 23           | 54812057  | 54812098  | 1  | TTTATTCATTCAGCAACCTGATATCTTTCCCAATAACAAAT        | Canis familiaris       |
| 1354063 | chromosome | 3            | 159586264 | 159586305 | 1  | TTTATTCATTCAGCAACCTGATATCTTTCCCAATAACAAAT        | Homo sapiens           |
| 1354063 | scaffold   | scaffold_9   | 1559686   | 1559727   | 1  | TTTTCCATTCACACACCTGATATCTTTCCCAATAACAAAT         | Takifugu rubripes      |
| 1354063 | chromosome | 1q           | 4868349   | 4868390   | 1  | TTTTCCATTCATTCCTGAAATTTTGATACACATAACGGAT         | Ciona intestinalis     |
| 1354063 | group      | groupI       | 8743966   | 8744007   | -1 | TTTTCCATTCACACACCTGATATCTTTCCCAATAACAAAT         | Gasterosteus aculeatus |
| 1354063 | chromosome | 13           | 14853708  | 14853749  | 1  | TTTTCCATTCACACACCTGATATCTTTCCCAATAACAAAT         | Oryzias latipes        |
| 1354063 | toplevel   | 15           | 1703998   | 1704034   | 1  | CTTATTCAGAACCTGATATCTTTCCCAATAACAAAT             | Danio rerio            |
| 1354063 | chromosome | 3            | 67025697  | 67025738  | 1  | TTTATTCATTCAGCAACCTGATATCTTTCCCAATAACAAAT        | Mus musculus           |
| 1351455 | reflig     | reflig_37    | 779903    | 779944    | 1  | CGCTTGAGTGATTAATAATGATGAGAAATACACGTGTGCA         | Ciona savignyi         |
| 1351455 | chromosome | 18           | 10957628  | 10957669  | 1  | CAGGCCCTGAAATGAAATATTCAGTCATACCAATATTGCA         | Canis familiaris       |
| 1351455 | chromosome | 7            | 42069017  | 42069058  | -1 | CAGGCACCTGAAATGAAATATTCAGTCATACCAATATTGCA        | Homo sapiens           |
| 1351455 | scaffold   | scaffold_210 | 267537    | 267578    | 1  | CAGTCACCTGAAATGAAATATTCAGTCATACCAATATTGCA        | Takifugu rubripes      |
| 1351455 | chromosome | 10q          | 2874004   | 2874045   | 1  | CGGTGAGTGAATAAAAAATGCAATGATGACACGTGTGCA          | Ciona intestinalis     |
| 1351455 | chromosome | 20           | 20093330  | 20093371  | 1  | CAGTCACCTGAAATGAAATATTCAGTCATACCAATATTGCA        | Oryzias latipes        |
| 1351455 | group      | groupXXI     | 10302411  | 10302452  | 1  | CAGTCACCTGAAATGAAATATTCAGTCATACCAATATTGCA        | Gasterosteus aculeatus |
| 1351455 | toplevel   | 24           | 8043918   | 8043959   | 1  | CAGTCACCTGAAATGAAATATTCAGTCATACCAATATTGCA        | Danio rerio            |
| 1351455 | chromosome | 13           | 15719956  | 15719997  | 1  | CAGGCACCTGAAATGAAATATTCAGTCATACCAATATTGCA        | Mus musculus           |
| 1351796 | reflig     | reflig_19    | 4546288   | 4546330   | -1 | ACCGTATGGCAATCAAAATTCGAGCAATAGGTTCCCGGTG         | Ciona savignyi         |
| 1351796 | chromosome | 8            | 38468231  | 38468273  | 1  | ATTATGATGCTAATCTCAATACAGCAATGTTTCTCTGTG          | Canis familiaris       |
| 1351796 | chromosome | 14           | 59893305  | 59893347  | 1  | ATTATGATGCTAATCTCAATACAGCAATGTTTCTCTGTG          | Homo sapiens           |
| 1351796 | scaffold   | scaffold_88  | 448826    | 448868    | 1  | ATTATGATGCTAATCTCAATACAGCAATGTTTCTCTGTG          | Takifugu rubripes      |
| 1351796 | chromosome | 2q           | 5709046   | 5709088   | -1 | ACCATGATGGCAATCAAAATTCAGCAATAGGTTCCCGGTG         | Ciona intestinalis     |
| 1351796 | group      | groupXV      | 5684201   | 5684243   | 1  | ATTATGATGCTAATCTCAATACAGCAATGTTTCTCTGTG          | Gasterosteus aculeatus |
| 1351796 | chromosome | 22           | 11736985  | 11737027  | -1 | ATTATGATGCTAATCTCAATACAGCAATGTTTCTCTGTG          | Oryzias latipes        |
| 1351796 | toplevel   | 20           | 22443751  | 22443792  | 1  | ATTATGATGCTAATCTCAATACAGCAATGTTTCTCTGTG          | Danio rerio            |
| 1351796 | chromosome | 12           | 73955377  | 73955419  | 1  | ATTATGATGCTAATCTCAATACAGCAATGTTTCTCTGTG          | Mus musculus           |
| 1349840 | reflig     | reflig_19    | 4171779   | 4171822   | 1  | ACGGAACAATGATGACAGATCTGTTTCTGATTAGAAACAT         | Ciona savignyi         |
| 1349840 | chromosome | 28           | 35856826  | 35856869  | 1  | ACCATATTGATGCTAGATGTTATTATGGGTGATTACAAACAA       | Canis familiaris       |
| 1349840 | chromosome | 10           | 125098931 | 125098974 | 1  | ACCATATTGATGCTAGATGTTATTATGGGTGATTACAAACAA       | Homo sapiens           |
| 1349840 | scaffold   | scaffold_76  | 45436     | 45479     | 1  | ACCATACTGATGCTGGATGTTATTATGGGTGATTACAAACAA       | Takifugu rubripes      |
| 1349840 | chromosome | 2q           | 296974    | 297017    | 1  | ACTGAACAGTACTGAATACTATTGTTCTGATTATAAAACAT        | Ciona intestinalis     |
| 1349840 | group      | groupVI      | 11810008  | 11810051  | -1 | ACCATACTGATGCTGGATGTTATTATGGGTGATTACAAACAA       | Gasterosteus aculeatus |
| 1349840 | chromosome | 15           | 18166911  | 18166954  | 1  | ACCATACTGATGCTGGATGTTATTATGGGTGATTACAAACAA       | Oryzias latipes        |
| 1349840 | toplevel   | 17           | 23393306  | 23393349  | 1  | ACCATACTGATGCTAGATGTTATTATGGGTGATTACAAACAA       | Danio rerio            |

|         |            |              |           |           |    |                                                     |                        |
|---------|------------|--------------|-----------|-----------|----|-----------------------------------------------------|------------------------|
| 1349840 | chromosome | 7            | 138904889 | 138904932 | 1  | ACCATATTGATGCTAGATGTTTATTGGGTGATTATCAAAACAA         | Mus musculus           |
| 1352890 | reflig     | 16           | 1755769   | 1755818   | -1 | ATTTTCACAGCAATTTAAGTCGATTATTTCAAAAACCTATGATAACCG    | Ciona savignyi         |
| 1352890 | chromosome | 36           | 2083827   | 2083876   | 1  | GTTTTATAAAGCTTCAGTCAATTTATTTATTTTCTAATGAAGAGCA      | Canis familiaris       |
| 1352890 | chromosome | 2            | 174226402 | 174226451 | 1  | GTTTTATAAAGCTTCAGTCAATTTATTTATTTTCTAATGAAGAGCA      | Homo sapiens           |
| 1352890 | scaffold   | scaffold_100 | 578408    | 578457    | -1 | GTTTTACAGAGCTGCAGTCAATTTATTTATTTTCTAATGAAGAGCA      | Takifugu rubripes      |
| 1352890 | scaffold   | scaffold_47  | 801565    | 801613    | 1  | ATTTTCACAGCAATTTAAGTCGTTTATTTCAAAAACCTATGATCAGCA    | Ciona intestinalis     |
| 1352890 | group      | groupXVI     | 10063392  | 10063441  | -1 | GTTTTCATAGAGCTGCAGTCAATTTATTTATTTTCTAATGAAGAGCA     | Gasterosteus aculeatus |
| 1352890 | chromosome | 21           | 24248208  | 24248257  | 1  | GTTTTCATAGAGCTGCAGTCAATTTATTTATTTTCTAATGAAGAGCA     | Oryzias latipes        |
| 1352890 | toplevel   | 9            | 3567343   | 3567392   | 1  | GTTTTCATAGAGCTGCAGTCAATTTATTTATTTTCTAATGAAGAGCA     | Danio rerio            |
| 1352890 | chromosome | 2            | 72546377  | 72546426  | 1  | GTTTTATAAAGCTTCAGTCAATTTATTTATTTTCTAATGAAGAGCA      | Mus musculus           |
| 1349788 | reflig     | reflig_140   | 599562    | 599601    | 1  | AATCAAAATTGTAGCAATAGGTCGGTTTCTACTTAAGA              | Ciona savignyi         |
| 1349788 | chromosome | 34           | 13755116  | 13755158  | 1  | TGTAAGATTGTAATTAACAAGCTTCGTTGGTTTGTCTACTTATCA       | Canis familiaris       |
| 1349788 | chromosome | 5            | 2165797   | 2165839   | -1 | TGTAAGATTGTAATTAACAAGCTTCGTTGGTTTGTCTACTTATCA       | Homo sapiens           |
| 1349788 | scaffold   | scaffold_22  | 324242    | 324284    | -1 | TGTAAGATTGTAATTAACAAGCTTCGTTGGTTTGTCTACTTATCG       | Takifugu rubripes      |
| 1349788 | chromosome | 9q           | 2651972   | 2652012   | 1  | TATCAAAATTGTAGTATTAGCTACGGTTTCTACTTAACG             | Ciona intestinalis     |
| 1349788 | group      | groupXX      | 6765725   | 6765767   | -1 | TGTAAGATTGTAATTAACAAGCTTCGTTGGTTTGTCTACTTATCG       | Gasterosteus aculeatus |
| 1349788 | chromosome | 16           | 8806192   | 8806234   | 1  | TGTAAGATTGTAATTAACAAGCTTCGTTGGTTTGTCTACTTATCG       | Oryzias latipes        |
| 1349788 | toplevel   | 16           | 15191609  | 15191651  | 1  | TGTAAGATTGTAATTAACAAGCTTCGTTGGTTTGTCTACTTATCG       | Danio rerio            |
| 1349788 | chromosome | 13           | 73254662  | 73254704  | 1  | TGTAAGATTGTAATTAACAAGCTTCGTTGGTTTGTCTACTTATCA       | Mus musculus           |
| 1351415 | reflig     | reflig_1     | 2384555   | 2384600   | -1 | TGTGAGACACATAGAGGTTGTTGGTCTGTTGATTGGGTCATTG         | Ciona savignyi         |
| 1351415 | chromosome | 2            | 67434669  | 67434712  | -1 | TGTCAGAACCATTTAAATGATTAGAGTTAAATTAATCAATG           | Canis familiaris       |
| 1351415 | chromosome | 16           | 49406584  | 49406627  | 1  | TGTCAGAACCATTTAAATGATTAGAGTTAAATTAATCAATG           | Homo sapiens           |
| 1351415 | scaffold   | scaffold_28  | 636778    | 636821    | 1  | TGTCAGAACCATTTAAATGATTGGTGGTTAAATGAATCAATG          | Takifugu rubripes      |
| 1351415 | chromosome | 3p           | 1210514   | 1210558   | -1 | TGTGAGACACCTCAGTATTGATTGGTGGTTGTTGATCGTCATTG        | Ciona intestinalis     |
| 1351415 | chromosome | 3            | 29411034  | 29411077  | -1 | TGTCAGAACCCTTGAATGATTGGTGGTTAAATGAATCAATG           | Oryzias latipes        |
| 1351415 | group      | groupII      | 17841812  | 17841855  | -1 | TGTCAGAACCCTTGAATGATTGGTGGTTAAATGAATCAATG           | Gasterosteus aculeatus |
| 1351415 | toplevel   | 7            | 25949764  | 25949807  | 1  | TGTCAGAACCCTTGAATGATTGGTGGTTAAATGAATCAATG           | Danio rerio            |
| 1351415 | chromosome | 8            | 91282513  | 91282556  | 1  | TGTCAGAACCCTTGAATGATTAGAGTTAAATTAATCAATG            | Mus musculus           |
| 1350078 | reflig     | reflig_13    | 1886336   | 1886392   | 1  | CGTATGCAATTAATAAAGATTGCATAAATAAATGAGGTCAGGTCATTATTA | Ciona savignyi         |
| 1350078 | chromosome | 36           | 22568347  | 22568402  | 1  | GCTTATGCAAGTAATAAATTAACCTCCATTACACTTTGTGTTACTTCTTAA | Canis familiaris       |
| 1350078 | chromosome | 2            | 176259820 | 176259875 | 1  | GCTTATGCAAGTAATAAATTAACCTCCATTACACTTTGTGTTACTTCTTAA | Homo sapiens           |
| 1350078 | scaffold   | scaffold_100 | 413208    | 413263    | -1 | GCTTATGCAAGTAATAAATTAACCTCCATTACACTTTGTGTTACTTCTTAA | Takifugu rubripes      |
| 1350078 | scaffold   | scaffold_78  | 503963    | 504018    | -1 | GCTTATGCAAGTAATAAATTAACCTCCATTACACTTTGTGTTACTTCTTAA | Ciona intestinalis     |
| 1350078 | group      | groupXVI     | 9873778   | 9873833   | -1 | GCTTATGCAAGTAATAAATTAACCTCCATTACACTTTGTGTTACTTCTTAA | Gasterosteus aculeatus |
| 1350078 | chromosome | 21           | 24507871  | 24507926  | 1  | GCTTATGCAAGTAATAAATTAACCTCCATTACACTTTGTGTTACTTCTTAA | Oryzias latipes        |
| 1350078 | toplevel   | 9            | 2108397   | 2108452   | -1 | GCTTATGCAAGTAATAAATTAACCTCCATTACACTTTGTGTTACTTCTTAA | Danio rerio            |
| 1350078 | chromosome | 2            | 74135161  | 74135216  | 1  | GCTTATGCAAGTAATAAATTAACCTCCATTACACTTTGTGTTACTTCTTAA | Mus musculus           |
| 1352850 | reflig     | reflig_0     | 1542740   | 1542781   | -1 | GGAAGGATAAATGCTTCTTTCTCATTAAAATTTGAATT              | Ciona savignyi         |
| 1352850 | chromosome | 14           | 56795951  | 56795994  | 1  | GCATGCATAATAAACTGCTCATTGTCTAATAATTAATAAAT           | Canis familiaris       |
| 1352850 | chromosome | 7            | 114088225 | 114088268 | 1  | GCATGCATAATAAACTGCTCATTGTCTAATAATTAATAAAT           | Homo sapiens           |
| 1352850 | scaffold   | scaffold_8   | 3086025   | 3086068   | -1 | GCATGCATAATAAACTGCTCATTGTCTAATAATTAATAAAT           | Takifugu rubripes      |
| 1352850 | chromosome | 10q          | 2074152   | 2074196   | 1  | GCAAGTATAATAAATTAATGATCCTTCGCTCATTAAAATTTGAATT      | Ciona intestinalis     |
| 1352850 | group      | groupIV      | 19051017  | 19051060  | -1 | GCATGCATAATAAACTGCTCATTGTCTAATAATTAATAAAT           | Gasterosteus aculeatus |
| 1352850 | chromosome | 23           | 4508793   | 4508836   | -1 | GCATGCATAATAAACTGCTCATTGTCTAATAATTAATAAAT           | Oryzias latipes        |
| 1352850 | toplevel   | 4            | 40363392  | 40363435  | 1  | GCATGCATAATAAACTGCTCATTGTCTAATAATTAATAAAT           | Danio rerio            |
| 1352850 | chromosome | 6            | 15362637  | 15362680  | 1  | GCATGCATAATAAACTGCTCATTGTCTAATAATTAATAAAT           | Mus musculus           |
| 1351498 | reflig     | reflig_54    | 608934    | 608981    | 1  | TGGCTATTGACGCTCAATAATCGCTTAGTTACAGCAGCAACGCA        | Ciona savignyi         |
| 1351498 | chromosome | 1            | 84620005  | 84620054  | 1  | TGACTAATTACATAAATTAATCTCATTAAATTTACAGCACATCAATATAAA | Canis familiaris       |
| 1351498 | chromosome | 9            | 78817732  | 78817781  | -1 | TGACTAATTACATAAATTAATCTCATTAAATTTACAGCACATCAATATAAA | Homo sapiens           |
| 1351498 | scaffold   | scaffold_11  | 32709     | 32758     | -1 | TGACTAATTACATAAATTAATCTCATTAAATTTACAGCACATCAATATAAA | Takifugu rubripes      |
| 1351498 | chromosome | 12q          | 1876129   | 1876178   | -1 | TGGCTATTACGCTCAATAAATCGCTAGTTACAGCAGCTCGACGCAAA     | Ciona intestinalis     |
| 1351498 | chromosome | 9            | 11248905  | 11248954  | 1  | TGACTAATTACATAAATTAATCTCATTAAATTTACAGCACATCAATATAAA | Oryzias latipes        |
| 1351498 | group      | groupXIII    | 8011765   | 8011814   | 1  | TGACTAATTACATAAATTAATCTCATTAAATTTACAGCACATCAATATAAA | Gasterosteus aculeatus |
| 1351498 | toplevel   | 23           | 44469813  | 44469862  | 1  | TGACTAATTACATAAATTAATCTCATTAAATTTACAGCACATCAATATAAA | Danio rerio            |
| 1351498 | chromosome | 19           | 16954333  | 16954382  | 1  | TGACTAATTACATAAATTAATCTCATTAAATTTACAGCACATCAATATAAA | Mus musculus           |
| 1350225 | reflig     | reflig_60    | 320895    | 320938    | -1 | TCTGTAGCAGTGAGCTGATTATACACGTTAAAAGTTGTTACCG         | Ciona savignyi         |
| 1350225 | chromosome | 12           | 13260110  | 13260152  | -1 | TTTGCATGCTTGAGATTATATGCAATTTGAAAAGTCAATTCGCG        | Canis familiaris       |
| 1350225 | chromosome | 6            | 41638055  | 41638097  | -1 | TTTGCATGCTTGAGATTATATGCAATTTGAAAAGTCAATTCGCG        | Homo sapiens           |
| 1350225 | scaffold   | scaffold_79  | 142417    | 142459    | 1  | TTTGCATGCTTGAGATTATATGCAATTTGAAAAGTCAATTCGCG        | Takifugu rubripes      |
| 1350225 | chromosome | 5q           | 5655761   | 5655804   | -1 | TTTGCATGCTTGAGATTATATGCAATTTGAAAAGTCAATTCGCG        | Ciona intestinalis     |
| 1350225 | chromosome | 5            | 28991792  | 28991834  | -1 | TTTGCATGCTTGAGATTATATGCAATTTGAAAAGTCAATTCGCG        | Oryzias latipes        |
| 1350225 | scaffold   | scaffold_27  | 474552    | 474594    | 1  | TTTGCATGCTTGAGATTATATGCAATTTGAAAAGTCAATTCGCG        | Gasterosteus aculeatus |
| 1350225 | toplevel   | 11           | 19748804  | 19748846  | 1  | TTTGCATGCTTGAGATTATATGCAATTTGAAAAGTCAATTCGCG        | Danio rerio            |
| 1350225 | chromosome | 17           | 48044904  | 48044946  | 1  | TTTGCATGCTTGAGATTATATGCAATTTGAAAAGTCAATTCGCG        | Mus musculus           |
| 1351292 | reflig     | reflig_49    | 2528319   | 2528364   | -1 | GTAATCCAATTTGAAGTATGATGCAAGAAAGTATTCCTGGGACA        | Ciona savignyi         |
| 1351292 | chromosome | 20           | 23876683  | 23876725  | -1 | GCAATCCAATTTGAAGTATGATGCAAGAAAGTATTCCTGGGACA        | Canis familiaris       |
| 1351292 | chromosome | 3            | 71237176  | 71237218  | 1  | GCAATCCAATTTGAAGTATGATGCAAGAAAGTATTCCTGGGACA        | Homo sapiens           |
| 1351292 | scaffold   | scaffold_150 | 614694    | 614736    | 1  | GCAATCCAATTTGAAGTATGATGCAAGAAAGTATTCCTGGGACA        | Takifugu rubripes      |
| 1351292 | chromosome | 14p          | 2196833   | 2196875   | -1 | GTAATCCAATTTGAAGTATGATGCAAGAAAGTATTCCTGGGACA        | Ciona intestinalis     |
| 1351292 | group      | groupXVII    | 13952200  | 13952242  | -1 | GCAATCCAATTTGAAGTATGATGCAAGAAAGTATTCCTGGGACA        | Gasterosteus aculeatus |
| 1351292 | chromosome | 5            | 4978893   | 4978935   | -1 | GCAATCCAATTTGAAGTATGATGCAAGAAAGTATTCCTGGGACA        | Oryzias latipes        |
| 1351292 | toplevel   | 6            | 30476495  | 30476537  | 1  | GCAATCCAATTTGAAGTATGATGCAAGAAAGTATTCCTGGGACA        | Danio rerio            |
| 1351292 | chromosome | 6            | 99018096  | 99018138  | 1  | GCAATCCAATTTGAAGTATGATGCAAGAAAGTATTCCTGGGACA        | Mus musculus           |
| 1354042 | reflig     | reflig_1     | 2897205   | 2897247   | 1  | AACAATGTTTTGTTTGGATGGATGTTATCTGTTTGGTTCCG           | Ciona savignyi         |
| 1354042 | chromosome | 4            | 29078477  | 29078519  | 1  | AGCAAAGGGCCGCTGACAGGGATTATTTATTTTGTGCATC            | Canis familiaris       |
| 1354042 | chromosome | 10           | 77137866  | 77137908  | 1  | AGCAAAGGGCCGCTGACAGGGATTATTTATTTTGTGCATC            | Homo sapiens           |
| 1354042 | scaffold   | scaffold_59  | 1359246   | 1359288   | -1 | AGCAAAGGGCCGCTGCTGACAGGGATTATTTATTTTGTGCATG         | Takifugu rubripes      |
| 1354042 | chromosome | 3q           | 3293648   | 3293690   | -1 | AACAATGTTTTGTTTGGATGGATGTTATCTGTTTGGTTCCG           | Ciona intestinalis     |
| 1354042 | group      | groupV       | 369916    | 369958    | 1  | AGCAAAGGGCCGCTGCTGACAGGGATTATTTATTTTGTGCATG         | Gasterosteus aculeatus |
| 1354042 | chromosome | 19           | 9307765   | 9307807   | 1  | AGCAAAGGGCCGCTGCTGACAGGGATTATTTATTTTGTGCATG         | Oryzias latipes        |
| 1354042 | toplevel   | 13           | 15193233  | 15193275  | 1  | AGCAAAGGGCCGCTGTTGACAGGCATTATTTATTTTGTGCATG         | Danio rerio            |
| 1354042 | chromosome | 14           | 23074769  | 23074811  | 1  | AGCAAAGGGCCGCTGCTGACAGGGATTATTTATTTTGTGCATG         | Mus musculus           |
| 1353736 | reflig     | reflig_281   | 132878    | 132916    | -1 | ATCTCAATCTATGATTTTGAATTTCTACTGTTGGTTGA              | Ciona savignyi         |
| 1353736 | chromosome | 28           | 35682299  | 35682336  | 1  | ATTTTAAATGTGTTTTAATTTGACATATAGTTGCAGA               | Canis familiaris       |
| 1353736 | chromosome | 10           | 124893498 | 124893535 | 1  | ATTTTAAATGTGTTTTAATTTGACATATAGTTGCAGA               | Homo sapiens           |
| 1353736 | scaffold   | scaffold_76  | 20469     | 20506     | 1  | ATTTTAAATGTGTTTTAATTTGACATATAGTTGCCTG               | Takifugu rubripes      |
| 1353736 | chromosome | 3p           | 4035825   | 4035864   | -1 | ATCTCAATGAGTATTTGATTTGCTAGTGTGTTGTTG                | Ciona intestinalis     |
| 1353736 | group      | groupVI      | 11848442  | 11848479  | -1 | ATTTTAAATGTGTTTTAATTTGACATATAGTTGCCTG               | Gasterosteus aculeatus |
| 1353736 | chromosome | 15           | 18115544  | 18115581  | 1  | ATTTTAAATGTGTTTTAATTTGACATATAGTTGCCTG               | Oryzias latipes        |
| 1353736 | toplevel   | 17           | 23321135  | 23321169  | 1  | ATTTTAAATGTGTTTTAATTTGACATATAGTTGC                  | Danio rerio            |

|                    |             |           |           |    |                                                 |                        |
|--------------------|-------------|-----------|-----------|----|-------------------------------------------------|------------------------|
| 1353736 chromosome | 7           | 138693744 | 138693781 | 1  | ATTTAATTGTGTTTTTAATTGGACATATAGTTGCAGA           | Mus musculus           |
| 1352277 reftig     | reftig_14   | 1107154   | 1107198   | 1  | CGGAGGAGTGAGTAATAGTTTATGACTAGAAGGAAGCCATGCGTT   | Ciona savignyi         |
| 1352277 chromosome | 30          | 28343609  | 28343652  | -1 | AAGTGGAAAGTGGGTATGTTAATGAACGTAGGAATCAATTCATT    | Canis familiaris       |
| 1352277 chromosome | 15          | 58604935  | 58604978  | -1 | AAGTGGAAAGTGGGTATGTTAATGAACGTAGGAATCAATTCATT    | Homo sapiens           |
| 1352277 scaffold   | scaffold_2  | 740416    | 740459    | 1  | CAGTAGAGTGGGGCATGTTAATGATGTGCTGGAATCAATTCATT    | Takifugu rubripes      |
| 1352277 chromosome | 1q          | 1042792   | 1042836   | 1  | CAGGCGAGTGAGTAATAGTTTATGACGAAACGGAATCCATGCGTT   | Ciona intestinalis     |
| 1352277 group      | groupXIX    | 12394608  | 12394651  | 1  | CAGAAGAGTGGGGCATGTTAATGATGTGCTGGAATCGATTCATT    | Gasterosteus aculeatus |
| 1352277 chromosome | 6           | 12122767  | 12122810  | -1 | CAGTAGAGTGGGGCATGTTAATGATGTGCTGGAATCAATTCATT    | Oryzias latipes        |
| 1352277 toplevel   | 25          | 28188967  | 28189008  | -1 | GTGGAGTGGGGTGTGTTAATGACGAGCTGGAATCAATTCATT      | Danio rerio            |
| 1352277 chromosome | 9           | 69202316  | 69202359  | 1  | AAGTGGAAAGTGGGTATGTTAATGAACGTAGGAATCAATTCATT    | Mus musculus           |
| 1350269 reftig     | reftig_283  | 91361     | 91406     | 1  | AGCATGTATTGTGACATCAACAATAGCATGATTGATGAAAACAAA   | Ciona savignyi         |
| 1350269 chromosome | 4           | 28725977  | 28726023  | 1  | ATCTAATTTTGGAAACATGAAAAACAGCACGTTTGTCTTGAAGAAAA | Canis familiaris       |
| 1350269 chromosome | 10          | 76725254  | 76725300  | 1  | ATCTAATTTTGGAAACATGAAAAACAGCACATTTGTCTTGAAGAAAA | Homo sapiens           |
| 1350269 scaffold   | scaffold_86 | 61341     | 61387     | 1  | ATCTAATTTTGGAAACATGAAAAACAGCACATTTGTCTTGAAGAAAA | Takifugu rubripes      |
| 1350269 chromosome | 2q          | 6942455   | 6942500   | -1 | ATCTAGCATTGTGACATCAACAAGCTGAATTGATGAAAACAAA     | Ciona intestinalis     |
| 1350269 group      | groupVI     | 10366564  | 10366610  | -1 | ATCTAATTTTGGAAACATGAAAAACAGCACATTTGTCTTGAAGAAAA | Gasterosteus aculeatus |
| 1350269 chromosome | 15          | 20142997  | 20143043  | 1  | ATCTAATTTTGGAAACATGAAAAACAGCACATTTGTCTTGAAGAAAA | Oryzias latipes        |
| 1350269 toplevel   | 13          | 14991889  | 14991935  | 1  | ATCTAATTTTGGAAACATGAAAAACAGCACATTTGTCTTGAAGAAAA | Danio rerio            |
| 1350269 chromosome | 14          | 22723687  | 22723733  | 1  | ATCTAATTTTGGAAACATGAAAAACAGCACATTTGTCTTGAAGAAAA | Mus musculus           |
| 1352661 reftig     | reftig_244  | 114285    | 114326    | 1  | TTTTTATTTGGTGTGCTGAAATTAGATTTGAATCTGAGCAAT      | Ciona savignyi         |
| 1352661 chromosome | 28          | 16329487  | 16329528  | 1  | TTTCAATTTGCTGCCACAGTAGTTTAATTTATTCGATATAAT      | Canis familiaris       |
| 1352661 chromosome | 10          | 102372596 | 102372637 | 1  | TTTCAATTTGCTGCCACAGTAGTTTAATTTATTCGATATAAT      | Homo sapiens           |
| 1352661 scaffold   | scaffold_86 | 642639    | 642680    | -1 | TTTCAATTTGCTGCTGCAGTAGTTTAATTTATTCATATAAT       | Takifugu rubripes      |
| 1352661 chromosome | 14p         | 192197    | 192238    | 1  | TTTTTATTTGATCTGCACGAATTTAATTTATCCAGACGAT        | Ciona intestinalis     |
| 1352661 group      | groupVI     | 9653144   | 9653185   | 1  | TTTCAATTTGCTGCTGCAGTAGTTTAATTTATTCATATAAT       | Gasterosteus aculeatus |
| 1352661 chromosome | 15          | 21110235  | 21110276  | -1 | TTTCAATTTGCTGCTGCAGTAGTTTAATTTATTCATATAAT       | Oryzias latipes        |
| 1352661 toplevel   | 12          | 47408158  | 47408199  | -1 | TTTCAATTTGCTGCCAGTAGTTTAATTTATTCATATAAT         | Danio rerio            |
| 1352661 chromosome | 19          | 44716014  | 44716055  | 1  | TTTCAATTTGCTGCCACAGTAGTTTAATTTATTCGATATAAT      | Mus musculus           |
