# Supplementary material for: Highly conserved elements discovered in vertebrates are present in non-syntenic loci of tunicates, act as enhancers and can be transcribed during development
Source: PubMed Central journal article supplement — Nucleic Acids Res. 2013 Feb 6;41(6):3600–18. doi: 10.1093/nar/gkt030 (PMC3616699; doi:10.1093/nar/gkt030), 2013-02-06
Supplement: supp_gkt030_nar-02655-h-2012-File009.pdf [file supp_gkt030_nar-02655-h-2012-File009.pdf]

| oCNE_id | mouse_desc                                                                                                                                                                                                  | ciona_desc                                                                                                            | amp_desc | oiko_desc                                                                         | mouse_id                                                     | ciona_id                                                     | amp_id | oiko_id                               |
|---------|-------------------------------------------------------------------------------------------------------------------------------------------------------------------------------------------------------------|-----------------------------------------------------------------------------------------------------------------------|----------|-----------------------------------------------------------------------------------|--------------------------------------------------------------|--------------------------------------------------------------|--------|---------------------------------------|
| 1349598 | mitogen-activated protein kinase associated protein 1 - family with sequence similarity 125, member B; similar to RIKEN cDNA 2610528K11 gene - similar to PBX3a; pre B-cell leukemia transcription factor 3 | Cytochrome P450 26B1 - Granule-bound starch synthase I, chloroplast precursor                                         | NA       | NA                                                                                | ENSMUSG00000038740 - ENSMUSG00000038718 - ENSMUSG00000038696 | ENSCING00000004828 - ENSCING00000004829                      | NA     | NA                                    |
| 1349616 | RIKEN cDNA 4930431F12 gene - LIM domain binding 2 - NA                                                                                                                                                      | Polypeptide N-acetylgalactosaminyltransferase 10 (pp-GaNTas - Proteasome activator complex subunit 3                  | NA       | NA                                                                                | ENSMUSG00000066937 - ENSMUSG00000062496 - ENSMUSG00000039706 | ENSCING00000005194 - ENSCING00000005209                      | NA     | NA                                    |
| 1349622 | mitogen-activated protein kinase associated protein 1 - GTPase activating protein and VPS9 domains 1                                                                                                        | Connective tissue growth factor precursor - Cullin-1                                                                  | NA       | NA                                                                                | ENSMUSG00000026867 - ENSMUSG00000038696                      | ENSCING00000010720 - ENSCING00000005383                      | NA     | NA                                    |
| 1349625 | BarH-like 2 - zinc finger protein 644                                                                                                                                                                       | Connective tissue growth factor precursor - Cullin-1                                                                  | NA       | NA                                                                                | ENSMUSG00000049606 - ENSMUSG00000034384                      | ENSCING00000010720 - ENSCING00000005383                      | NA     | NA                                    |
| 1349646 | nuclear factor of activated T-cells, cytoplasmic, calcineurin-dependent 1 - ATPase, class II, type 9B - sal-like 3                                                                                          | ETS domain protein Elk-1 - S-adenosylmethionine:tRNA ribosyltransferase-isomerase - Protein UNQ3023/PRO9821 precursor | NA       | NA                                                                                | ENSMUSG00000033016 - ENSMUSG00000024566 - ENSMUSG00000024565 | ENSCING00000002179 - ENSCING00000013268 - ENSCING00000002184 | NA     | NA                                    |
| 1349653 | mitogen-activated protein kinase associated protein 1 - family with sequence similarity 125, member B; similar to RIKEN cDNA 2610528K11 gene - similar to PBX3a; pre B-cell leukemia transcription factor 3 | Bone morphogenetic protein 2 precursor - LIM/homeobox protein Lhx4                                                    | NA       | NA                                                                                | ENSMUSG00000038740 - ENSMUSG00000038718 - ENSMUSG00000038696 | ENSCING00000001561 - ENSCING00000001549                      | NA     | NA                                    |
| 1349788 | similar to iroquois-class homeobox protein IRX2; Iroquois related homeobox 2 - Iroquois related homeobox 4                                                                                                  | Aquaporin-3 - Netrin receptor UNC5B precursor - Vacuolar protein 8                                                    | NA       | NA                                                                                | ENSMUSG00000021604 - ENSMUSG00000001504                      | ENSCING00000009585 - ENSCING00000009586 - ENSCING00000009588 | NA     | NA                                    |
| 1349840 | similar to 60S ribosomal protein L7a - G protein-coupled receptor 26                                                                                                                                        | Serine-protein kinase ATR - Probable RNA-dependent helicase p72                                                       | NA       | sco-spondin flags; precursor - lim homeobox protein lhx1 - homeobox protein lim-1 | ENSMUSG00000062758 - ENSMUSG00000040125                      | ENSCING00000004147 - ENSCING00000004150                      | NA     | GSOIDT00007000001 - GSOIDT00006999001 |
| 1349849 | vacuolar protein sorting 41 - POU domain, class 6, transcription factor 2                                                                                                                                   | G1 to S phase transition protein 1 homolog - Goliath protein precursor                                                | NA       | NA                                                                                | ENSMUSG00000009734 - ENSMUSG000000041236                     | ENSCING00000007500 - ENSCING00000011573                      | NA     | NA                                    |
| 1349879 | teashirt zinc finger family member 3 - zinc finger protein 536 - expressed sequence C80913                                                                                                                  | Homeobox protein SIX6 - ADP-dependent glucokinase                                                                     | NA       | NA                                                                                | ENSMUSG00000043456 - ENSMUSG00000030421 - ENSMUSG00000021217 | ENSCING00000005833 - ENSCING00000005828                      | NA     | NA                                    |

|         |                                                                                                           |                                                                                                                                                                            |    |    |                                                                 |                                                               |    |    |
|---------|-----------------------------------------------------------------------------------------------------------|----------------------------------------------------------------------------------------------------------------------------------------------------------------------------|----|----|-----------------------------------------------------------------|---------------------------------------------------------------|----|----|
| 1349882 | IKAROS family zinc finger 1 - fidgetin-like 1 - NA                                                        | Elongation factor 2 - NA                                                                                                                                                   | NA | NA | ENSMUSG00000035455 - ENSMUSG00000018654 - ENSMUSG00000073145    | ENSCING00000014672 - ENSCING00000014673                       | NA | NA |
| 1349883 | RIKEN cDNA 1700020003 gene - estrogen related receptor, beta                                              | Elongation factor 2 - NA                                                                                                                                                   | NA | NA | ENSMUSG00000021254 - ENSMUSG00000021255                         | ENSCING00000014672 - ENSCING00000014673                       | NA | NA |
| 1349895 | testis derived transcript - transcription factor EC                                                       | Connective tissue growth factor precursor - Cullin-1 - PHD finger protein 7                                                                                                | NA | NA | ENSMUSG00000029552 - ENSMUSG00000029553                         | ENSCING00000010720 - ENSCING00000005382 - ENSCING00000005383  | NA | NA |
| 1349971 | Hedgehog-interacting protein - anaphase promoting complex subunit 10 - glycoporin A                       | Transforming protein v-Fos/v-Fox - Laminin beta-1 chain precursor , MYO2_YEAST Myosin-2                                                                                    | NA | NA | ENSMUSG00000064325 - ENSMUSG00000051839 - ENSMUSG00000036977    | ENSCING00000003691 - ENSCING00000011918                       | NA | NA |
| 1349989 | limb and neural patterns - ATP synthase, H+ transporting, mitochondrial F0 complex, subunit c , isoform 3 | Probable ubiquitin carboxyl-terminal hydrolase 6 - Slit homolog 2 protein precursor                                                                                        | NA | NA | ENSMUSG00000018770 - ENSMUSG00000009207                         | ENSCING00000005369 - ENSCING00000006308                       | NA | NA |
| 1349996 | vacuolar protein sorting 41 - POU domain, class 6, transcription factor 2                                 | LIM homeobox transcription factor 1 beta (LIM/homeobox protein LMX1B) - Hypothetical protein ZK757.4 in chromosome III                                                     | NA | NA | ENSMUSG00000009734 - ENSMUSG000000041236                        | ENSCING00000006856 - ENSCING00000006855 - ENSCING000000013048 | NA | NA |
| 1350007 | kelch-like 1 - dachshund 1 - RIKEN cDNA 2410129H14 gene                                                   | Centrosomal protein 2 - Bifunctional adenosylcobalamin biosynthesis protein cobP [Includes: Adenosylcobinamide kinase ; Adenosylcobinamide-phosphate guanylyltransferase ] | NA | NA | ENSMUSG000000055639 - ENSMUSG000000033186 - ENSMUSG000000022076 | ENSCING00000008062 - ENSCING00000008061                       | NA | NA |
| 1350077 | kelch-like 1 - dachshund 1 - RIKEN cDNA 2410129H14 gene                                                   | Homeobox protein SIX6 - NACHT-, LRR- and PYD-containing protein 5                                                                                                          | NA | NA | ENSMUSG000000055639 - ENSMUSG000000033186 - ENSMUSG000000022076 | ENSCING00000005824 - ENSCING00000005828                       | NA | NA |
| 1350078 | limb and neural patterns - ATP synthase, H+ transporting, mitochondrial F0 complex, subunit c , isoform 3 | Dynactin-1 - Zinc finger protein 333                                                                                                                                       | NA | NA | ENSMUSG00000018770 - ENSMUSG00000009207                         | ENSCING00000002573 - ENSCING00000002579                       | NA | NA |
| 1350084 | dachshund 1 - kelch-like 1 - RIKEN cDNA 2410129H14 gene                                                   | Dynactin-1 - Zinc finger protein 333                                                                                                                                       | NA | NA | ENSMUSG000000055639 - ENSMUSG000000033186 - ENSMUSG000000022076 | ENSCING00000002573 - ENSCING00000002579                       | NA | NA |
| 1350090 | predicted gene 572 - castor homolog 1, zinc finger ; similar to castor homolog 1, zinc finger             | Bone morphogenetic protein 2 precursor - LIM/homeobox protein Lhx4                                                                                                         | NA | NA | ENSMUSG00000028977 - ENSMUSG000000070577                        | ENSCING00000001561 - ENSCING00000001549                       | NA | NA |

|         |                                                                                      |                                                                                                                                                                                                              |                                                                                                                                                                 |                                                   |                                                                                                                                               |    |                                       |
|---------|--------------------------------------------------------------------------------------|--------------------------------------------------------------------------------------------------------------------------------------------------------------------------------------------------------------|-----------------------------------------------------------------------------------------------------------------------------------------------------------------|---------------------------------------------------|-----------------------------------------------------------------------------------------------------------------------------------------------|----|---------------------------------------|
| 1350222 | MICAL-like 2 - UNC homeobox                                                          | Zinc finger protein 287 - Lamin B2                                                                                                                                                                           | NA                                                                                                                                                              | NA                                                | ENSMUSG00000029546 - ENSCING00000003868 - NA<br>ENSMUSG00000036718 - ENSCING00000003820                                                       | NA | NA                                    |
| 1350225 | MyoD family inhibitor - RIKEN cDNA 1700122O11 gene - forkhead box P4                 | Low-density lipoprotein receptor-related protein 6 precursor, PLMN_CANFA Plasminogen - Uridine 5-monophosphate synthase [Includes: Orotate phosphoribosyltransferase ; Orotidine 5-phosphate decarboxylase ] | NA                                                                                                                                                              | NA                                                | ENSMUSG000000032717 - ENSCING000000009202 - NA<br>ENSMUSG000000023991 - ENSCING000000012102<br>ENSMUSG000000042494                            | NA | NA                                    |
| 1350231 | neurogenic differentiation 2 - CDC2-related kinase, arginine/serine-rich             | RNA-binding protein 9 , A2BP1_MOUSE Ataxin 2-binding protein 1 - Thyroid transcription factor 1                                                                                                              | aminopeptidase n - alanyl aminopeptidase - aminopeptidase m - microsomal aminopeptidase cd_antigen=cd13 - d-galactoside-specific lectin - sea urchin egg lectin | NA                                                | ENSMUSG000000038255 - ENSCING00000006231 - 89427 - 89429<br>ENSMUSG00000003119 - ENSCING000000013912                                          | NA | NA                                    |
| 1350232 | neurogenic differentiation 2 - CDC2-related kinase, arginine/serine-rich             | RNA-binding protein 9 , A2BP1_MOUSE Ataxin 2-binding protein 1 - Thyroid transcription factor 1                                                                                                              | aminopeptidase n - alanyl aminopeptidase - aminopeptidase m - microsomal aminopeptidase cd_antigen=cd13 - d-galactoside-specific lectin - sea urchin egg lectin | NA                                                | ENSMUSG000000038255 - ENSCING00000006231 - 89427 - 89429<br>ENSMUSG00000003119 - ENSCING000000013912                                          | NA | NA                                    |
| 1350233 | adenylate cyclase activating polypeptide 1 receptor 1 - neurogenic differentiation 6 | RNA-binding protein 9 , A2BP1_MOUSE Ataxin 2-binding protein 1 - Thyroid transcription factor 1                                                                                                              | NA                                                                                                                                                              | NA                                                | ENSMUSG000000037984 - ENSCING000000013912 - NA<br>ENSMUSG000000029778 - ENSCING000000006231                                                   | NA | NA                                    |
| 1350234 | adenylate cyclase activating polypeptide 1 receptor 1 - neurogenic differentiation 6 | RNA-binding protein 9 , A2BP1_MOUSE Ataxin 2-binding protein 1 - Thyroid transcription factor 1                                                                                                              | NA                                                                                                                                                              | NA                                                | ENSMUSG000000037984 - ENSCING000000013912 - NA<br>ENSMUSG000000029778 - ENSCING000000006231                                                   | NA | NA                                    |
| 1350269 | catechol-O-methyltransferase domain containing 1 - zinc finger protein 503           | Copper-transporting ATPase 2 - Mucin and cadherin-like protein precursor                                                                                                                                     | NA                                                                                                                                                              | NA                                                | ENSMUSG000000021773 - ENSCING000000011363 - NA<br>ENSMUSG000000039081 - ENSCING000000007202                                                   | NA | NA                                    |
| 1350314 | zinc finger protein 503 - predicted gene 5670 - RIKEN cDNA 1700112E06 gene           | Lap1 protein - Muscle M-line assembly protein unc-89 - Orphan nuclear receptor NR4A1                                                                                                                         | NA                                                                                                                                                              | NA                                                | ENSMUSG000000059827 - ENSCING000000012645 - NA<br>ENSMUSG000000039081 - ENSCING000000003615 - NA<br>ENSMUSG000000063458 - ENSCING000000003616 | NA | NA                                    |
| 1350370 | kelch-like 4 - dachshund 2 - similar to choroideremia; choroideremia                 | Breast carcinoma amplified sequence 3 homolog - Serine/threonine-protein kinase MARK2 (MAP/microtubule affinity-regulating kinase 2) - T-box transcription factor TBX3                                       | NA                                                                                                                                                              | NA                                                | ENSMUSG000000025592 - ENSCING000000008678 - NA<br>ENSMUSG000000025597 - ENSCING000000008677 - NA<br>ENSMUSG000000025531 - ENSCING000000008679 | NA | NA                                    |
| 1350371 | kelch-like 1 - dachshund 1 - RIKEN cDNA 2410129H14 gene                              | Breast carcinoma amplified sequence 3 homolog - Serine/threonine-protein kinase MARK2 (MAP/microtubule affinity-regulating kinase 2) - T-box transcription factor TBX3                                       | NA                                                                                                                                                              | NA                                                | ENSMUSG000000055639 - ENSCING000000008678 - NA<br>ENSMUSG000000033186 - ENSCING000000008677 - NA<br>ENSMUSG000000022076 - ENSCING000000008679 | NA | NA                                    |
| 1350417 | early B-cell factor 3 - RIKEN cDNA 9430038I01 gene - NA                              | Ephrin type-A receptor 7 precursor - Prickle-like protein 2                                                                                                                                                  | NA                                                                                                                                                              | inactive serine protease 35 flags: precursor - NA | ENSMUSG000000040139 - ENSCING000000006726 - NA<br>ENSMUSG000000073800 - ENSCING000000013316<br>ENSMUSG000000010476                            | NA | GSOIDT00008567001 - GSOIDT00008565001 |

|         |                                                                                                              |                                                                                                                               |                |                                                                                                                                                                                                 |    |                                                                 |                                                              |                         |    |
|---------|--------------------------------------------------------------------------------------------------------------|-------------------------------------------------------------------------------------------------------------------------------|----------------|-------------------------------------------------------------------------------------------------------------------------------------------------------------------------------------------------|----|-----------------------------------------------------------------|--------------------------------------------------------------|-------------------------|----|
| 1350418 | early B-cell factor 3 - RIKEN cDNA 9430038I01 gene - NA                                                      | Ephrin type-A receptor 7 precursor protein 2                                                                                  | - Prickle-like | g-protein coupled receptor 54 - protein phosphatase 1 regulatory subunit 12b - myosin phosphatase-targeting subunit 2 - NA                                                                      | NA | ENSMUSG00000040139 - ENSMUSG00000073800 - ENSMUSG00000010476    | ENSCING00000006726 - ENSCING00000013316                      | 121092 - 214902 - 75705 | NA |
| 1350509 | forkhead box A2 - RIKEN cDNA A530006G24 gene                                                                 | Eukaryotic translation initiation factor 2-alpha kinase 4 - Fibroblast growth factor-18 precursor - Lambda-crystallin homolog | - NA           |                                                                                                                                                                                                 | NA | ENSMUSG00000037025 - ENSMUSG000000051986                        | ENSCING00000013546 - ENSCING00000003368 - ENSCING00000003366 |                         | NA |
| 1350521 | acyl-Coenzyme A dehydrogenase, short/branched chain - H6 homeo box 3                                         | Spastin - Probable porphobilinogen deaminase                                                                                  | - NA           |                                                                                                                                                                                                 | NA | ENSMUSG00000030861 - ENSMUSG00000040148                         | ENSCING00000010013 - ENSCING00000004267                      | NA                      | NA |
| 1350574 | neurogenic differentiation 2 - CDC2-related kinase, arginine/serine-rich                                     | Homeobox protein Nkx-2.5 - Myosin regulatory light chain 2B, cardiac muscle isoform                                           | - NA           |                                                                                                                                                                                                 | NA | ENSMUSG00000038255 - ENSMUSG00000003119                         | ENSCING00000007218 - ENSCING00000002749                      | NA                      | NA |
| 1350575 | adenylate cyclase activating polypeptide 1 receptor 1 - neurogenic differentiation 6                         | Homeobox protein Nkx-2.5 - Myosin regulatory light chain 2B, cardiac muscle isoform                                           | - NA           |                                                                                                                                                                                                 | NA | ENSMUSG00000037984 - ENSMUSG000000029778                        | ENSCING00000007218 - ENSCING00000002749                      | NA                      | NA |
| 1350584 | NIMA -related expressed kinase 7 - LIM homeobox protein 9 - ATPase, H+ transporting, lysosomal V1 subunit G3 | Glutamate receptor 3 precursor (Glutamate receptor ionotropic, AMPA 3) - Tenascin-X precursor                                 | - NA           |                                                                                                                                                                                                 | NA | ENSMUSG00000019230 - ENSMUSG000000026393 - ENSMUSG000000026394  | ENSCING00000008602 - ENSCING00000008600                      | NA                      | NA |
| 1350630 | dachshund 1 - kelch-like 1                                                                                   | Glutamate receptor 3 precursor (Glutamate receptor ionotropic, AMPA 3) - Tenascin-X precursor                                 | - NA           |                                                                                                                                                                                                 | NA | ENSMUSG00000055639 - ENSMUSG000000022076                        | ENSCING00000008602 - ENSCING00000008600                      | NA                      | NA |
| 1350641 | serine/threonine kinase 33 - LIM domain only 1                                                               | Transducin beta-like 2 protein                                                                                                | - Syntaxin-12  |                                                                                                                                                                                                 | NA | ENSMUSG00000031027 - ENSMUSG000000036111                        | ENSCING00000005614 - ENSCING000000012590                     | NA                      | NA |
| 1350669 | DNA segment, Chr 19, ERATO Doi 737, expressed - prolactin releasing hormone receptor                         | Golgi-associated plant pathogenesis-related protein 1 - Brain-specific homeobox/POU domain protein 3                          |                | integrin alpha-8 contains: - integrin alpha-8 heavy chain contains: - integrin alpha-8 light chain flags: precursor - rac gtpase-activating protein 1 - male germ cell ap - protein cyk4 homolg | NA | ENSMUSG000000057858 - ENSMUSG000000045052                       | ENSCING00000004922 - ENSCING00000004925                      | 125595 - 125596 - 89654 | NA |
| 1350679 | Obg-like ATPase 1 - RIKEN cDNA 1700011J10 gene - trans-acting transcription factor 9                         | Aquaporin-3 - Netrin receptor UNC5B precursor - Vacuolar protein 8                                                            | - NA           |                                                                                                                                                                                                 | NA | ENSMUSG000000063714 - ENSMUSG000000027108 - ENSMUSG000000068859 | ENSCING00000009585 - ENSCING00000009586 - ENSCING00000009588 | NA                      | NA |
| 1350687 | zinc finger protein 536 - teashirt zinc finger family member 3                                               | Homeobox protein ceh-19 - Programmed cell death 6 interacting protein                                                         | - NA           |                                                                                                                                                                                                 | NA | ENSMUSG000000043456 - ENSMUSG000000021217                       | ENSCING00000002052 - ENSCING00000002054                      | NA                      | NA |

|         |                                                                                                                                                                                                             |                                                                                                                                                                          |                                                                                                                                                                                    |                                                                                                                        |                                                                                                                             |    |                                       |
|---------|-------------------------------------------------------------------------------------------------------------------------------------------------------------------------------------------------------------|--------------------------------------------------------------------------------------------------------------------------------------------------------------------------|------------------------------------------------------------------------------------------------------------------------------------------------------------------------------------|------------------------------------------------------------------------------------------------------------------------|-----------------------------------------------------------------------------------------------------------------------------|----|---------------------------------------|
| 1350742 | zinc finger protein 169 - inhibitor of DNA binding 4                                                                                                                                                        | Cytochrome P450 2C20 - Transcription factor SOX-2                                                                                                                        | somatostatin receptor type 4 - canalicular multispecific organic anion transporter 2 - atp-binding cassette sub-family c member 3 - multidrug resistance-associated protein 3 - NA | NA                                                                                                                     | ENSMUSG00000050954 - ENSCING00000006005 - 90872 - 90871 - ENSMUSG00000021379 - ENSCING00000013805 - 90874                   | NA |                                       |
| 1350760 | mitogen-activated protein kinase associated protein 1 - family with sequence similarity 125, member B; similar to RIKEN cDNA 2610528K11 gene - similar to PBX3a; pre B-cell leukemia transcription factor 3 | UPF0139 protein CGI-140 - Probable 60S ribosomal protein L37-A - Dual specificity protein phosphatase CDC14A                                                             | NA                                                                                                                                                                                 | NA                                                                                                                     | ENSMUSG00000038740 - ENSCING00000007518 - ENSMUSG00000038718 - ENSCING00000007516 - ENSMUSG00000038696 - ENSCING00000013171 | NA |                                       |
| 1350761 | early B-cell factor 3 - RIKEN cDNA 9430038I01 gene - NA                                                                                                                                                     | Golgi-associated plant pathogenesis-related protein 1 - Brain-specific homeobox/POU domain protein 3                                                                     | NA                                                                                                                                                                                 | phospholipid scramblase 1 - ca(2+)-dependent phospholipid scramblase 1 - erythrocyte phospholipid scramblase - 1b - NA | ENSMUSG00000073800 - ENSCING00000004922 - ENSMUSG00000040139 - ENSCING00000004925 - ENSMUSG00000010476                      | NA | GSOIDT00011458001 - GSOIDT00011459001 |
| 1350763 | teashirt zinc finger family member 3 - zinc finger protein 536                                                                                                                                              | Golgi-associated plant pathogenesis-related protein 1 - Brain-specific homeobox/POU domain protein 3                                                                     | NA                                                                                                                                                                                 | NA                                                                                                                     | ENSMUSG00000043456 - ENSCING00000004922 - ENSMUSG00000021217 - ENSCING00000004925                                           | NA | NA                                    |
| 1350782 | DNA segment, Chr 19, ERATO Doi 737, expressed - prolactin releasing hormone receptor                                                                                                                        | Homeobox protein Nkx-2.5 - Dysferlin , SY63_DISOM Synaptotagmin C - Myosin regulatory light chain 2B, cardiac muscle isoform                                             | NA                                                                                                                                                                                 | NA                                                                                                                     | ENSMUSG00000057858 - ENSCING00000007218 - ENSMUSG00000045052 - ENSCING00000002749 - ENSCING00000007216                      | NA | NA                                    |
| 1350807 | glycosyltransferase-like domain containing 1 - Rho GTPase activating protein 15                                                                                                                             | Zinc finger DHHC domain containing protein 14 - Held out wings protein - Hypothetical protein AQ_1348                                                                    | NA                                                                                                                                                                                 | NA                                                                                                                     | ENSMUSG00000049744 - ENSCING00000002548 - ENSMUSG00000036890 - ENSCING00000002542 - ENSCING00000002549                      | NA | NA                                    |
| 1350874 | RIKEN cDNA B230120H23 gene - cell division cycle associated 7                                                                                                                                               | Homeobox protein Nkx-2.5 - Dysferlin , SY63_DISOM Synaptotagmin C                                                                                                        | NA                                                                                                                                                                                 | NA                                                                                                                     | ENSMUSG00000055612 - ENSCING00000007218 - ENSMUSG00000004085 - ENSCING00000007216                                           | NA | NA                                    |
| 1350888 | inscuteable homolog - predicted gene 6816; ribosomal protein S4, Y-linked 2                                                                                                                                 | GTP-binding protein era homolog - Cadherin-18 precursor                                                                                                                  | NA                                                                                                                                                                                 | NA                                                                                                                     | ENSMUSG00000046411 - ENSCING00000003678 - ENSMUSG00000048782 - ENSCING00000003676                                           | NA | NA                                    |
| 1350896 | mitogen-activated protein kinase associated protein 1 - GTPase activating protein and VPS9 domains 1                                                                                                        | Transducin beta-like 2 protein - Syntaxin-12                                                                                                                             | NA                                                                                                                                                                                 | NA                                                                                                                     | ENSMUSG00000026867 - ENSCING00000005614 - ENSMUSG00000038696 - ENSCING00000012590                                           | NA | NA                                    |
| 1350900 | MICAL-like 2 - UNC homeobox                                                                                                                                                                                 | Probable ubiquitin carboxyl-terminal hydrolase 6 - Calpain B [Contains: Calpain B catalytic subunit 1; Calpain B catalytic subunit 2] - Slit homolog 2 protein precursor | NA                                                                                                                                                                                 | NA                                                                                                                     | ENSMUSG00000029546 - ENSCING00000005369 - ENSMUSG00000036718 - ENSCING00000006308 - ENSCING00000005392                      | NA | NA                                    |
| 1350930 | polyamine modulated factor 1 binding protein 1 - predicted gene 1943                                                                                                                                        | Myeloid/lymphoid or mixed-lineage leukemia protein 4 - Dorsal-ventral patterning tolloid-like protein 1 precursor                                                        | NA                                                                                                                                                                                 | NA                                                                                                                     | ENSMUSG00000064064 - ENSCING00000003765 - ENSMUSG00000031727 - ENSCING00000003763                                           | NA | NA                                    |

|                |                                                                                                                                        |                                                                                                      |    |                                            |                                                                 |                                           |    |                                       |
|----------------|----------------------------------------------------------------------------------------------------------------------------------------|------------------------------------------------------------------------------------------------------|----|--------------------------------------------|-----------------------------------------------------------------|-------------------------------------------|----|---------------------------------------|
| <b>1351012</b> | predicted gene 5182; acetyl-Coenzyme A carboxylase alpha - apoptosis antagonizing transcription factor                                 | Kin of IRRE-like protein 3 precursor - Protein C14orf159 homolog, mitochondrial precursor            | NA | serine threonine-protein kinase pim-1 - NA | ENSMUSG00000018697 - ENSMUSG00000020532                         | ENSCING00000013880 - ENSCING00000013881   | NA | GSOIDT00017926001 - GSOIDT00017925001 |
| <b>1351013</b> | DNA segment, Chr 19, ERATO Doi 737, expressed - prolactin releasing hormone receptor - RIKEN cDNA E330013P04 gene                      | Protein C14orf159 homolog, mitochondrial precursor - Kin of IRRE-like protein 3 precursor            | NA | NA                                         | ENSMUSG000000057858 - ENSMUSG000000045052 - ENSMUSG000000053117 | ENSCING00000013880 - ENSCING00000013881   | NA | NA                                    |
| <b>1351047</b> | zinc finger protein 536 - teashirt zinc finger family member 3                                                                         | Tumor protein p73-like - Hypothetical 51.2 kDa protein in LAG1-RPL14B intergenic region              | NA | NA                                         | ENSMUSG000000043456 - ENSMUSG000000021217                       | ENSCING00000001960 - ENSCING000000010159  | NA | NA                                    |
| <b>1351049</b> | transmembrane 9 superfamily member 2 - citrate lyase beta like                                                                         | Midline 1 protein - Polycystic kidney disease and receptor for egg jelly related protein precursor   | NA | NA                                         | ENSMUSG000000025544 - ENSMUSG000000025545                       | ENSCING00000009882 - ENSCING00000008591   | NA | NA                                    |
| <b>1351069</b> | early B-cell factor 3 - RIKEN cDNA 9430038I01 gene - NA                                                                                | TPR repeat containing protein KIAA1043 - Brain-specific homeobox/POU domain protein 3                | NA | NA                                         | ENSMUSG000000073800 - ENSMUSG000000040139 - ENSMUSG000000010476 | ENSCING00000004922 - ENSCING00000004914   | NA | NA                                    |
| <b>1351070</b> | vesicle transport through interaction with t-SNAREs homolog 1A - transcription factor 7-like 2, T-cell specific, HMG-box               | TPR repeat containing protein KIAA1043 - Brain-specific homeobox/POU domain protein 3                | NA | NA                                         | ENSMUSG000000024983 - ENSMUSG000000024985                       | ENSCING00000004922 - ENSCING00000004914   | NA | NA                                    |
| <b>1351072</b> | glycerol phosphate dehydrogenase 2, mitochondrial - UDP-N-acetyl-alpha-D-galactosamine:polypeptide N-acetylgalactosaminyltransferase 5 | TPR repeat containing protein KIAA1043 - Brain-specific homeobox/POU domain protein 3                | NA | NA                                         | ENSMUSG000000026827 - ENSMUSG000000026828                       | ENSCING00000004922 - ENSCING00000004914   | NA | NA                                    |
| <b>1351073</b> | sal-like 3 - galanin receptor 1                                                                                                        | TPR repeat containing protein KIAA1043 - Brain-specific homeobox/POU domain protein 3                | NA | NA                                         | ENSMUSG000000024565 - ENSMUSG000000024553                       | ENSCING00000004922 - ENSCING00000004914   | NA | NA                                    |
| <b>1351111</b> | predicted gene 826 - predicted gene 4713; DEAH box polypeptide 35; hypothetical protein LOC100046264                                   | Deoxyhypusine synthase - Macrophage mannose receptor precursor                                       | NA | NA                                         | ENSMUSG000000074623 - ENSMUSG000000027655                       | ENSCING00000003379 - ENSCING00000003390   | NA | NA                                    |
| <b>1351235</b> | SRY-box containing gene 6 - predicted gene 6816; ribosomal protein S4, Y-linked 2                                                      | Trigger factor - Ephrin type-A receptor 4 precursor                                                  | NA | NA                                         | ENSMUSG000000046411 - ENSMUSG000000051910                       | ENSCING00000002622 - ENSCING00000002625   | NA | NA                                    |
| <b>1351246</b> | hypoxia-inducible factor 1, alpha subunit inhibitor - paired box gene 2                                                                | Regulator of G-protein signaling 3 - F-box only protein 44, SYTL5_MOUSE Synaptotagmin-like protein 5 | NA | NA                                         | ENSMUSG000000036450 - ENSMUSG000000004231                       | ENSCING000000001948 - ENSCING000000012723 | NA | NA                                    |

|         |                                                                                                                       |                                                                                                                                             |    |    |                                                                  |                                                                 |    |
|---------|-----------------------------------------------------------------------------------------------------------------------|---------------------------------------------------------------------------------------------------------------------------------------------|----|----|------------------------------------------------------------------|-----------------------------------------------------------------|----|
| 1351292 | forkhead box P1 - NA                                                                                                  | Dynein heavy chain, cytosolic - Neuronal membrane glycoprotein M6-b - Putative fat-like cadherin-related tumor suppressor homolog precursor | NA | NA | ENSMUSG00000030067 - ENSMUSG000000079448                         | ENSCING00000014600 - ENSCING00000014592 - ENSCING00000002930    | NA |
| 1351312 | dachshund 1 - kelch-like 1 - RIKEN cDNA 2410129H14 gene                                                               | Disheveled associated activator of morphogenesis 1, DIAP1_MOUSE Diaphanous protein homolog 1 - Mitogen-activated protein kinase 10          | NA | NA | ENSMUSG000000055639 - ENSMUSG00000003186 - ENSMUSG000000022076   | ENSCING00000009311 - ENSCING00000009313                         | NA |
| 1351347 | matrix metalloproteinase 2 - glyceraldehyde-3-phosphate dehydrogenase                                                 | Cell cycle control protein cwf18 - Cell division cycle protein 48 homolog MJ1156                                                            | NA | NA | ENSMUSG000000078967 - ENSMUSG000000031740                        | ENSCING000000005261 - ENSCING000000005214                       | NA |
| 1351352 | LIM homeobox protein 2 - similar to DENN/MADD domain containing 1A; DENN/MADD domain containing 1A - crumbs homolog 2 | LIM homeobox transcription factor 1 beta (LIM/homeobox protein LMX1B) - WD-repeat protein 8                                                 | NA | NA | ENSMUSG000000035403 - ENSMUSG000000000247 - ENSMUSG000000035392  | ENSCING00000006856 - ENSCING00000006857                         | NA |
| 1351357 | RIKEN cDNA 3425401B19 gene - paired related homeobox protein-like 1 - RIKEN cDNA 9430077A04 gene                      | Probable disulfide bond formation protein D precursor - Dihydroorotate dehydrogenase                                                        | NA | NA | ENSMUSG000000071540 - ENSMUSG000000041730 - ENSMUSG000000044973  | ENSCING000000013239 - ENSCING000000013240                       | NA |
| 1351380 | teashirt zinc finger family member 3 - zinc finger protein 536                                                        | Cystinosin - Latrophilin-3 precursor                                                                                                        | NA | NA | ENSMUSG000000043456 - ENSMUSG000000021217                        | ENSCING000000002093 - ENSCING000000002092                       | NA |
| 1351391 | SRY-box containing gene 6 - RIKEN cDNA 1110006G14 gene - predicted gene 6816; ribosomal protein S4, Y-linked 2        | Homeobox protein Meis1 - Phenylalanyl-tRNA synthetase beta chain                                                                            | NA | NA | ENSMUSG000000030664 - ENSMUSG000000046411 - ENSMUSG000000051910  | ENSCING000000013955 - ENSCING000000005356                       | NA |
| 1351400 | SRY-box containing gene 21 - ATP-binding cassette, sub-family C (CFTR/MRP), member 4                                  | Leucine-rich repeat transmembrane neuronal protein 2 precursor - Cyclin-dependent kinase inhibitor 1B                                       | NA | NA | ENSMUSG000000032849 - ENSMUSG000000061517                        | ENSCING000000011649 - ENSCING000000011650                       | NA |
| 1351415 | ribosomal protein S6 pseudogene - cylindromatosis                                                                     | Alpha-fetoprotein enhancer binding protein , ZFHx2_HUMAN Zinc finger homeobox protein 2 - Myosin-3                                          | NA | NA | ENSMUSG000000075581 - ENSMUSG000000036712                        | ENSCING000000011787 - ENSCING000000007138                       | NA |
| 1351439 | similar to CDNA sequence BC052040; cDNA sequence BC052040 - Meis homeobox 2 - transmembrane and coiled-coil domains 5 | DNA-methyltransferase 1 - Monocarboxylate transporter 5 - Cadherin-23 precursor                                                             | NA | NA | ENSMUSG000000040282 - ENSMUSG000000027210 - ENSMUSG000000027355  | ENSCING000000000549 - ENSCING000000000518 - ENSCING000000004413 | NA |
| 1351455 | GLI-Kruppel family member GLI3 - inhibin beta-A - expressed sequence AW209491                                         | Protein disulfide-isomerase A4 precursor - Choline-phosphate cytidylyltransferase A                                                         | NA | NA | ENSMUSG000000039182 - ENSMUSG000000021318 - ENSMUSG0000000041324 | ENSCING000000006402 - ENSCING000000006412                       | NA |

|         |                                                                                                                                                                                                             |                                                                                                                                                                                                                           |                                                                    |    |                                                                                                             |                |    |
|---------|-------------------------------------------------------------------------------------------------------------------------------------------------------------------------------------------------------------|---------------------------------------------------------------------------------------------------------------------------------------------------------------------------------------------------------------------------|--------------------------------------------------------------------|----|-------------------------------------------------------------------------------------------------------------|----------------|----|
| 1351471 | vacuolar protein sorting 41 - POU domain, class 6, transcription factor 2                                                                                                                                   | RPE-retinal G protein-coupled receptor - Forkhead box protein C2                                                                                                                                                          | NA                                                                 | NA | ENSMUSG00000009734 - ENSCING00000011280 - ENSMUSG000000041236 - ENSCING00000008146                          | NA             | NA |
| 1351484 | SRY-box containing gene 21 - ATP-binding cassette, sub-family C (CFTR/MRP), member 4                                                                                                                        | RING finger protein 4 - C-type natriuretic peptide-2 precursor                                                                                                                                                            | NA                                                                 | NA | ENSMUSG000000032849 - ENSCING00000006925 - ENSMUSG000000061517 - ENSCING000000012026                        | NA             | NA |
| 1351498 | NA - forkhead box B2                                                                                                                                                                                        | Four and a half LIM domains protein 2 - MAM domain containing protein 2 precursor                                                                                                                                         | NA                                                                 | NA | ENSMUSG000000054366 - ENSCING000000003943 - ENSMUSG000000056829 - ENSCING000000003946                       | NA             | NA |
| 1351518 | kelch-like 1 - dachshund 1 - RIKEN cDNA 2410129H14 gene                                                                                                                                                     | Beta-1,4-galactosyltransferase 1 (Beta-1,4-GalTase 1) (UDP-galactose:beta-N-acetylglucosamine beta-1,4-galactosyltransferase 1) (UDP-Gal:beta-GlcNAc beta-1,4-galactosyltransferase 1) [Includes: L - Ephrin-B2 precursor | NA                                                                 | NA | ENSMUSG000000055639 - ENSCING000000005997 - ENSMUSG000000022076 - ENSCING000000010012 - ENSMUSG000000033186 | NA             | NA |
| 1351583 | RIKEN cDNA 1700106N22 gene - Six3 opposite strand transcript 1                                                                                                                                              | Forkhead box protein I1 (HNF-3/fork-head homolog-3)                                                                                                                                                                       | NA                                                                 | NA | ENSMUSG000000071037 - ENSCING000000013204 - ENSMUSG000000056364 - ENSCING000000013203                       | NA             | NA |
| 1351589 | orofacial cleft 1 candidate 1 - solute carrier family 35, member B3 - NA                                                                                                                                    | Alpha-fetoprotein enhancer binding protein , ZFHx2_HUMAN Zinc finger homeobox protein 2 - Myosin-3                                                                                                                        | cd209 antigen - dendritic cell-icam-3-grabbing non-integrin 1 - NA | NA | ENSMUSG000000021432 - ENSMUSG000000055732 - ENSMUSG000000047094 - ENSCING000000011787 - ENSCING000000007138 | 217378 - 77329 | NA |
| 1351602 | forkhead box A2 - RIKEN cDNA A530006G24 gene                                                                                                                                                                | Cell cycle control protein cwf18 - Cell division cycle protein 48 homolog MJ1156                                                                                                                                          | NA                                                                 | NA | ENSMUSG000000037025 - ENSCING000000005261 - ENSMUSG000000051986 - ENSCING000000005214                       | NA             | NA |
| 1351662 | mitogen-activated protein kinase associated protein 1 - similar to PBX3a; pre B-cell leukemia transcription factor 3 - family with sequence similarity 125, member B; similar to RIKEN cDNA 2610528K11 gene | Retinal homeobox protein Rx3 - Dymeclin                                                                                                                                                                                   | NA                                                                 | NA | ENSMUSG000000038740 - ENSMUSG000000038718 - ENSMUSG000000038696 - ENSCING000000012765 - ENSCING000000007877 | NA             | NA |
| 1351665 | hypoxia-inducible factor 1, alpha subunit inhibitor - paired box gene 2                                                                                                                                     | Putative Polycomb group protein ASXL1 - Hypothetical protein sll1388 - Guanine nucleotide-binding protein G, alpha subunit                                                                                                | NA                                                                 | NA | ENSMUSG000000036450 - ENSMUSG000000004231 - ENSCING000000011744 - ENSCING000000003915 - ENSCING000000003911 | NA             | NA |
| 1351739 | RIKEN cDNA B230120H23 gene - cell division cycle associated 7                                                                                                                                               | Ephrin type-A receptor 4A precursor - Essential meiotic endonuclease 1                                                                                                                                                    | NA                                                                 | NA | ENSMUSG000000055612 - ENSCING000000005864 - ENSMUSG000000004085 - ENSCING000000001281                       | NA             | NA |
| 1351743 | transmembrane 9 superfamily member 2 - citrate lyase beta like                                                                                                                                              | Putative aminotransferase MJ0959 - Photosystem I P700 chlorophyll a apoprotein A2                                                                                                                                         | NA                                                                 | NA | ENSMUSG000000025544 - ENSCING000000013621 - ENSMUSG000000025545 - ENSCING000000007920                       | NA             | NA |



|         |                                                                                                                          |                                                                                                                                                |    |    |                                                                                                           |    |    |
|---------|--------------------------------------------------------------------------------------------------------------------------|------------------------------------------------------------------------------------------------------------------------------------------------|----|----|-----------------------------------------------------------------------------------------------------------|----|----|
| 1351751 | RIKEN cDNA 1110033M05 gene - nuclear receptor subfamily 2, group F, member 1                                             | Nuclear factor 1 X-type (Nuclear factor 1/X) (NF-1/X) - Isoleucyl-tRNA synthetase, cytoplasmic                                                 | NA | NA | ENSMUSG00000069171 - ENSCING00000002528 - ENSMUSG000000064138 ENSCING000000002466                         | NA | NA |
| 1351796 | protein phosphatase 1A, magnesium dependent, alpha isoform - Six6 opposite strand transcript 1                           | Cell cycle control protein cwf18 - Cell division cycle protein 48 homolog MJ1156                                                               | NA | NA | ENSMUSG000000021096 - ENSCING000000005261 - ENSMUSG000000021098 ENSCING000000005214                       | NA | NA |
| 1351879 | pellino 2 - orthodenticle homolog 2 - RIKEN cDNA 6720456H20 gene                                                         | Vesicle-associated membrane protein-associated protein B - Myosin-10                                                                           | NA | NA | ENSMUSG000000036339 - ENSCING000000009046 - ENSMUSG000000021846 - ENSCING000000012432 ENSMUSG000000021848 | NA | NA |
| 1351907 | SRY-box containing gene 21 - ATP-binding cassette, sub-family C (CFTR/MRP), member 4                                     | Alpha-fetoprotein enhancer binding protein , ZFHx2_HUMAN Zinc finger homeobox protein 2 - Myosin-3                                             | NA | NA | ENSMUSG000000032849 - ENSCING000000011787 - ENSMUSG000000061517 ENSCING000000007138                       | NA | NA |
| 1351973 | MICAL-like 2 - UNC homeobox                                                                                              | G2/mitotic-specific cyclin B3 - Brain-specific angiogenesis inhibitor 3 precursor                                                              | NA | NA | ENSMUSG000000029546 - ENSCING000000007701 - ENSMUSG000000036718 ENSCING000000007729                       | NA | NA |
| 1351990 | short stature homeobox 2 - arginine/serine-rich coiled-coil 1 - myeloid leukemia factor 1                                | Calcium-dependent protein kinase, isoform AK1 - Regulatory protein E2                                                                          | NA | NA | ENSMUSG000000048416 - ENSCING000000016440 - ENSMUSG000000034544 - ENSCING000000006158 ENSMUSG000000027833 | NA | NA |
| 1352042 | acyl-Coenzyme A dehydrogenase, short/branched chain - H6 homeo box 3                                                     | Deoxyhypusine synthase - Reversion-inducing cysteine-rich protein with Kazal motifs precursor                                                  | NA | NA | ENSMUSG000000030861 - ENSCING000000014940 - ENSMUSG000000040148 ENSCING000000002924                       | NA | NA |
| 1352046 | orofacial cleft 1 candidate 1 - NA                                                                                       | Brain-specific angiogenesis inhibitor 1 precursor - Diacylglycerol kinase, beta - Myosin light chain kinase, smooth muscle [Contains: Telokin] | NA | NA | ENSMUSG000000047094 - ENSCING000000012357 - ENSMUSG000000005732 ENSCING000000012356 - ENSCING000000007746 | NA | NA |
| 1352077 | Hey-like transcription factor - acyl-CoA synthetase long-chain family member 1                                           | Alpha-fetoprotein enhancer binding protein , ZFHx2_HUMAN Zinc finger homeobox protein 2 - Myosin-3                                             | NA | NA | ENSMUSG000000018796 - ENSCING000000011787 - ENSMUSG000000047171 ENSCING000000007138                       | NA | NA |
| 1352078 | forkhead box D3 - NA                                                                                                     | Alpha-fetoprotein enhancer binding protein , ZFHx2_HUMAN Zinc finger homeobox protein 2 - Myosin-3                                             | NA | NA | ENSMUSG000000070891 - ENSCING000000011787 - ENSMUSG000000067261 ENSCING000000007138                       | NA | NA |
| 1352080 | zinc finger protein of the cerebellum 4 - phospholipid scramblase 1; predicted gene 5530; hypothetical protein LOC677340 | Crystal protein precursor - Bone morphogenetic protein 7 precursor                                                                             | NA | NA | ENSMUSG000000036972 - ENSCING000000011402 - ENSMUSG000000032369 ENSCING000000003777                       | NA | NA |

|         |                                                                                                                                                                                                             |                                                                                                           |                                                                                                                                                                                                                                      |                                                                              |                                                              |                                                                 |                         |                                       |
|---------|-------------------------------------------------------------------------------------------------------------------------------------------------------------------------------------------------------------|-----------------------------------------------------------------------------------------------------------|--------------------------------------------------------------------------------------------------------------------------------------------------------------------------------------------------------------------------------------|------------------------------------------------------------------------------|--------------------------------------------------------------|-----------------------------------------------------------------|-------------------------|---------------------------------------|
| 1352107 | phosphate cytidylyltransferase 1, choline, beta isoform - polymerase , alpha 1 - aristaless related homeobox                                                                                                | Transforming protein Qin - Phosphatidylinositol 3-kinase, root isoform                                    | NA                                                                                                                                                                                                                                   | NA                                                                           | ENSMUSG00000035277 - ENSMUSG00000006678 - ENSMUSG00000035246 | ENSCING00000003389 - ENSCING00000013252                         | NA                      | NA                                    |
| 1352111 | LIM domain only 3 - immunoglobulin binding protein 1b                                                                                                                                                       | Transforming protein Qin - Phosphatidylinositol 3-kinase, root isoform                                    | NA                                                                                                                                                                                                                                   | NA                                                                           | ENSMUSG00000030226 - ENSMUSG00000046717                      | ENSCING00000003389 - ENSCING00000013252                         | NA                      | NA                                    |
| 1352116 | ribosomal protein S6 pseudogene - cylindromatosis                                                                                                                                                           | Transforming protein Qin - Phosphatidylinositol 3-kinase, root isoform                                    | NA                                                                                                                                                                                                                                   | NA                                                                           | ENSMUSG00000075581 - ENSMUSG00000036712                      | ENSCING00000003389 - ENSCING00000013252                         | NA                      | NA                                    |
| 1352117 | serine/threonine kinase 33 - LIM domain only 1                                                                                                                                                              | Transforming protein Qin - Phosphatidylinositol 3-kinase, root isoform                                    | NA                                                                                                                                                                                                                                   | NA                                                                           | ENSMUSG00000031027 - ENSMUSG00000036111                      | ENSCING00000003389 - ENSCING00000013252                         | NA                      | NA                                    |
| 1352154 | MyoD family inhibitor - RIKEN cDNA 1700122O11 gene - forkhead box P4                                                                                                                                        | Phosphatidylinositol-glycan biosynthesis, class F protein - 60S ribosomal protein L31                     | sorting nexin-2 - patched domain-containing protein 3 - rnd-type protein rndeu-3 - NA                                                                                                                                                | NA                                                                           | ENSMUSG00000032717 - ENSMUSG00000023991 - ENSMUSG00000042494 | ENSCING00000011538 - 67655 - 57285 - ENSCING00000015137 - 67656 | NA                      | NA                                    |
| 1352188 | Obg-like ATPase 1 - RIKEN cDNA 1700011J10 gene - trans-acting transcription factor 9                                                                                                                        | Semaphorin 6B precursor - Phospholipase A2, taipoxin alpha chain                                          | NA                                                                                                                                                                                                                                   | NA                                                                           | ENSMUSG00000063714 - ENSMUSG00000027108 - ENSMUSG00000068859 | ENSCING00000014941 - ENSCING00000014939                         | NA                      | NA                                    |
| 1352277 | NMDA receptor-regulated gene 2 - RAR-related orphan receptor alpha                                                                                                                                          | T-cell leukemia homeobox protein 3 - Nephrocystin-4                                                       | NA                                                                                                                                                                                                                                   | NA                                                                           | ENSMUSG00000032235 - ENSMUSG00000032238                      | ENSCING00000006177 - ENSCING00000006178                         | NA                      | NA                                    |
| 1352288 | RIKEN cDNA 4930473A06 gene - basoenuclin 2 - centlein, centrosomal protein                                                                                                                                  | Cell cycle control protein cwf18 - Cell division cycle protein 48 homolog MJ1156                          | NA                                                                                                                                                                                                                                   | inositol-trisphosphate 3-kinase c - inositol - trisphosphate 3-kinase c - NA | ENSMUSG00000052407 - ENSMUSG00000038070 - ENSMUSG00000028487 | ENSCING00000005261 - ENSCING00000005214                         | NA                      | GSOIDT00002506001 - GSOIDT00002504001 |
| 1352295 | mitogen-activated protein kinase associated protein 1 - family with sequence similarity 125, member B; similar to RIKEN cDNA 2610528K11 gene - similar to PBX3a; pre B-cell leukemia transcription factor 3 | Bone morphogenetic protein 1 homolog precursor - ATP-dependent rRNA helicase SPB4 - Kelch-like protein 20 | NA                                                                                                                                                                                                                                   | NA                                                                           | ENSMUSG00000038740 - ENSMUSG00000038718 - ENSMUSG00000038696 | ENSCING00000009621 - ENSCING00000012930 - ENSCING00000009622    | NA                      | NA                                    |
| 1352298 | neurogenic differentiation 2 - CDC2-related kinase, arginine/serine-rich                                                                                                                                    | RW1 protein - Transmembrane protein 33                                                                    | protocadherin fat 4 - cadherin family member 14 - fat tumor suppressor homolog 4 - fat-like cadherin protein fat-j flags: precursor - tripartite motif-containing protein 3 - ring finger protein 22 - ring finger protein hac1 - NA | NA                                                                           | ENSMUSG00000003119 - ENSMUSG00000038255                      | ENSCING00000014411 - ENSCING00000007252                         | 120240 - 210534 - 73045 | NA                                    |
| 1352300 | adenylate cyclase activating polypeptide 1 receptor 1 - neurogenic differentiation 6                                                                                                                        | Transmembrane protein 33 - RW1 protein                                                                    | NA                                                                                                                                                                                                                                   | NA                                                                           | ENSMUSG00000037984 - ENSMUSG000000029778                     | ENSCING00000014411 - ENSCING00000007252                         | NA                      | NA                                    |

|         |                                                                                                                                                                     |                                                                                                                                           |    |    |                                                              |                                                               |    |
|---------|---------------------------------------------------------------------------------------------------------------------------------------------------------------------|-------------------------------------------------------------------------------------------------------------------------------------------|----|----|--------------------------------------------------------------|---------------------------------------------------------------|----|
| 1352362 | distal-less homeobox 6 - distal-less homeobox 5                                                                                                                     | Maternal tudor protein - Homeobox protein SIX4 - GC-rich sequence DNA-binding factor                                                      | NA | NA | ENSMUSG00000029754 - ENSMUSG00000029755                      | ENSCING00000004747 - ENSCING00000004740 - ENSCING00000004748  | NA |
| 1352363 | predicted gene 572 - castor homolog 1, zinc finger ; similar to castor homolog 1, zinc finger                                                                       | Maternal tudor protein - Homeobox protein SIX4 - GC-rich sequence DNA-binding factor                                                      | NA | NA | ENSMUSG00000070577 - ENSMUSG00000028977                      | ENSCING00000004747 - ENSCING00000004740 - ENSCING00000004748  | NA |
| 1352377 | tetratricopeptide repeat domain 29 - POU domain, class 4, transcription factor 2                                                                                    | Regulator of nonsense transcripts 2 - Apical protein                                                                                      | NA | NA | ENSMUSG00000037101 - ENSMUSG00000031688                      | ENSCING00000012071 - ENSCING00000002888 - ENSCING00000001457  | NA |
| 1352396 | mitogen-activated protein kinase associated protein 1 - similar to PBX3a; pre B-cell leukemia transcription factor 3 - GTPase activating protein and VPS9 domains 1 | Major surface antigen precursor - Cytosolic phospholipase A2 [Includes: Phospholipase A2 ; Lysophospholipase ] - Paired box protein Pax-6 | NA | NA | ENSMUSG00000026867 - ENSMUSG00000038718 - ENSMUSG00000038696 | ENSCING00000006503 - ENSCING000000012912 - ENSCING00000006504 | NA |
| 1352459 | forkhead box P1 - eukaryotic translation initiation factor 4E member 3                                                                                              | NADH-ubiquinone oxidoreductase 49 kDa subunit - Paired box protein Pax-7                                                                  | NA | NA | ENSMUSG00000030067 - ENSMUSG00000030068                      | ENSCING00000005904 - ENSCING00000005858                       | NA |
| 1352510 | hypoxia-inducible factor 1, alpha subunit inhibitor - paired box gene 2                                                                                             | Abnormal cell lineage protein 11 - F-actin capping protein alpha subunit - Cholecystokinin receptor                                       | NA | NA | ENSMUSG00000036450 - ENSMUSG00000004231                      | ENSCING00000011502 - ENSCING00000005928 - ENSCING000000011503 | NA |
| 1352540 | zinc finger protein 503 - predicted gene 5670 - RIKEN cDNA 1700112E06 gene                                                                                          | 3-5 exonuclease ERI1 (Histone mRNA 3 end-specific exoribonuclease) (Protein 3hExo) - T-cell leukemia homeobox protein 3 - Nephrocystin-4  | NA | NA | ENSMUSG00000059827 - ENSMUSG00000039081 - ENSMUSG00000063458 | ENSCING00000006177 - ENSCING00000006178 - ENSCING00000006175  | NA |
| 1352542 | tetratricopeptide repeat domain 29 - POU domain, class 4, transcription factor 2                                                                                    | Slit homolog 3 protein precursor - Coronin 7                                                                                              | NA | NA | ENSMUSG00000037101 - ENSMUSG00000031688                      | ENSCING00000004409 - ENSCING000000011478                      | NA |
| 1352581 | SRY-box containing gene 21 - ATP-binding cassette, sub-family C (CFTR/MRP), member 4                                                                                | Hepatocyte nuclear factor 1-alpha - Casein kinase II beta subunit                                                                         | NA | NA | ENSMUSG00000032849 - ENSMUSG00000061517                      | ENSCING00000003902 - ENSCING00000003920                       | NA |
| 1352645 | RIKEN cDNA B230120H23 gene - cell division cycle associated 7                                                                                                       | Zygote-specific protein 3 precursor - Protein dhp1                                                                                        | NA | NA | ENSMUSG00000055612 - ENSMUSG0000004085                       | ENSCING00000013453 - ENSCING00000008798                       | NA |
| 1352661 | hypoxia-inducible factor 1, alpha subunit inhibitor - paired box gene 2                                                                                             | Tudor domain containing protein 3 - Cadherin-related tumor suppressor homolog precursor                                                   | NA | NA | ENSMUSG00000036450 - ENSMUSG00000004231                      | ENSCING00000001864 - ENSCING00000001838                       | NA |

|         |                                                                                                                                                     |                                                                                                                                                                          |                                                                                                                                                                                                                                                                                                                     |                                                                                                                                  |                                                                                                                          |                                                             |                                       |
|---------|-----------------------------------------------------------------------------------------------------------------------------------------------------|--------------------------------------------------------------------------------------------------------------------------------------------------------------------------|---------------------------------------------------------------------------------------------------------------------------------------------------------------------------------------------------------------------------------------------------------------------------------------------------------------------|----------------------------------------------------------------------------------------------------------------------------------|--------------------------------------------------------------------------------------------------------------------------|-------------------------------------------------------------|---------------------------------------|
| 1352662 | similar to PBX3a; pre B-cell leukemia transcription factor 3 - family with sequence similarity 125, member B; similar to RIKEN cDNA 2610528K11 gene | Tudor domain containing protein 3 - Cadherin-related tumor suppressor homolog precursor                                                                                  | NA                                                                                                                                                                                                                                                                                                                  | NA                                                                                                                               | ENSMUSG00000038740 - ENSING00000001864 - ENSMUSG00000038718 - ENSING00000001838                                          | NA                                                          | NA                                    |
| 1352667 | similar to CDNA sequence BC052040; cDNA sequence BC052040 - Meis homeobox 2                                                                         | Potential phospholipid-transporting ATPase 11 - Homeobox protein Nkx-6.1                                                                                                 | NA                                                                                                                                                                                                                                                                                                                  | NA                                                                                                                               | ENSMUSG00000040282 - ENSING00000012312 - ENSMUSG00000027210 - ENSING000000012311                                         | NA                                                          | NA                                    |
| 1352693 | kelch-like 1 - dachshund 1 - RIKEN cDNA 2410129H14 gene                                                                                             | Ketosamine-3-kinase - RNA-binding protein with multiple splicing - Dynactin subunit 6                                                                                    | zinc finger protein 729 - NA                                                                                                                                                                                                                                                                                        | NA                                                                                                                               | ENSMUSG00000055639 - ENSING00000002848 - ENSMUSG00000022076 - ENSING00000002842 - ENSMUSG00000033186 - ENSING00000002854 | 82629 - 82628 - 94458                                       | NA                                    |
| 1352705 | paired related homeobox protein-like 1 - RIKEN cDNA 9430077A04 gene                                                                                 | Alpha-fetoprotein enhancer binding protein , ZFHx2_HUMAN Zinc finger homeobox protein 2 - Myosin-3                                                                       | telomeric repeat-binding factor 1 - ttaggg repeat-binding factor 1 - tripartite motif-containing protein 3 - brain-expressed ring finger protein - ring finger protein 22 - ring finger protein 97 - protein argonaute-2 - eukaryotic translation initiation factor 2c 2 - paz piwi domain protein - protein slicer | NA                                                                                                                               | ENSMUSG00000044973 - ENSING00000011787 - ENSMUSG00000041730 - ENSING00000007138                                          | 77833 - 77832 - 217969                                      | NA                                    |
| 1352726 | early B-cell factor 3 - RIKEN cDNA 9430038I01 gene - NA                                                                                             | Septin-9 (Ovarian/Breast septin) (Ov/Br septin) - Growth/differentiation factor 8 precursor                                                                              | NA                                                                                                                                                                                                                                                                                                                  | NA                                                                                                                               | ENSMUSG00000040139 - ENSMUSG00000073800 - ENSMUSG00000010476                                                             | ENSCING00000004910 - ENSING000000004894                     | NA                                    |
| 1352802 | serine/threonine kinase 33 - LIM domain only 1                                                                                                      | CUB and sushi multiple domains protein 3 - Doublesex-and mab-3-related transcription factor 2                                                                            | NA                                                                                                                                                                                                                                                                                                                  | NA                                                                                                                               | ENSMUSG00000031027 - ENSING000000005905 - ENSMUSG00000036111 - ENSING000000009143                                        | NA                                                          | NA                                    |
| 1352843 | RAB11 family interacting protein 2 - empty spiracles homolog 2                                                                                      | Activator 1 140 kDa subunit - Dynactin-1 - Hypothetical protein R02F2.2 in chromosome III precursor                                                                      | NA                                                                                                                                                                                                                                                                                                                  | NA                                                                                                                               | ENSMUSG00000043969 - ENSMUSG00000040022                                                                                  | ENSCING00000005341 - ENSING000000005319 - ENSING00000005344 | NA                                    |
| 1352850 | forkhead box P2 - MyoD family inhibitor domain containing                                                                                           | Glucose dehydrogenase [acceptor] precursor [Contains: Glucose dehydrogenase [acceptor] short protein] - Phenylalanyl-tRNA synthetase beta chain - Homeobox protein Meis1 | NA                                                                                                                                                                                                                                                                                                                  | glutamine synthetase - glutamate decarboxylase - glutamate--ammonia ligase - bone morphogenetic protein 7 - osteogenic protein 1 | ENSMUSG00000029563 - ENSMUSG00000041390                                                                                  | ENSCING00000005377 - ENSING00000013955 - ENSING00000005356  | GSOIDT00001808001 - GSOIDT00001809001 |
| 1352851 | H2.0-like homeobox - similar to MOSC domain-containing protein 1, mitochondrial; MOCO sulphurase C-terminal domain containing 1                     | Glucose dehydrogenase [acceptor] precursor [Contains: Glucose dehydrogenase [acceptor] short protein] - Homeobox protein Meis1 - Phenylalanyl-tRNA synthetase beta chain | NA                                                                                                                                                                                                                                                                                                                  | NA                                                                                                                               | ENSMUSG00000039377 - ENSMUSG00000026621                                                                                  | ENSCING00000005377 - ENSING00000013955 - ENSING00000005356  | NA                                    |
| 1352852 | distal-less homeobox 2 - distal-less homeobox 1                                                                                                     | Glucose dehydrogenase [acceptor] precursor [Contains: Glucose dehydrogenase [acceptor] short protein] - Homeobox protein Meis1 - Phenylalanyl-tRNA synthetase beta chain | NA                                                                                                                                                                                                                                                                                                                  | NA                                                                                                                               | ENSMUSG00000023391 - ENSMUSG00000041911                                                                                  | ENSCING00000005377 - ENSING00000013955 - ENSING00000005356  | NA                                    |
| 1352875 | teashirt zinc finger family member 3 - zinc finger protein 536 - RIKEN cDNA E130304I02 gene                                                         | Alpha-fetoprotein enhancer binding protein , ZFHx2_HUMAN Zinc finger homeobox protein 2 - Myosin-3                                                                       | NA                                                                                                                                                                                                                                                                                                                  | NA                                                                                                                               | ENSMUSG00000044997 - ENSMUSG00000043456 - ENSMUSG00000021217                                                             | ENSCING00000011787 - ENSING00000007138                      | NA                                    |

|         |                                                                                                                |                                                                                                                                                                                                                                     |                                                                                                                                                                |    |                                                                 |                                                                 |                          |    |
|---------|----------------------------------------------------------------------------------------------------------------|-------------------------------------------------------------------------------------------------------------------------------------------------------------------------------------------------------------------------------------|----------------------------------------------------------------------------------------------------------------------------------------------------------------|----|-----------------------------------------------------------------|-----------------------------------------------------------------|--------------------------|----|
| 1352888 | trans-acting transcription factor 5 - predicted gene 9822                                                      | Large neutral amino acids transporter small subunit 3 (Solute carrier family 43, member 1) - Serine/threonine-protein kinase Pim-3 - Heat shock 70 kDa protein                                                                      | NA                                                                                                                                                             | NA | ENSMUSG00000075304 - ENSMUSG000000047965                        | ENSCING00000012728 - ENSCING00000007955 - ENSCING000000007953   | NA                       |    |
| 1352890 | cell division cycle associated 7 - trans-acting transcription factor 3                                         | Transcription factor SOX-8 - Guanine nucleotide-binding protein G, alpha subunit                                                                                                                                                    | kelch-like protein 35 - small nuclear ribonucleoprotein f - sm protein f - ribonuclease kappa                                                                  | NA | ENSMUSG000000055612 - ENSMUSG000000027109                       | ENSCING00000000839 - ENSCING00000001019                         | 168514 - 271061 - 271062 | NA |
| 1352909 | forkhead box P2 - MyoD family inhibitor domain containing                                                      | CUB and sushi multiple domains protein 3 - Doublesex-and mab-3-related transcription factor 2                                                                                                                                       | NA                                                                                                                                                             | NA | ENSMUSG000000041390 - ENSMUSG000000029563                       | ENSCING000000005905 - ENSCING000000009143                       | NA                       | NA |
| 1352948 | predicted gene 572 - castor homolog 1, zinc finger ; similar to castor homolog 1, zinc finger                  | Uronate isomerase - Probable thiamine biosynthesis protein thil                                                                                                                                                                     | NA                                                                                                                                                             | NA | ENSMUSG000000028977 - ENSMUSG000000070577                       | ENSCING000000012776 - ENSCING000000012775                       | NA                       | NA |
| 1352950 | aquaporin 4 - potassium channel tetramerisation domain containing 1                                            | Uronate isomerase - Probable thiamine biosynthesis protein thil                                                                                                                                                                     | NA                                                                                                                                                             | NA | ENSMUSG000000024411 - ENSMUSG000000036225                       | ENSCING000000012776 - ENSCING000000012775                       | NA                       | NA |
| 1352987 | multiple C2 domains, transmembrane 1 - ankyrin repeat domain 32                                                | Microtubule-associated serine/threonine-protein kinase 1 (Syntrophin-associated serine/threonine-protein kinase) - Latrophilin-2 precursor                                                                                          | NA                                                                                                                                                             | NA | ENSMUSG000000021596 - ENSMUSG000000021597                       | ENSCING000000009244 - ENSCING000000009247                       | NA                       | NA |
| 1353009 | eukaryotic translation initiation factor 4E member 3 - forkhead box P1                                         | Bone morphogenetic protein 2 precursor - LIM/homeobox protein Lhx4 - DVR-1 protein precursor                                                                                                                                        | NA                                                                                                                                                             | NA | ENSMUSG000000030067 - ENSMUSG000000030068                       | ENSCING000000001561 - ENSCING000000013600 - ENSCING000000001549 | NA                       | NA |
| 1353035 | dachshund 1 - kelch-like 1 - RIKEN cDNA 2410129H14 gene                                                        | Ephrin-B1 precursor - Ephrin-A5 precursor - Ephrin-A5b precursor                                                                                                                                                                    | domain-containing protein 7 - jumonji domain-containing protein 7 - nucleolar protein 10 - monocarboxylate transporter 12 - solute carrier family 16 member 12 | NA | ENSMUSG000000055639 - ENSMUSG000000033186 - ENSMUSG000000022076 | ENSCING000000005716 - ENSCING000000005717 - ENSCING000000010080 | 115272 - 90706 - 90708   | NA |
| 1353043 | SRY-box containing gene 6 - RIKEN cDNA 1110006G14 gene - predicted gene 6816; ribosomal protein S4, Y-linked 2 | Mu-type opioid receptor - Glutamine amidotransferase subunit pdxT - Rho-GTPase-activating protein 26                                                                                                                                | NA                                                                                                                                                             | NA | ENSMUSG000000030664 - ENSMUSG000000046411 - ENSMUSG000000051910 | ENSCING000000003601 - ENSCING000000003600 - ENSCING000000006260 | NA                       | NA |
| 1353047 | zinc finger, AN1-type domain 2A - UNC homeobox                                                                 | ATP synthase B chain , ASPP1_MOUSE Apoptosis stimulating of p53 protein 1 ,GRLF1_MOUSE Glucocorticoid receptor DNA binding factor 1 - HLA class I histocompatibility antigen, B-54 alpha chain precursor (MHC class I antigen B*54) | NA                                                                                                                                                             | NA | ENSMUSG000000053581 - ENSMUSG000000029546                       | ENSCING000000013784 - ENSCING000000004384                       | NA                       | NA |
| 1353058 | taste receptor, type 1, member 2 - paired box gene 7                                                           | Alpha-fetoprotein enhancer binding protein , ZFH2_HUMAN Zinc finger homeobox protein 2 - Myosin-3                                                                                                                                   | NA                                                                                                                                                             | NA | ENSMUSG000000028736 - ENSMUSG000000028738                       | ENSCING000000011787 - ENSCING000000007138                       | NA                       | NA |

|         |                                                                                                                   |                                                                                                                                                                                                                         |    |    |                                                                                                                                 |    |                                       |
|---------|-------------------------------------------------------------------------------------------------------------------|-------------------------------------------------------------------------------------------------------------------------------------------------------------------------------------------------------------------------|----|----|---------------------------------------------------------------------------------------------------------------------------------|----|---------------------------------------|
| 1353060 | tetratricopeptide repeat domain 29 - POU domain, class 4, transcription factor 2                                  | Alpha-fetoprotein enhancer binding protein , ZFHx2_HUMAN Zinc finger homeobox protein 2 - Myosin-3                                                                                                                      | NA | NA | ENSMUSG00000037101 - ENSCING00000011787 - ENSMUSG00000031688 - ENSCING00000007138                                               | NA | NA                                    |
| 1353064 | zinc finger protein 503 - RIKEN cDNA 1700112E06 gene - predicted gene 5670                                        | Alpha-fetoprotein enhancer binding protein , ZFHx2_HUMAN Zinc finger homeobox protein 2 - Myosin-3                                                                                                                      | NA | NA | ENSMUSG00000059827 - ENSMUSG00000039081 - ENSMUSG00000063458 - ENSCING00000011787 - ENSCING00000007138                          | NA | NA                                    |
| 1353136 | early B-cell factor 3 - RIKEN cDNA 9430038I01 gene - NA                                                           | Serine/threonine-protein kinase 9 - Degenerin-like protein T28F4.2 in chromosome I - DVR-1 protein precursor                                                                                                            | NA | NA | ENSMUSG00000040139 - ENSMUSG00000073800 - ENSMUSG000000010476 - ENSCING00000011558 - ENSCING00000004054 - ENSCING000000004052   | NA | NA                                    |
| 1353210 | early B-cell factor 3 - RIKEN cDNA 9430038I01 gene - NA                                                           | Tiggy-winkle hedgehog protein precursor - Protein C9orf68 homolog - Monodehydroascorbate reductase, chloroplast precursor                                                                                               | NA | NA | ENSMUSG00000040139 - ENSMUSG00000073800 - ENSMUSG000000010476 - ENSCING000000006761 - ENSCING000000009956 - ENSCING000000006763 | NA | NA                                    |
| 1353285 | hypoxia-inducible factor 1, alpha subunit inhibitor - paired box gene 2                                           | Conidial yellow pigment biosynthesis polyketide synthase - Mitogen-activated protein kinase kinase kinase 4 (MAPK/ERK kinase kinase 4) - Protein A9                                                                     | NA | NA | ENSMUSG00000036450 - ENSMUSG00000004231 - ENSCING00000003013 - ENSCING000000014087                                              | NA | NA                                    |
| 1353297 | DNA segment, Chr 19, ERATO Doi 737, expressed - prolactin releasing hormone receptor - RIKEN cDNA E330013P04 gene | Nucleolar RNA helicase II (RH II/Gu) - Neurogenic locus notch homolog protein 1 precursor                                                                                                                               | NA | NA | ENSMUSG00000057858 - ENSMUSG00000045052 - ENSMUSG00000053117 - ENSCING00000003502 - ENSCING000000003521                         | NA | NA                                    |
| 1353401 | BarH-like 1 - RIKEN cDNA 1700101E01 gene                                                                          | Glioma tumor suppressor candidate region gene 1 protein - Vang-like protein 1                                                                                                                                           | NA | NA | ENSMUSG00000026805 - ENSMUSG00000079502 - ENSCING00000003625 - ENSCING000000003631                                              | NA | NA                                    |
| 1353403 | serine/threonine kinase 33 - LIM domain only 1                                                                    | Filamin C - Voltage-dependent T-type calcium channel alpha-1H subunit                                                                                                                                                   | NA | NA | ENSMUSG00000031027 - ENSMUSG00000036111 - ENSCING00000001148 - ENSCING000000003272                                              | NA | NA                                    |
| 1353461 | forkhead box P1 - eukaryotic translation initiation factor 4E member 3                                            | Forkhead box protein P1 - Oxygen-independent coproporphyrinogen III oxidase , PM34_MOUSE Peroxisomal membrane protein PMP34 (Solute carrier family 25, member 17) - Chromatin structure remodeling complex protein RSC2 | NA | NA | ENSMUSG00000030067 - ENSMUSG00000030068 - ENSCING00000012008 - ENSCING00000012009 - ENSCING000000003572                         | NA | NA                                    |
| 1353497 | zinc finger homeodomain 4 - NA                                                                                    | Laminin alpha-2 chain precursor - Ornithine decarboxylase                                                                                                                                                               | NA | NA | ENSMUSG00000074728 - ENSMUSG00000025255 - ENSCING000000007891 - ENSCING000000007892                                             | NA | NA                                    |
| 1353498 | forkhead box P2 - MyoD family inhibitor domain containing                                                         | Laminin alpha-2 chain precursor - Ornithine decarboxylase                                                                                                                                                               | NA | NA | ENSMUSG00000029563 - ENSMUSG00000041390 - ENSCING000000007891 - ENSCING000000007892                                             | NA | GSOIDT00009863001 - GSOIDT00009862001 |

|         |                                                                                                                                                                                                             |                                                                                                                                                               |    |    |                                                                 |                                                              |    |    |
|---------|-------------------------------------------------------------------------------------------------------------------------------------------------------------------------------------------------------------|---------------------------------------------------------------------------------------------------------------------------------------------------------------|----|----|-----------------------------------------------------------------|--------------------------------------------------------------|----|----|
| 1353533 | hypoxia-inducible factor 1, alpha subunit inhibitor - paired box gene 2                                                                                                                                     | Ubiquitin carboxyl-terminal hydrolase 2 - Homeobox prospero-like protein PROX1 - YEATS domain-containing protein 4                                            | NA | NA | ENSMUSG00000036450 - ENSMUSG00000004231                         | ENSCING00000009000 - ENSCING00000013650 - ENSCING00000010516 | NA | NA |
| 1353614 | SRY-box containing gene 6 - predicted gene 6816; ribosomal protein S4, Y-linked 2                                                                                                                           | Carnitine O-palmitoyltransferase I, mitochondrial liver isoform - DNA gyrase subunit B                                                                        | NA | NA | ENSMUSG00000046411 - ENSMUSG000000051910                        | ENSCING00000003785 - ENSCING00000003789                      | NA | NA |
| 1353620 | paired related homeobox protein-like 1 - RIKEN cDNA 9430077A04 gene                                                                                                                                         | Microtubule-associated serine/threonine-protein kinase 1 (Syntrophin-associated serine/threonine-protein kinase) - Latrophilin-2 precursor                    | NA | NA | ENSMUSG00000044973 - ENSMUSG000000041730                        | ENSCING00000009244 - ENSCING00000009247                      | NA | NA |
| 1353622 | orofacial cleft 1 candidate 1 - solute carrier family 35, member B3                                                                                                                                         | Microtubule-associated serine/threonine-protein kinase 1 (Syntrophin-associated serine/threonine-protein kinase) - Latrophilin-2 precursor                    | NA | NA | ENSMUSG00000021432 - ENSMUSG000000047094                        | ENSCING00000009244 - ENSCING00000009247                      | NA | NA |
| 1353651 | neurogenic differentiation 2 - CDC2-related kinase, arginine/serine-rich                                                                                                                                    | Bone morphogenetic protein 2 precursor - LIM/homeobox protein Lhx4                                                                                            | NA | NA | ENSMUSG00000003119 - ENSMUSG000000038255                        | ENSCING00000001561 - ENSCING00000001549                      | NA | NA |
| 1353652 | adenylate cyclase activating polypeptide 1 receptor 1 - neurogenic differentiation 6                                                                                                                        | Bone morphogenetic protein 2 precursor - LIM/homeobox protein Lhx4                                                                                            | NA | NA | ENSMUSG000000037984 - ENSMUSG000000029778                       | ENSCING00000001561 - ENSCING00000001549                      | NA | NA |
| 1353655 | zinc finger protein 503 - RIKEN cDNA 1700112E06 gene - predicted gene 5670                                                                                                                                  | Sal-like protein 3 - Tumor suppressor candidate 2                                                                                                             | NA | NA | ENSMUSG000000059827 - ENSMUSG000000039081 - ENSMUSG000000063458 | ENSCING00000003817 - ENSCING00000003802                      | NA | NA |
| 1353683 | serine/threonine kinase 33 - LIM domain only 1                                                                                                                                                              | Anthranilate synthase component II [Includes: Glutamine amidotransferase; Anthranilate phosphoribosyltransferase ] - Protein KIAA0323 - Frizzled 10 precursor | NA | NA | ENSMUSG000000031027 - ENSMUSG000000036111                       | ENSCING00000014111 - ENSCING00000014116 - ENSCING00000002422 | NA | NA |
| 1353736 | H6 homeo box 2 - H6 homeo box 3                                                                                                                                                                             | Homeobox protein SIX2 - Probable phosphoketolase , PHK_GLOVI Probable phosphoketolase - Baculoviral IAP repeat-containing protein 5                           | NA | NA | ENSMUSG000000050100 - ENSMUSG000000040148                       | ENSCING00000004985 - ENSCING00000004979                      | NA | NA |
| 1353795 | early B-cell factor 3 - RIKEN cDNA 9430038I01 gene - NA                                                                                                                                                     | Putative Polycomb group protein ASXL1 - Forkhead box protein Q1 (HNF-3/forkhead-like protein 1)                                                               | NA | NA | ENSMUSG000000073800 - ENSMUSG000000040139 - ENSMUSG000000010476 | ENSCING00000009458 - ENSCING00000003911                      | NA | NA |
| 1353839 | mitogen-activated protein kinase associated protein 1 - family with sequence similarity 125, member B; similar to RIKEN cDNA 2610528K11 gene - similar to PBX3a; pre B-cell leukemia transcription factor 3 | Cadmium induced protein AS8 - Leucyl-tRNA synthetase                                                                                                          | NA | NA | ENSMUSG000000038740 - ENSMUSG000000038718 - ENSMUSG000000038696 | ENSCING00000012059 - ENSCING00000012060                      | NA | NA |

|         |                                                                                                                                                                                                             |                                                                                                                                         |    |                                                                                   |                                                                 |                                                                 |    |                                       |
|---------|-------------------------------------------------------------------------------------------------------------------------------------------------------------------------------------------------------------|-----------------------------------------------------------------------------------------------------------------------------------------|----|-----------------------------------------------------------------------------------|-----------------------------------------------------------------|-----------------------------------------------------------------|----|---------------------------------------|
| 1353858 | myosin, light polypeptide 2, regulatory, cardiac, slow - family with sequence similarity 109, member A - cut-like homeobox 2                                                                                | Zinc finger homeobox protein 1b - Nebulin                                                                                               | NA | voltage-dependent calcium channel type a subunit alpha-1 - cacophony protein - NA | ENSMUSG00000013936 - ENSMUSG000000042589 - ENSMUSG000000044134  | ENSCING00000006930 - ENSCING00000006937                         | NA | GSOIDT00015455001 - GSOIDT00015454001 |
| 1353884 | NA - forkhead box P1                                                                                                                                                                                        | Leishmanolysin precursor - B(0,+)-type amino acid transporter 1 (B(0,+AT) (Glycoprotein-associated amino acid transporter b0,+AT1) - NA | NA | NA                                                                                | ENSMUSG000000030067 - ENSMUSG000000079448                       | ENSCING00000005119 - ENSCING00000005124 - ENSCING00000005136    | NA | NA                                    |
| 1353914 | mitogen-activated protein kinase associated protein 1 - family with sequence similarity 125, member B; similar to RIKEN cDNA 2610528K11 gene - similar to PBX3a; pre B-cell leukemia transcription factor 3 | Hypothetical UPF0219 protein TV0132 - 1-phosphatidylinositol-4,5-bisphosphate phosphodiesterase-like 4                                  | NA | NA                                                                                | ENSMUSG000000038740 - ENSMUSG000000038718 - ENSMUSG000000038696 | ENSCING000000012490 - ENSCING00000007600                        | NA | NA                                    |
| 1353915 | mitogen-activated protein kinase kinase 5 - ladybird homeobox 1 homolog corepressor 1                                                                                                                       | Hypothetical UPF0219 protein TV0132 - 1-phosphatidylinositol-4,5-bisphosphate phosphodiesterase-like 4                                  | NA | NA                                                                                | ENSMUSG000000058444 - ENSMUSG000000022245                       | ENSCING000000007600 - ENSCING000000012490                       | NA | NA                                    |
| 1353929 | paired box gene 5 - zinc finger, CCHC domain containing 7 - maternal embryonic leucine zipper kinase                                                                                                        | Leishmanolysin precursor - B(0,+)-type amino acid transporter 1 (B(0,+AT) (Glycoprotein-associated amino acid transporter b0,+AT1) - NA | NA | NA                                                                                | ENSMUSG000000035683 - ENSMUSG000000035649 - ENSMUSG000000014030 | ENSCING00000005119 - ENSCING00000005124 - ENSCING00000005136    | NA | NA                                    |
| 1353951 | paired-like homeobox 2b - transmembrane protein 33                                                                                                                                                          | Hypothetical UPF0219 protein TV0132 - 1-phosphatidylinositol-4,5-bisphosphate phosphodiesterase-like 4                                  | NA | NA                                                                                | ENSMUSG000000037720 - ENSMUSG000000012520                       | ENSCING000000007600 - ENSCING000000012490                       | NA | NA                                    |
| 1353964 | early B-cell factor 3 - RIKEN cDNA 9430038I01 gene - NA                                                                                                                                                     | Eukaryotic translation initiation factor 2-alpha kinase 4                                                                               | NA | NA                                                                                | ENSMUSG000000073800 - ENSMUSG000000040139 - ENSMUSG000000010476 | ENSCING000000009891                                             | NA | NA                                    |
| 1354015 | early B-cell factor 3 - RIKEN cDNA 9430038I01 gene - NA                                                                                                                                                     | Kinesin-like protein KIF1A - NAD-dependent malic enzyme - Integrin alpha-M precursor                                                    | NA | NA                                                                                | ENSMUSG000000040139 - ENSMUSG000000073800 - ENSMUSG000000010476 | ENSCING000000008961 - ENSCING000000013644 - ENSCING000000013643 | NA | NA                                    |
| 1354042 | zinc finger protein 503 - RIKEN cDNA 1700112E06 gene - predicted gene 5670                                                                                                                                  | Fibrillin-1 precursor - Probable sulfate adenylyltransferase                                                                            | NA | NA                                                                                | ENSMUSG000000059827 - ENSMUSG000000039081 - ENSMUSG000000063458 | ENSCING000000008571 - ENSCING000000012628                       | NA | NA                                    |
| 1354045 | RIKEN cDNA B230120H23 gene - cell division cycle associated 7                                                                                                                                               | Epidermal Langerhans cell protein LCP1 - Phosphoenolpyruvate-protein phosphotransferase (Phosphotransferase system, enzyme I)           | NA | NA                                                                                | ENSMUSG000000055612 - ENSMUSG00000004085                        | ENSCING000000009516 - ENSCING000000009517                       | NA | NA                                    |
| 1354048 | DNA segment, Chr 6, ERATO Doi 474, expressed - SRY-box containing gene 5 - NA                                                                                                                               | Epidermal Langerhans cell protein LCP1 - Phosphoenolpyruvate-protein phosphotransferase (Phosphotransferase system, enzyme I)           | NA | NA                                                                                | ENSMUSG000000072677 - ENSMUSG000000072679 - ENSMUSG000000041540 | ENSCING000000009516 - ENSCING000000009517                       | NA | NA                                    |



|         |                                                                                                                               |                                                                                                                                                           |                                                      |    |                                                                 |                                                                 |               |    |
|---------|-------------------------------------------------------------------------------------------------------------------------------|-----------------------------------------------------------------------------------------------------------------------------------------------------------|------------------------------------------------------|----|-----------------------------------------------------------------|-----------------------------------------------------------------|---------------|----|
| 1354063 | short stature homeobox 2 - arginine/serine-rich coiled-coil 1 - myeloid leukemia factor 1                                     | Hypothetical UPF0219 protein TV0132 - 1-phosphatidylinositol-4,5-bisphosphate phosphodiesterase-like 4                                                    | NA                                                   | NA | ENSMUSG00000048416 - ENSMUSG00000034544 - ENSMUSG00000027833    | ENSCING00000007600 - ENSCING000000012490                        | NA            | NA |
| 1354068 | proteasome (prosome, macropain) 26S subunit, non-ATPase, 7 - zinc finger homeobox 3 - RIKEN cDNA 4922502B01 gene              | Hypothetical 51.0 kDa protein in YIP3-TFC5 intergenic region - Spectrin beta chain, brain 1 (Spectrin, non-erythroid beta chain 1) - WD-repeat protein 35 | nephrocystin-3 - tetratricopeptide repeat protein 28 | NA | ENSMUSG000000038872 - ENSMUSG000000054165 - ENSMUSG000000039067 | ENSCING00000008947 - ENSCING00000008962 - ENSCING00000008946    | 70033 - 70034 | NA |
| 1354116 | similar to c-Maf long form; avian musculoaponeurotic fibrosarcoma AS42 oncogene homolog - WW domain-containing oxidoreductase | Stanniocalcin 1 precursor - Bromodomain-containing protein 8                                                                                              | NA                                                   | NA | ENSMUSG00000004637 - ENSMUSG000000055435                        | ENSCING00000007428 - ENSCING00000007427                         | NA            | NA |
| 1354218 | vacuolar protein sorting 41 - POU domain, class 6, transcription factor 2                                                     | Semaphorin 6A precursor - Myosin IJ heavy chain, RUFY1_HUMAN RUN and FYVE domain containing protein 1                                                     | NA                                                   | NA | ENSMUSG000000041236 - ENSMUSG00000009734                        | ENSCING000000010126 - ENSCING000000014403                       | NA            | NA |
| 1354230 | RIKEN cDNA 1700020O03 gene - estrogen related receptor, beta                                                                  | Glycoprotein 38 precursor - Systemic RNA interference defective protein 1 precursor - Sodium channel protein type X alpha subunit                         | NA                                                   | NA | ENSMUSG000000021254 - ENSMUSG000000021255                       | ENSCING000000013887 - ENSCING000000013886 - ENSCING000000013885 | NA            | NA |
| 1354244 | limb and neural patterns - ATP synthase, H+ transporting, mitochondrial F0 complex, subunit c, isoform 3                      | Poly-specific ribonuclease PARN protein 9, A2BP1_MOUSE Ataxin 2-binding protein 1                                                                         | NA                                                   | NA | ENSMUSG000000018770 - ENSMUSG000000009207                       | ENSCING000000013912 - ENSCING000000010142                       | NA            | NA |
| 1354247 | neurogenic differentiation 2 - CDC2-related kinase, arginine/serine-rich                                                      | Poly-specific ribonuclease PARN protein 9, A2BP1_MOUSE Ataxin 2-binding protein 1                                                                         | NA                                                   | NA | ENSMUSG000000038255 - ENSMUSG000000003119                       | ENSCING000000013912 - ENSCING000000010142                       | NA            | NA |
| 1354250 | adenylate cyclase activating polypeptide 1 receptor 1 - neurogenic differentiation 6                                          | Poly-specific ribonuclease PARN protein 9, A2BP1_MOUSE Ataxin 2-binding protein 1                                                                         | NA                                                   | NA | ENSMUSG000000037984 - ENSMUSG0000000029778                      | ENSCING000000013912 - ENSCING000000010142                       | NA            | NA |
